# Supplementary material
Source: PubMed Central journal article supplement (PMC3262091)
Supplement: NIHMS341211-supplement-1_si_001.pdf [file NIHMS341211-supplement-1_si_001.pdf]

# Three-Component Coupling Sequence for the Regiospecific Synthesis of Substituted Pyridines

*Ming Z. Chen<sup>†</sup> and Glenn C. Micalizio\**

Department of Chemistry, Scripps Florida, Jupiter, FL 33458

<sup>†</sup>Kellogg School of Science and Technology at The Scripps Research Institute

E-mail: [micalizio@scripps.edu](mailto:micalizio@scripps.edu)

## **Supporting Information**

Experimental Procedures and Spectral Data

**General.** All reactions were conducted in flame-dried glassware under an argon atmosphere with anhydrous solvents, unless otherwise noted. Anhydrous diethyl ether (Et<sub>2</sub>O) and tetrahydrofuran (THF) were obtained by passing HPLC grade solvents through activated alumina columns. Isobutyraldehyde, heptanal and benzaldehyde were distilled prior to use. Titanium(IV) tetraisopropoxide (Ti(O*i*-Pr)<sub>4</sub>) was purified prior to use by distillation at 250 millitorr. *c*-C<sub>5</sub>H<sub>9</sub>MgCl and *n*-BuLi were titrated using 1,10-phenanthroline/*sec*-butanol.<sup>1</sup> (*E*)-2-phenylbut-2-enal<sup>2</sup>, cyclopent-1-enecarbaldehyde<sup>3</sup>, cyclohept-1-enecarbaldehyde<sup>4</sup>, and 2-(methoxymethyl)acrylaldehyde<sup>5</sup> were synthesized according to the literature procedures. All other commercially available reagents were used as received. Thin-layer chromatography was performed on 250 μm E. Merck silica gel plates (60F-254). Silica gel for flash column chromatography was purchased from Silicycle (P60, particle size 40-63 μm). All compounds purified by chromatography were sufficiently pure for use in further experiments except otherwise indicated. <sup>1</sup>H NMR, <sup>13</sup>C NMR and <sup>19</sup>F NMR data were recorded at 400 MHz, 100 MHz and 376 MHz, respectively. <sup>1</sup>H NMR chemical shifts were reported relative to residual CHCl<sub>3</sub> (7.26 ppm). <sup>13</sup>C NMR chemical shifts were reported relative to the central line of CDCl<sub>3</sub> (77.23 ppm). Infrared spectra were recorded using a Perkin Elmer Spectrum One 2000 FT-IR spectrometer. Low-resolution mass spectrometry was performed using electrospray ionization.

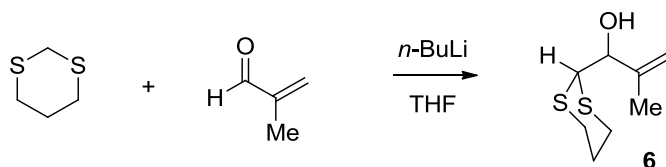

**Synthesis of 1-(1,3-dithian-2-yl)-2-methylprop-2-en-1-ol (6).** To a solution of 1,3-dithiane (601 mg, 5.0 mmol) in THF (50 mL) at  $-20\text{ }^{\circ}\text{C}$  was added dropwise *n*-BuLi (2.2 mL, 5.5 mmol, 2.5 M in hexanes). The resultant clear solution was stirred at the same temperature for 1 h. After cooling down to  $-78\text{ }^{\circ}\text{C}$ , methacrolein (412  $\mu\text{L}$ , 350 mg, 5.0 mmol) was added dropwise via a syringe. The reaction was stirred for 30 min, then quenched with saturated aqueous  $\text{NH}_4\text{Cl}$  (5 mL) and warmed to ambient temperature. The reaction mixture was further diluted with  $\text{H}_2\text{O}$  (10 mL) and extracted with  $\text{Et}_2\text{O}$  (3 x 20 mL). The combined organic extracts were washed with brine, dried over  $\text{MgSO}_4$ , filtered and concentrated *in vacuo*. The crude product was purified by flash column chromatography on silica gel (10 $\rightarrow$ 20% EtOAc/hexanes) to afford allylic alcohol **6** (904 mg, 95%) as a colorless oil.  $^1\text{H}$  NMR (400 MHz,  $\text{CDCl}_3$ )  $\delta$  5.06 (s, 1H), 4.97 (s, 1H), 4.25 (dd,  $J = 7.8, 3.0$  Hz, 1H), 3.97 (d,  $J = 7.8$  Hz, 1H), 2.95-2.82 (m, 2H), 2.77-2.66 (m, 3H), 2.09-1.98 (m, 1H), 1.96-1.84 (m, 1H), 1.73 (s, 3H);  $^{13}\text{C}$  NMR (100 MHz,  $\text{CDCl}_3$ )  $\delta$  143.1, 115.0, 76.4, 49.6, 28.6, 28.0, 25.6, 17.2; IR (thin film, NaCl)  $\nu_{\text{max}}$  3437 (br), 3075, 2900, 2239, 1813, 1652, 1424, 1373, 909, 749  $\text{cm}^{-1}$ ; LRMS (EI, H)  $m/z$  calc'd for  $\text{C}_8\text{H}_{14}\text{OS}_2\text{Na}$  [M + Na] 213.1, found 213.1.

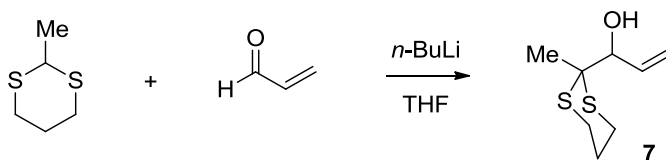

**Synthesis of 1-(2-methyl-1,3-dithian-2-yl)prop-2-en-1-ol (7).** To a solution of 2-methyl-1,3-dithiane (1.44 mL, 1.61 g, 12 mmol) in THF (100 mL) at  $-20\text{ }^{\circ}\text{C}$  was added dropwise *n*-BuLi (4.80 mL, 12 mmol, 2.5 M in hexanes). The resultant clear solution was stirred at the same temperature for 1 h. After cooling down to  $-78\text{ }^{\circ}\text{C}$ , acrolein (668  $\mu\text{L}$ , 561 mg, 10 mmol) was added dropwise via a syringe. The reaction was stirred for 30 min, then quenched with saturated aqueous  $\text{NH}_4\text{Cl}$  (10 mL) and warmed to ambient temperature. The reaction mixture was further diluted with  $\text{H}_2\text{O}$  (20 mL) and extracted with  $\text{Et}_2\text{O}$  (3 x 40 mL). The combined organic extracts were washed with brine, dried

over MgSO<sub>4</sub>, filtered and concentrated *in vacuo*. The crude product was purified by flash column chromatography on silica gel (5→15% EtOAc/hexanes) to afford allylic alcohol **7** (1.70 g, 90%) as a colorless oil. <sup>1</sup>H NMR (400 MHz, CDCl<sub>3</sub>) δ 6.05 (ddd, *J* = 17.7, 11.1, 5.2 Hz, 1H), 5.42 (d, *J* = 17.7 Hz, 1H), 5.27 (d, *J* = 11.1 Hz, 1H), 4.47 (d, *J* = 5.2 Hz, 1H), 3.07-2.92 (m, 2H), 2.83 (s, 1H), 2.65-2.57 (m, 2H), 2.11-2.02 (m, 1H), 1.90-1.77 (m, 1H), 1.32 (s, 3H); <sup>13</sup>C NMR (100 MHz, CDCl<sub>3</sub>) δ 134.2, 117.9, 72.3, 52.9, 26.2, 25.9, 24.3, 22.2; IR (thin film, NaCl) ν<sub>max</sub> 3460 (br), 2908, 1638, 1415, 1369, 1276, 1239, 1068, 990, 758 cm<sup>-1</sup>; LRMS (EI, H) *m/z* calc'd for C<sub>8</sub>H<sub>14</sub>OS<sub>2</sub>Na [M + Na] 213.1, found 213.2.

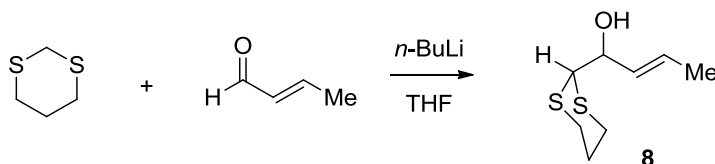

**Synthesis of (*E*)-1-(1,3-dithian-2-yl)but-2-en-1-ol (**8**).** To a solution of 1,3-dithiane (1.44 g, 12 mmol) in THF (100 mL) at -20 °C was added dropwise *n*-BuLi (4.80 mL, 12 mmol, 2.5 M in hexanes). The resultant clear solution was stirred at the same temperature for 1 h. After cooling down to -78 °C, (*E*)-crotonaldehyde (828 μL, 701 mg, 10 mmol) was added dropwise via a syringe. The reaction was stirred for 30 min, then quenched with saturated aqueous NH<sub>4</sub>Cl (10 mL) and warmed to ambient temperature. The reaction mixture was further diluted with H<sub>2</sub>O (20 mL) and extracted with Et<sub>2</sub>O (3 x 40 mL). The combined organic extracts were washed with brine, dried over MgSO<sub>4</sub>, filtered and concentrated *in vacuo*. The crude product was purified by flash column chromatography on silica gel (5→15% EtOAc/hexanes) to afford allylic alcohol **8** (1.71 g, 90%) as a colorless oil. <sup>1</sup>H NMR (400 MHz, CDCl<sub>3</sub>) δ 5.80 (dq, *J* = 15.2, 6.5 Hz, 1H), 5.56 (dd, *J* = 15.2, 7.0 Hz, 1H), 4.27 (appd t, *J* = 7.0 Hz, 1H), 3.93 (d, *J* = 7.0 Hz, 1H), 2.94-2.84 (m, 2H), 2.79-2.69 (m, 2H), 2.54 (s, 1H), 2.11-2.00 (m, 1H), 1.98-1.86 (m, 1H), 1.72 (d, *J* = 6.5 Hz, 3H); <sup>13</sup>C NMR (100 MHz, CDCl<sub>3</sub>) δ 130.1, 129.8, 73.7, 52.5, 28.7, 28.4, 25.8, 17.9; IR (thin film, NaCl) ν<sub>max</sub> 3430 (br), 2900, 1673, 1423, 1277, 1034, 964, 805 cm<sup>-1</sup>; LRMS (EI, H) *m/z* calc'd for C<sub>8</sub>H<sub>14</sub>OS<sub>2</sub>Na [M + Na] 213.1, found 213.1.

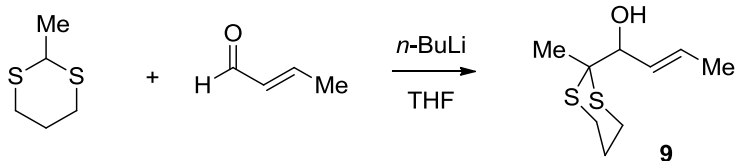

**Synthesis of (*E*)-1-(2-methyl-1,3-dithian-2-yl)but-2-en-1-ol (9).** To a solution of 2-methyl-1,3-dithiane (1.44 mL, 1.61 g, 12 mmol) in THF (100 mL) at  $-20\text{ }^{\circ}\text{C}$  was added dropwise *n*-BuLi (4.80 mL, 12 mmol, 2.5 M in hexanes). The resultant clear solution was stirred at the same temperature for 1 h. After cooling down to  $-78\text{ }^{\circ}\text{C}$ , (*E*)-crotonaldehyde (828  $\mu\text{L}$ , 701 mg, 10 mmol) was added dropwise via a syringe. The reaction was stirred for 30 min, then quenched with saturated aqueous  $\text{NH}_4\text{Cl}$  (10 mL) and warmed to ambient temperature. The reaction mixture was further diluted with  $\text{H}_2\text{O}$  (20 mL) and extracted with  $\text{Et}_2\text{O}$  (3 x 40 mL). The combined organic extracts were washed with brine, dried over  $\text{MgSO}_4$ , filtered and concentrated *in vacuo*. The crude product was purified by flash column chromatography on silica gel (5 $\rightarrow$ 15%  $\text{EtOAc}$ /hexanes) to afford allylic alcohol **9** (1.86 g, 91%) as a colorless oil.  $^1\text{H}$  NMR (400 MHz,  $\text{CDCl}_3$ )  $\delta$  5.82 (dq,  $J = 15.3, 6.5$  Hz, 1H), 5.64 (dd,  $J = 15.3, 6.3$  Hz, 1H), 4.39 (d,  $J = 6.3$  Hz, 1H), 3.06-2.93 (m, 2H), 2.74 (s, 1H), 2.70-2.56 (m, 2H), 2.13-1.99 (m, 1H), 1.95-1.79 (m, 1H), 1.71 (d,  $J = 6.5$  Hz, 3H), 1.36 (s, 3H);  $^{13}\text{C}$  NMR (100 MHz,  $\text{CDCl}_3$ )  $\delta$  130.0, 127.1, 73.1, 53.4, 26.3, 26.0, 24.5, 22.5, 18.1; IR (thin film, NaCl)  $\nu_{\text{max}}$  3467 (br), 2914, 1672, 1448, 1376, 1277, 1070, 969, 758  $\text{cm}^{-1}$ ; LRMS (EI, H)  $m/z$  calc'd for  $\text{C}_9\text{H}_{16}\text{OS}_2\text{Na}$  [ $\text{M} + \text{Na}$ ] 227.1, found 227.2.

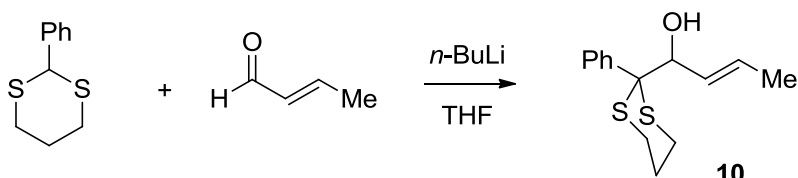

**Synthesis of (*E*)-1-(2-phenyl-1,3-dithian-2-yl)but-2-en-1-ol (10).** To a solution of 2-phenyl-1,3-dithiane (1.47 g, 7.5 mmol) in THF (50 mL) at  $-20\text{ }^{\circ}\text{C}$  was added dropwise *n*-BuLi (3.0 mL, 7.5 mmol, 2.5 M in hexanes). The resultant clear solution was stirred at the same temperature for 1 h. After cooling down to  $-78\text{ }^{\circ}\text{C}$ , (*E*)-crotonaldehyde (414  $\mu\text{L}$ , 350 mg, 5.0 mmol) was added dropwise via a syringe. The reaction was stirred for 30 min, then quenched with saturated aqueous  $\text{NH}_4\text{Cl}$  (5 mL) and warmed to ambient temperature. The reaction mixture was further diluted with  $\text{H}_2\text{O}$  (10 mL) and extracted with  $\text{Et}_2\text{O}$  (3 x 20 mL). The combined organic extracts were washed with brine, dried over  $\text{MgSO}_4$ , filtered and concentrated *in vacuo*. The crude product was purified by flash column chromatography on silica gel (10%  $\text{EtOAc}$ /hexanes) to afford allylic alcohol **10** (900 mg, 68%) as a colorless oil.  $^1\text{H}$  NMR (400 MHz,  $\text{CDCl}_3$ )  $\delta$  7.99 (d,  $J = 7.4$  Hz, 2H),

7.47-7.37 (m, 2H), 7.35-7.25 (m, 1H), 5.66 (dq,  $J = 15.2, 6.5$  Hz, 1H), 5.38 (dd,  $J = 15.2, 5.3$  Hz, 1H), 4.31 (appd t,  $J = 5.3$  Hz, 1H), 2.78-2.62 (m, 4H), 2.20 (d,  $J = 5.3$  Hz, 1H), 1.98-1.90 (m, 2H), 1.66 (d,  $J = 6.5$  Hz, 3H);  $^{13}\text{C}$  NMR (100 MHz,  $\text{CDCl}_3$ )  $\delta$  138.2, 130.8, 130.2, 128.5, 127.4, 127.4, 79.5, 65.3, 27.1, 27.0, 25.0, 17.8; IR (thin film, NaCl)  $\nu_{\text{max}}$  3464 (br), 3055, 2906, 2854, 2244, 1671, 1486, 1442, 1277, 907  $\text{cm}^{-1}$ ; LRMS (EI, H)  $m/z$  calc'd for  $\text{C}_{14}\text{H}_{18}\text{OS}_2\text{Na}$  [ $\text{M} + \text{Na}$ ] 289.1, found 289.1.

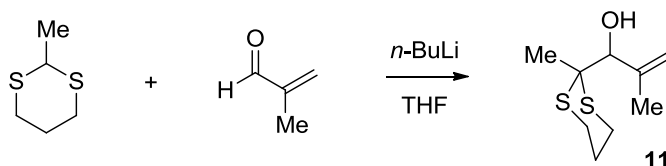

**Synthesis of 2-methyl-1-(2-methyl-1,3-dithian-2-yl)prop-2-en-1-ol (11).** To a solution of 2-methyl-1,3-dithiane (599  $\mu\text{L}$ , 671 mg, 5.0 mmol) in THF (50 mL) at  $-20$   $^\circ\text{C}$  was added dropwise  $n\text{-BuLi}$  (2.20 mL, 5.5 mmol, 2.5 M in hexanes). The resultant clear solution was stirred at the same temperature for 1 h. After cooling down to  $-78$   $^\circ\text{C}$ , methacrolein (618  $\mu\text{L}$ , 526 mg, 7.5 mmol) was added dropwise via a syringe. The reaction was stirred for 30 min, then quenched with saturated aqueous  $\text{NH}_4\text{Cl}$  (5 mL) and warmed to ambient temperature. The reaction mixture was further diluted with  $\text{H}_2\text{O}$  (10 mL) and extracted with  $\text{Et}_2\text{O}$  (3 x 20 mL). The combined organic extracts were washed with brine, dried over  $\text{MgSO}_4$ , filtered and concentrated *in vacuo*. The crude product was purified by flash column chromatography on silica gel (10%  $\text{EtOAc}$ /hexanes) to afford allylic alcohol **11** (733 mg, 72%) as a colorless oil.  $^1\text{H}$  NMR (400 MHz,  $\text{CDCl}_3$ )  $\delta$  5.13 (s, 1H), 5.11 (s, 1H), 4.47 (s, 1H), 3.09-2.96 (m, 2H), 2.89 (s, 1H), 2.72-2.63 (m, 2H), 2.14-2.04 (m, 1H), 2.06 (s, 3H), 2.06-1.82 (m, 1H), 1.44 (s, 3H);  $^{13}\text{C}$  NMR (100 MHz,  $\text{CDCl}_3$ )  $\delta$  142.4, 116.2, 75.0, 53.6, 26.8, 26.2, 24.5, 23.2, 21.9; IR (thin film, NaCl)  $\nu_{\text{max}}$  3460 (br), 3076, 2911, 1646, 1424, 1372, 1276, 1047, 908, 752  $\text{cm}^{-1}$ ; LRMS (EI, H)  $m/z$  calc'd for  $\text{C}_9\text{H}_{16}\text{OS}_2\text{Na}$  [ $\text{M} + \text{Na}$ ] 227.1, found 227.2.

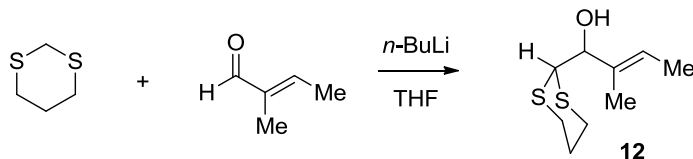

**Synthesis of (*E*)-1-(1,3-dithian-2-yl)-2-methylbut-2-en-1-ol (12).** To a solution of 1,3-dithiane (1.20 g, 10 mmol) in THF (100 mL) at  $-20$   $^\circ\text{C}$  was added dropwise  $n\text{-BuLi}$  (4.40

mL, 11 mmol, 2.5 M in hexanes). The resultant clear solution was stirred at the same temperature for 1 h. After cooling down to  $-78\text{ }^{\circ}\text{C}$ , (*E*)-2-methylbut-2-enal (1.45 mL, 1.26 g, 15 mmol) was added dropwise via a syringe. The reaction was stirred for 30 min, then quenched with saturated aqueous  $\text{NH}_4\text{Cl}$  (10 mL) and warmed to ambient temperature. The reaction mixture was further diluted with  $\text{H}_2\text{O}$  (20 mL) and extracted with  $\text{Et}_2\text{O}$  (3 x 40 mL). The combined organic extracts were washed with brine, dried over  $\text{MgSO}_4$ , filtered and concentrated *in vacuo*. The crude product was purified by flash column chromatography on silica gel (10 $\rightarrow$ 20%  $\text{EtOAc}$ /hexanes) to afford allylic alcohol **12** (1.92 g, 94%) as a colorless oil.  $^1\text{H}$  NMR (400 MHz,  $\text{CDCl}_3$ )  $\delta$  5.59 (q,  $J = 6.3$  Hz, 1H), 4.17 (d,  $J = 8.4$  Hz, 1H), 3.98 (d,  $J = 8.4$  Hz, 1H), 2.99-2.79 (m, 2H), 2.79-2.65 (m, 2H), 2.54 (s, 1H), 2.12-1.97 (m, 1H), 1.97-1.83 (m, 1H), 1.64 (d,  $J = 6.3$  Hz, 3H), 1.61 (s, 3H);  $^{13}\text{C}$  NMR (100 MHz,  $\text{CDCl}_3$ )  $\delta$  133.8, 125.0, 78.3, 49.8, 28.6, 28.0, 25.7, 13.3, 10.8; IR (thin film, NaCl)  $\nu_{\text{max}}$  3437 (br), 2900, 1671, 1423, 1379, 1277, 1016, 909, 828, 730  $\text{cm}^{-1}$ ; LRMS (EI, H)  $m/z$  calc'd for  $\text{C}_9\text{H}_{16}\text{OS}_2\text{Na}$  [ $\text{M} + \text{Na}$ ] 227.1, found 227.1.

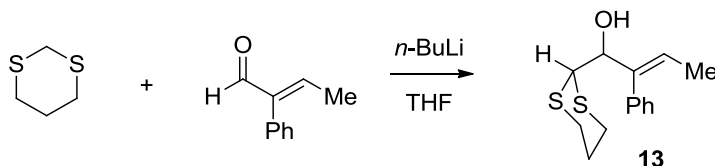

**Synthesis of (*E*)-1-(1,3-dithian-2-yl)-2-phenylbut-2-en-1-ol (**13**).** To a solution of 1,3-dithiane (877 mg, 7.29 mmol) in THF (50 mL) at  $-20\text{ }^{\circ}\text{C}$  was added dropwise *n*-BuLi (2.92 mL, 7.29 mmol, 2.5 M in hexanes). The resultant clear solution was stirred at the same temperature for 1 h. After cooling down to  $-78\text{ }^{\circ}\text{C}$ , (*E*)-2-phenylbut-2-enal (710 mg, 4.86 mmol) was added dropwise via a syringe. The reaction was stirred for 30 min, then quenched with saturated aqueous  $\text{NH}_4\text{Cl}$  (5 mL) and warmed to ambient temperature. The reaction mixture was further diluted with  $\text{H}_2\text{O}$  (10 mL) and extracted with  $\text{Et}_2\text{O}$  (3 x 20 mL). The combined organic extracts were washed with brine, dried over  $\text{MgSO}_4$ , filtered and concentrated *in vacuo*. The crude product was purified by flash column chromatography on silica gel (10%  $\text{EtOAc}$ /hexanes) to afford allylic alcohol **13** (1.20 g, 93%) as a yellow oil.  $^1\text{H}$  NMR (400 MHz,  $\text{CDCl}_3$ )  $\delta$  7.38-7.24 (m, 5H), 5.95 (q,  $J = 6.8$  Hz, 1H), 4.54 (dd,  $J = 7.9, 3.4$  Hz, 1H), 3.67 (d,  $J = 7.9$  Hz, 1H), 2.95-2.81 (m, 2H), 2.68 (d,  $J = 3.4$  Hz, 1H), 2.68-2.57 (m, 2H), 2.07-1.87 (m, 2H), 1.58 (d,  $J = 6.8$  Hz, 3H);  $^{13}\text{C}$  NMR (100 MHz,  $\text{CDCl}_3$ )  $\delta$  139.5, 137.1, 130.0, 128.2, 127.3, 127.3, 77.2, 49.7, 28.2,

27.5, 25.6, 14.6; IR (thin film, NaCl)  $\nu_{\max}$  3445 (br), 3053, 2903, 2241, 1599, 1493, 1423, 1277, 1082, 704  $\text{cm}^{-1}$ ; LRMS (EI, H)  $m/z$  calc'd for  $\text{C}_{14}\text{H}_{18}\text{OS}_2\text{Na}$  [M + Na] 289.1, found 289.1.

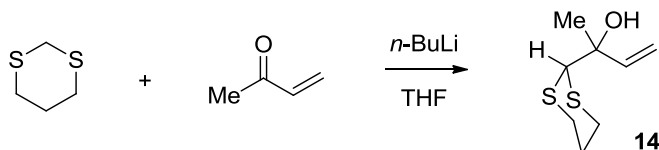

**Synthesis of 2-(1,3-dithian-2-yl)but-3-en-2-ol (14).** To a solution of 1,3-dithiane (1.44 g, 12 mmol) in THF (100 mL) at  $-20\text{ }^{\circ}\text{C}$  was added dropwise *n*-BuLi (4.80 mL, 12 mmol, 2.5 M in hexanes). The resultant clear solution was stirred at the same temperature for 1 h. After cooling down to  $-78\text{ }^{\circ}\text{C}$ , but-3-en-2-one (820  $\mu\text{L}$ , 700 mg, 10 mmol) was added dropwise via a syringe. The reaction was stirred for 30 min, then quenched with saturated aqueous  $\text{NH}_4\text{Cl}$  (10 mL) and warmed to ambient temperature. The reaction mixture was further diluted with  $\text{H}_2\text{O}$  (20 mL) and extracted with  $\text{Et}_2\text{O}$  (3 x 40 mL). The combined organic extracts were washed with brine, dried over  $\text{MgSO}_4$ , filtered and concentrated *in vacuo*. The crude product was purified by flash column chromatography on silica gel (10 $\rightarrow$ 15% EtOAc/hexanes) to afford allylic alcohol **14** (1.18 g, 62%) as a colorless oil.  $^1\text{H}$  NMR (400 MHz,  $\text{CDCl}_3$ )  $\delta$  6.01 (dd,  $J = 17.1, 10.7$  Hz, 1H), 5.35 (d,  $J = 17.1$  Hz, 1H), 5.14 (d,  $J = 10.7$  Hz, 1H), 4.11 (s, 1H), 2.95-2.68 (m, 4H), 2.56 (s, 1H), 2.09-1.96 (m, 1H), 1.88-1.73 (m, 1H), 1.40 (s, 3H);  $^{13}\text{C}$  NMR (100 MHz,  $\text{CDCl}_3$ )  $\delta$  141.5, 114.2, 75.3, 59.0, 30.5, 30.2, 25.8, 25.6; IR (thin film, NaCl)  $\nu_{\max}$  3468 (br), 3088, 2900, 1857, 1714, 1642, 1417, 1278, 925, 796  $\text{cm}^{-1}$ ; LRMS (EI, H)  $m/z$  calc'd for  $\text{C}_8\text{H}_{14}\text{OS}_2\text{Na}$  [M + Na] 213.1, found 213.2.

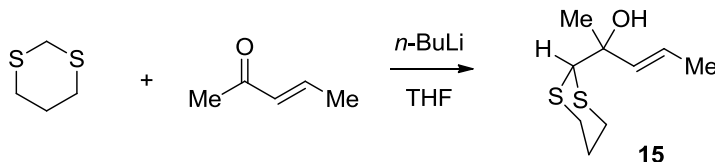

**Synthesis of (*E*)-2-(1,3-dithian-2-yl)pent-3-en-2-ol (15).** To a solution of 1,3-dithiane (1.44 g, 12 mmol) in THF (100 mL) at  $-20\text{ }^{\circ}\text{C}$  was added dropwise *n*-BuLi (4.80 mL, 12 mmol, 2.5 M in hexanes). The resultant clear solution was stirred at the same temperature for 1 h. After cooling down to  $-78\text{ }^{\circ}\text{C}$ , (*E*)-pent-3-en-2-one (976  $\mu\text{L}$ , 841 mg, 10 mmol) was added dropwise via a syringe. The reaction was stirred for 30 min, then



quenched with saturated aqueous  $\text{NH}_4\text{Cl}$  (10 mL) and warmed to ambient temperature. The reaction mixture was further diluted with  $\text{H}_2\text{O}$  (20 mL) and extracted with  $\text{Et}_2\text{O}$  (3 x 40 mL). The combined organic extracts were washed with brine, dried over  $\text{MgSO}_4$ , filtered and concentrated *in vacuo*. The crude product was purified by flash column chromatography on silica gel (10→20%  $\text{EtOAc}$ /hexanes) to afford allylic alcohol **15** (1.54 g, 75%) as a colorless oil.  $^1\text{H}$  NMR (400 MHz,  $\text{CDCl}_3$ )  $\delta$  5.78 (dq,  $J = 15.4, 6.4$  Hz, 1H), 5.63 (d,  $J = 15.4$  Hz, 1H), 4.11 (s, 1H), 2.94-2.72 (m, 4H), 2.48 (s, 1H), 2.10-1.98 (m, 1H), 1.90-1.75 (m, 1H), 1.70 (d,  $J = 6.4$  Hz, 3H), 1.41 (s, 3H);  $^{13}\text{C}$  NMR (100 MHz,  $\text{CDCl}_3$ )  $\delta$  134.5, 125.3, 74.9, 59.9, 30.7, 30.4, 26.1, 25.8, 17.8; IR (thin film, NaCl)  $\nu_{\text{max}}$  3460 (br), 2933, 1671, 1423, 1374, 1337, 1277, 1146, 966, 750  $\text{cm}^{-1}$ ; LRMS (EI, H)  $m/z$  calc'd for  $\text{C}_9\text{H}_{16}\text{OS}_2\text{Na}$  [ $\text{M} + \text{Na}$ ] 227.1, found 227.2.

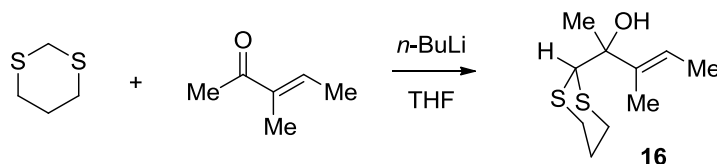

**Synthesis of (E)-2-(1,3-dithian-2-yl)-3-methylpent-3-en-2-ol (16).** To a solution of 1,3-dithiane (721 mg, 6.0 mmol) in THF (40 mL) at  $-20$  °C was added dropwise  $n\text{-BuLi}$  (2.40 mL, 6.0 mmol, 2.5 M in hexanes). The resultant clear solution was stirred at the same temperature for 1 h. After cooling down to  $-78$  °C, (E)-3-methylpent-3-en-2-one (329 mg, 4.0 mmol) was added dropwise via a syringe. The reaction was stirred for 30 min, then quenched with saturated aqueous  $\text{NH}_4\text{Cl}$  (5 mL) and warmed to ambient temperature. The reaction mixture was further diluted with  $\text{H}_2\text{O}$  (10 mL) and extracted with  $\text{Et}_2\text{O}$  (3 x 20 mL). The combined organic extracts were washed with brine, dried over  $\text{MgSO}_4$ , filtered and concentrated *in vacuo*. The crude product was purified by flash column chromatography on silica gel (5→7%  $\text{EtOAc}$ /hexanes) to afford allylic alcohol **16** (799 mg, 91%) as a colorless oil.  $^1\text{H}$  NMR (400 MHz,  $\text{CDCl}_3$ )  $\delta$  5.70 (q,  $J = 6.7$  Hz, 1H), 4.36 (s, 1H), 2.95-2.76 (m, 4H), 2.28 (s, 1H), 2.10-1.98 (m, 1H), 1.87-1.71 (m, 1H), 1.64 (s, 3H), 1.63 (d,  $J = 6.7$  Hz, 3H), 1.43 (s, 3H);  $^{13}\text{C}$  NMR (100 MHz,  $\text{CDCl}_3$ )  $\delta$  137.7, 120.2, 77.7, 58.0, 31.0, 30.8, 25.9, 24.9, 13.4, 12.8; IR (thin film, NaCl)  $\nu_{\text{max}}$  3468 (br), 2982, 2899, 1664, 1423, 1372, 1278, 1078, 839, 617  $\text{cm}^{-1}$ ; LRMS (EI, H)  $m/z$  calc'd for  $\text{C}_{10}\text{H}_{18}\text{OS}_2\text{Na}$  [ $\text{M} + \text{Na}$ ] 241.1, found 241.1.

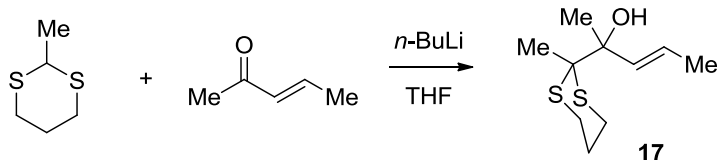

**Synthesis of (*E*)-2-(2-methyl-1,3-dithian-2-yl)pent-3-en-2-ol (**17**).** To a solution of 2-methyl-1,3-dithiane (1.44 mL, 1.61 g, 12 mmol) in THF (100 mL) at  $-20\text{ }^{\circ}\text{C}$  was added dropwise *n*-BuLi (4.80 mL, 12 mmol, 2.5 M in hexanes). The resultant clear solution was stirred at the same temperature for 1 h. After cooling down to  $-78\text{ }^{\circ}\text{C}$ , (*E*)-pent-3-en-2-one (976  $\mu\text{L}$ , 841 mg, 10 mmol) was added dropwise via a syringe. The reaction was stirred for 30 min, then quenched with saturated aqueous  $\text{NH}_4\text{Cl}$  (10 mL) and warmed to ambient temperature. The reaction mixture was further diluted with  $\text{H}_2\text{O}$  (20 mL) and extracted with  $\text{Et}_2\text{O}$  (3 x 40 mL). The combined organic extracts were washed with brine, dried over  $\text{MgSO}_4$ , filtered and concentrated *in vacuo*. The crude product was purified by flash column chromatography on silica gel (5 $\rightarrow$ 10%  $\text{EtOAc}$ /hexanes) to afford allylic alcohol **17** (1.48 g, 68%) as a colorless oil.  $^1\text{H}$  NMR (400 MHz,  $\text{CDCl}_3$ )  $\delta$  5.87-5.71 (m, 2H), 2.96-2.77 (m, 4H), 2.59 (s, 1H), 2.05-1.92 (m, 1H), 1.92-1.79 (m, 1H), 1.74 (s, 3H), 1.73 (d,  $J = 4.9$  Hz, 3H), 1.42 (s, 3H);  $^{13}\text{C}$  NMR (100 MHz,  $\text{CDCl}_3$ )  $\delta$  133.8, 125.6, 78.5, 59.7, 27.1, 27.0, 25.2, 24.9, 23.7, 18.0; IR (thin film, NaCl)  $\nu_{\text{max}}$  3481 (br), 2979, 2932, 1713, 1670, 1449, 1369, 1277, 1069, 970  $\text{cm}^{-1}$ ; LRMS (EI, H)  $m/z$  calc'd for  $\text{C}_{10}\text{H}_{18}\text{OS}_2$  Na [M + Na] 241.1, found 241.1.

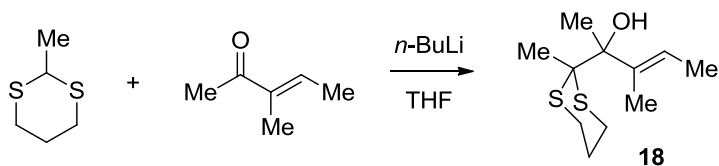

**Synthesis of (*E*)-3-methyl-2-(2-methyl-1,3-dithian-2-yl)pent-3-en-2-ol (**18**).** To a solution of 2-methyl-1,3-dithiane (898  $\mu\text{L}$ , 1.01 g, 7.5 mmol) in THF (50 mL) at  $-20\text{ }^{\circ}\text{C}$  was added dropwise *n*-BuLi (3.0 mL, 7.5 mmol, 2.5 M in hexanes). The resultant clear solution was stirred at the same temperature for 1 h. After cooling down to  $-78\text{ }^{\circ}\text{C}$ , (*E*)-3-methylpent-3-en-2-one (490 mg, 5.0 mmol) was added dropwise via a syringe. The reaction was stirred for 30 min, then quenched with saturated aqueous  $\text{NH}_4\text{Cl}$  (5 mL) and warmed to ambient temperature. The reaction mixture was further diluted with  $\text{H}_2\text{O}$  (10 mL) and extracted with  $\text{Et}_2\text{O}$  (3 x 20 mL). The combined organic extracts were washed

with brine, dried over MgSO<sub>4</sub>, filtered and concentrated *in vacuo*. The crude product was purified by flash column chromatography on silica gel (5→10% EtOAc/hexanes) to afford allylic alcohol **18** (857g, 74%) as a colorless oil. <sup>1</sup>H NMR (400 MHz, CDCl<sub>3</sub>) δ 5.76 (q, *J* = 6.7 Hz, 1H), 2.97-2.76 (m, 4H), 2.73 (s, 1H), 2.07-1.94 (m, 1H), 1.91-1.78 (m, 1H), 1.78 (s, 3H), 1.77 (s, 3H), 1.64 (d, *J* = 6.7 Hz, 3H), 1.56 (s, 3H); <sup>13</sup>C NMR (100 MHz, CDCl<sub>3</sub>) δ 137.5, 123.3, 80.7, 60.9, 27.2, 27.1, 25.6, 25.0, 24.6, 15.4, 13.9; IR (thin film, NaCl) ν<sub>max</sub> 3481 (br), 2980, 2930, 1449, 1369, 1277, 1146, 1068, 911, 751 cm<sup>-1</sup>; LRMS (EI, H) *m/z* calc'd for C<sub>11</sub>H<sub>20</sub>OS<sub>2</sub>Na [M + Na] 255.1, found 255.2.

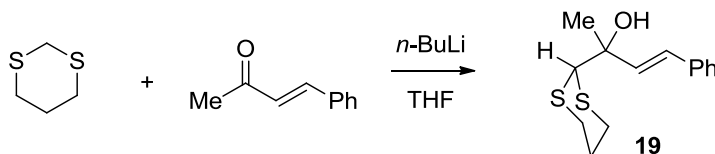

**Synthesis of (E)-2-(1,3-dithian-2-yl)-4-phenylbut-3-en-2-ol (19).** To a solution of 1,3-dithiane (902 mg, 7.5 mmol) in THF (50 mL) at -20 °C was added dropwise *n*-BuLi (3.0 mL, 7.5 mmol, 2.5 M in hexanes). The resultant clear solution was stirred at the same temperature for 1 h. After cooling down to -78 °C, (*E*)-4-phenylbut-3-en-2-one (730 mg, 5.0 mmol) was added dropwise via a syringe. The reaction was stirred for 30 min, then quenched with saturated aqueous NH<sub>4</sub>Cl (5 mL) and warmed to ambient temperature. The reaction mixture was further diluted with H<sub>2</sub>O (10 mL) and extracted with Et<sub>2</sub>O (3 x 20 mL). The combined organic extracts were washed with brine, dried over MgSO<sub>4</sub>, filtered and concentrated *in vacuo*. The crude product was purified by flash column chromatography on silica gel (10→20% EtOAc/hexanes) to afford allylic alcohol **19** (1.16 g, 87%) as a white solid. <sup>1</sup>H NMR (400 MHz, CDCl<sub>3</sub>) δ 7.41 (d, *J* = 7.1 Hz, 2H), 7.31 (appd t, *J* = 7.1 Hz, 2H), 7.23 (t, *J* = 7.1 Hz, 1H), 6.76 (d, *J* = 15.9 Hz, 1H), 6.41 (d, *J* = 15.9 Hz, 1H), 4.22 (s, 3H), 2.95-2.78 (m, 4H), 2.76 (s, 1H), 2.10-2.00 (m, 1H), 1.93-1.80 (m, 1H), 1.55 (s, 3H); <sup>13</sup>C NMR (100 MHz, CDCl<sub>3</sub>) δ 136.7, 133.2, 129.0, 128.7, 127.8, 126.8, 75.5, 59.4, 30.4, 30.1, 26.4, 25.6; IR (thin film, NaCl) ν<sub>max</sub> 3444 (br), 3025, 2900, 2247, 1599, 1494, 1421, 1273, 967, 904 cm<sup>-1</sup>; LRMS (EI, H) *m/z* calc'd for C<sub>14</sub>H<sub>18</sub>OS<sub>2</sub>Na [M + Na] 289.1, found 289.1.

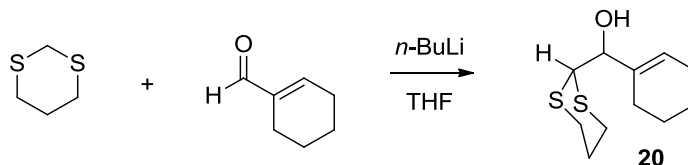

**Synthesis of cyclohex-1-en-1-yl(1,3-dithian-2-yl)methanol (20).** To a solution of 1,3-dithiane (1.80 g, 15 mmol) in THF (100 mL) at  $-20\text{ }^{\circ}\text{C}$  was added dropwise *n*-BuLi (6.0 mL, 15 mmol, 2.5 M in hexanes). The resultant clear solution was stirred at the same temperature for 1 h. After cooling down to  $-78\text{ }^{\circ}\text{C}$ , cyclohex-1-enecarbaldehyde (1.14 mL, 1.10 g, 10 mmol) was added dropwise via a syringe. The reaction was stirred for 30 min, then quenched with saturated aqueous  $\text{NH}_4\text{Cl}$  (10 mL) and warmed to ambient temperature. The reaction mixture was further diluted with  $\text{H}_2\text{O}$  (20 mL) and extracted with  $\text{Et}_2\text{O}$  (3 x 40 mL). The combined organic extracts were washed with brine, dried over  $\text{MgSO}_4$ , filtered and concentrated *in vacuo*. The crude product was purified by flash column chromatography on silica gel (10 $\rightarrow$ 20%  $\text{EtOAc}$ /hexanes) to afford allylic alcohol **20** (2.18 g, 95%) as a colorless oil.  $^1\text{H}$  NMR (400 MHz,  $\text{CDCl}_3$ )  $\delta$  5.77 (s, 1H), 4.13 (d,  $J = 8.7$  Hz, 1H), 3.99 (d,  $J = 8.7$  Hz, 1H), 2.99-2.79 (m, 2H), 2.79-2.67 (m, 2H), 2.48 (s, 1H), 2.17-1.99 (m, 4H), 1.99-1.82 (m, 2H), 1.74-1.47 (m, 4H);  $^{13}\text{C}$  NMR (100 MHz,  $\text{CDCl}_3$ )  $\delta$  135.9, 127.3, 77.2, 49.9, 28.6, 28.0, 25.7, 25.2, 23.2, 22.6, 22.5; IR (thin film, NaCl)  $\nu_{\text{max}}$  3437 (br), 2928, 1668, 1422, 1276, 1139, 1015, 920, 803, 736  $\text{cm}^{-1}$ ; LRMS (EI, H)  $m/z$  calc'd for  $\text{C}_{11}\text{H}_{18}\text{OS}_2\text{Na}$  [ $\text{M} + \text{Na}$ ] 253.1, found 253.2.

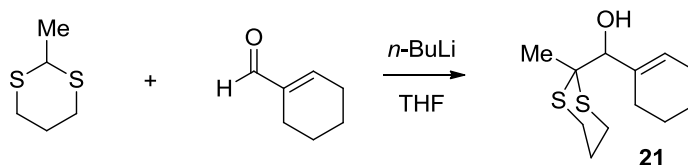

**Synthesis of cyclohex-1-en-1-yl(2-methyl-1,3-dithian-2-yl)methanol (21).** To a solution of 2-methyl-1,3-dithiane (1.80 mL, 2.01 g, 15 mmol) in THF (100 mL) at  $-20\text{ }^{\circ}\text{C}$  was added dropwise *n*-BuLi (6.0 mL, 15 mmol, 2.5 M in hexanes). The resultant clear solution was stirred at the same temperature for 1 h. After cooling down to  $-78\text{ }^{\circ}\text{C}$ , cyclohex-1-enecarbaldehyde (1.14 mL, 1.10 g, 10 mmol) was added dropwise via a syringe. The reaction was stirred for 30 min, then quenched with saturated aqueous  $\text{NH}_4\text{Cl}$  (10 mL) and warmed to ambient temperature. The reaction mixture was further diluted with  $\text{H}_2\text{O}$  (20 mL) and extracted with  $\text{Et}_2\text{O}$  (3 x 40 mL). The combined organic

extracts were washed with brine, dried over MgSO<sub>4</sub>, filtered and concentrated *in vacuo*. The crude product was purified by flash column chromatography on silica gel (10→20% EtOAc/hexanes) to afford allylic alcohol **21** (2.31 g, 95%) as a colorless crystalline solid. <sup>1</sup>H NMR (400 MHz, CDCl<sub>3</sub>) δ 5.79 (s, 1H), 4.30 (s, 1H), 3.03-3.90 (m, 2H), 2.77 (s, 1H), 2.72-2.60 (m, 2H), 2.41-2.29 (m, 1H), 2.11-1.95 (m, 4H), 1.95-1.79 (m, 1H), 1.66-1.49 (m, 4H), 1.43 (s, 3H); <sup>13</sup>C NMR (100 MHz, CDCl<sub>3</sub>) δ 135.1, 127.4, 76.3, 54.1, 27.8, 26.8, 26.1, 25.3, 24.6, 23.4, 23.0, 22.6; IR (thin film, NaCl) ν<sub>max</sub> 3461 (br), 2929, 2666, 1661, 1424, 1368, 1242, 1140, 1027, 921 cm<sup>-1</sup>; LRMS (EI, H) *m/z* calc'd for C<sub>12</sub>H<sub>20</sub>OS<sub>2</sub>Na [M + Na] 267.1, found 267.2.

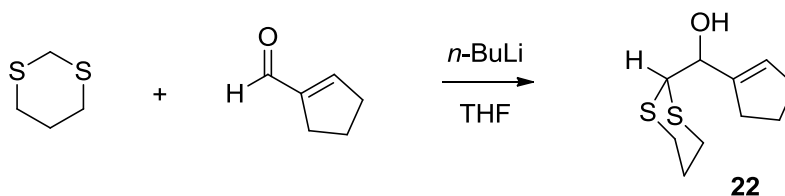

**Synthesis of cyclopent-1-en-1-yl(1,3-dithian-2-yl)methanol (22).** To a solution of 1,3-dithiane (902 mg, 7.5 mmol) in THF (50 mL) at -20 °C was added dropwise *n*-BuLi (3.0 mL, 7.5 mmol, 2.5 M in hexanes). The resultant clear solution was stirred at the same temperature for 1 h. After cooling down to -78 °C, cyclopent-1-enecarbaldehyde (481 mg, 5.0 mmol) was added dropwise via a syringe. The reaction was stirred for 30 min, then quenched with saturated aqueous NH<sub>4</sub>Cl (5 mL) and warmed to ambient temperature. The reaction mixture was further diluted with H<sub>2</sub>O (10 mL) and extracted with Et<sub>2</sub>O (3 x 20 mL). The combined organic extracts were washed with brine, dried over MgSO<sub>4</sub>, filtered and concentrated *in vacuo*. The crude product was purified by flash column chromatography on silica gel (10% EtOAc/hexanes) to afford allylic alcohol **22** (1.03 g, 95%) as a colorless oil. <sup>1</sup>H NMR (400 MHz, CDCl<sub>3</sub>) δ 5.81-5.78 (m, 1H), 4.52 (dd, *J* = 7.4, 3.5 Hz, 1H), 4.02 (d, *J* = 7.4 Hz, 1H), 2.98-2.85 (m, 2H), 2.81-2.69 (m, 2H), 2.50 (d, *J* = 3.5 Hz, 1H), 2.48-2.22 (m, 4H), 2.13-2.01 (m, 1H), 2.00-1.85 (m, 3H); <sup>13</sup>C NMR (100 MHz, CDCl<sub>3</sub>) δ 142.5, 129.8, 72.0, 50.5, 32.2, 30.8, 28.6, 28.0, 25.6, 23.3; IR (thin film, NaCl) ν<sub>max</sub> 3433 (br), 2894, 2844, 1421, 1274, 1042, 1009, 908, 794, 673 cm<sup>-1</sup>; LRMS (EI, H) *m/z* calc'd for C<sub>10</sub>H<sub>16</sub>OS<sub>2</sub>Na [M + Na] 239.1, found 239.1.

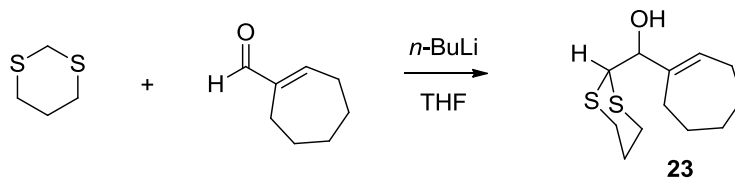

**Synthesis of cyclohept-1-en-1-yl(1,3-dithian-2-yl)methanol (23).** To a solution of 1,3-dithiane (902 mg, 7.5 mmol) in THF (50 mL) at  $-20\text{ }^{\circ}\text{C}$  was added dropwise *n*-BuLi (3.0 mL, 7.5 mmol, 2.5 M in hexanes). The resultant clear solution was stirred at the same temperature for 1 h. After cooling down to  $-78\text{ }^{\circ}\text{C}$ , cyclohept-1-enecarbaldehyde (621 mg, 5.0 mmol) was added dropwise via a syringe. The reaction was stirred for 30 min, then quenched with saturated aqueous  $\text{NH}_4\text{Cl}$  (5 mL) and warmed to ambient temperature. The reaction mixture was further diluted with  $\text{H}_2\text{O}$  (10 mL) and extracted with  $\text{Et}_2\text{O}$  (3 x 20 mL). The combined organic extracts were washed with brine, dried over  $\text{MgSO}_4$ , filtered and concentrated *in vacuo*. The crude product was purified by flash column chromatography on silica gel (10% EtOAc/hexanes) to afford allylic alcohol **23** (1.15 g, 96%) as a colorless oil.  $^1\text{H}$  NMR (400 MHz,  $\text{CDCl}_3$ )  $\delta$  5.89 (t,  $J = 6.4$  Hz, 1H), 4.16 (d,  $J = 8.5$  Hz, 1H), 3.95 (d,  $J = 8.5$  Hz, 1H), 2.97-2.80 (m, 2H), 2.77-2.65 (m, 2H), 2.50 (m, 1H), 2.22-2.00 (m, 5H), 1.97-1.94 (m, 1H), 1.79-1.39 (m, 6H);  $^{13}\text{C}$  NMR (100 MHz,  $\text{CDCl}_3$ )  $\delta$  141.5, 132.0, 78.4, 49.8, 32.4, 28.5, 28.4, 27.9, 27.4, 26.8, 26.6, 25.6; IR (thin film, NaCl)  $\nu_{\text{max}}$  3428 (br), 2917, 2846, 1446, 1275, 1242, 1026, 908, 849, 785  $\text{cm}^{-1}$ ; LRMS (EI, H)  $m/z$  calc'd for  $\text{C}_{12}\text{H}_{20}\text{OS}_2\text{Na}$  [ $\text{M} + \text{Na}$ ] 267.1, found 267.2.

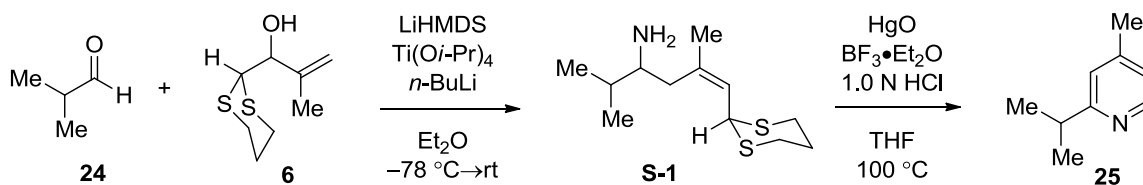

**Synthesis of 2-isopropyl-4-methylpyridine (25).** To a solution of  $\text{Ti(Oi-Pr)}_4$  (296  $\mu\text{L}$ , 284 mg, 1.0 mmol) in  $\text{Et}_2\text{O}$  (4.0 mL) at  $-78\text{ }^{\circ}\text{C}$  was added dropwise *n*-BuLi (800  $\mu\text{L}$ , 2.0 mmol, 2.5 M in hexanes). The resultant orange solution was allowed to warm to  $-50\text{ }^{\circ}\text{C}$  over 20 min. Meanwhile, *N*-TMS imine was prepared by slowly adding LiHMDS (1.0 mL, 1.0 mmol, 1.0 M in THF) to a solution of isobutyraldehyde (91.3  $\mu\text{L}$ , 72.1 mg, 1.0 mmol) in THF (2.0 mL) at  $-78\text{ }^{\circ}\text{C}$  followed by stirring for 10 min. The newly prepared imine was cannulated rapidly to the Ti-solution. The resultant mixture was warmed to  $0\text{ }^{\circ}\text{C}$  over 1 h as it turned from orange color to wine red, and then re-cooled down to  $-78\text{ }^{\circ}\text{C}$ .

A solution of the lithium alkoxide, generated *in situ* via deprotonation of alcohol **6** (95.2 mg, 0.50 mmol) in THF (1.0 mL) with *n*-BuLi (220  $\mu$ L, 0.55 mmol, 2.5 M in hexanes) at  $-78$   $^{\circ}$ C followed by warming to  $0$   $^{\circ}$ C over 10 min, was cannulated dropwise to the Ti-imine complex. The resultant mixture was allowed to warm to ambient temperature overnight. The reaction was quenched with saturated aqueous NaHCO<sub>3</sub> (1.0 mL), stirred rapidly for 10 min, filtered through a pad of Celite, and concentrated *in vacuo* to afford crude **S-1** as a yellow oil.

The crude product was then dissolved in THF (11 mL) and added to a stirred orange suspension of HgO (325 mg, 1.5 mmol) and BF<sub>3</sub>·Et<sub>2</sub>O (188  $\mu$ L, 213 mg, 1.5 mmol) in THF (10 mL); then 1.0 N HCl (4.0 mL) was added, and the reaction was heated in a sealed tube at  $100$   $^{\circ}$ C overnight. After cooling down to ambient temperature, saturated aqueous K<sub>2</sub>CO<sub>3</sub> (10 mL) was added and the mixture was extracted with Et<sub>2</sub>O (3 x 20 mL). The combined organic extracts were washed with brine, dried over MgSO<sub>4</sub>, filtered and concentrated *in vacuo*. The crude product was purified by flash column chromatography on silica gel (2 $\rightarrow$ 5% EtOAc/hexanes with 1% Et<sub>3</sub>N) to afford pyridine **25** (36.1 mg, 53%) as a colorless oil. The spectral data acquired for **25** correspond to those reported in the literature.<sup>6</sup>

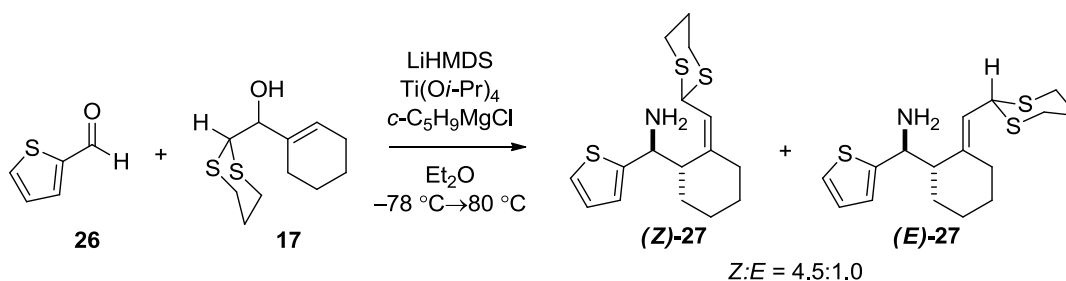

**Synthesis of (S)-((S)-2-((1,3-dithian-2-yl)methylene)cyclohexyl)(thiophen-2-yl)methanamine (27).** To a solution of thiophene-2-carbaldehyde (93.5  $\mu$ L, 112 mg, 1.0 mmol) in Et<sub>2</sub>O (6.0 mL) at  $0$   $^{\circ}$ C in a sealed tube was added slowly LiHMDS (1.0 mL, 1.0 mmol, 1.0 M in THF). The reaction was stirred for 10 min, then cooled down to  $-78$   $^{\circ}$ C. Ti(Oi-Pr)<sub>4</sub> (444  $\mu$ L, 426 mg, 1.5 mmol) was added followed by dropwise addition of *c*-C<sub>5</sub>H<sub>9</sub>MgCl (1.5 mL, 3.0 mmol, 2.0 M in Et<sub>2</sub>O) via a syringe. The resultant yellow solution was allowed to warm to  $-30$   $^{\circ}$ C over 1.5 h as it turned dark brown. A solution of the lithium alkoxide, generated *in situ* via deprotonation of alcohol **17** (115 mg, 0.50 mmol) in THF (1.0 mL) with *n*-BuLi (220  $\mu$ L, 0.55 mmol, 2.5 M in hexanes) at  $-78$   $^{\circ}$ C

followed by warming to 0 °C over 10 min, was cannulated dropwise to the Ti-imine complex. The resultant mixture was allowed to warm to ambient temperature, and then heated at 80 °C for 24 h. After cooling down to ambient temperature, the reaction was quenched with saturated aqueous NaHCO<sub>3</sub> (1.2 mL), stirred rapidly for 10 min, filtered through a pad of Celite, and concentrated *in vacuo*. The crude product was purified by flash column chromatography on silica gel (10→50% EtOAc/hexanes with 1% Et<sub>3</sub>N) to afford homoallylic amines (**Z**)-**27** (94.0 mg, 58%) and (**E**)-**27** (20.0 mg, 12%) as a pale yellow oil (*Z*:*E* = 4.5 :1.0, combined yield 70%). *Spectroscopic data of (Z)-27*: <sup>1</sup>H NMR (400 MHz, CDCl<sub>3</sub>) δ 7.22 (d, *J* = 5.3 Hz, 1H), 6.99-6.91 (m, 2H), 5.36 (d, *J* = 10.1 Hz, 1H), 5.12 (d, *J* = 10.1 Hz, 1H), 3.05-2.90 (m, 2H), 2.83-2.71 (m, 3H), 2.31-2.20 (m, 1H), 2.14-2.03 (m, 2H), 1.89-1.78 (m, 2H), 1.67-1.25 (m, 6H); <sup>13</sup>C NMR (100 MHz, CDCl<sub>3</sub>) δ 149.4, 145.1, 126.2, 124.3, 124.1, 122.5, 50.8, 46.6, 43.4, 33.0, 30.6, 30.4, 29.4, 28.4, 24.9, 21.4; IR (thin film, NaCl)  $\nu_{\max}$  3005, 2931, 2857, 2318, 1650, 1447, 1422, 1275, 896, 701 cm<sup>-1</sup>; LRMS (EI, H) *m/z* calc'd for C<sub>16</sub>H<sub>24</sub>NS<sub>3</sub> [M + H]<sup>+</sup> 326.1, found 326.1. *Spectroscopic data of (E)-27*: <sup>1</sup>H NMR (400 MHz, CDCl<sub>3</sub>) δ 7.22 (d, *J* = 5.1 Hz, 1H), 6.96-6.91 (m, 2H), 5.42 (d, *J* = 9.3 Hz, 1H), 4.97 (d, *J* = 9.3 Hz, 1H), 4.47 (d, *J* = 11.0 Hz, 1H), 3.00-2.88 (m, 2H), 2.86-2.76 (m, 2H), 2.62-2.53 (m, 1H), 2.24-2.16 (m, 1H), 2.14-2.00 (m, 2H), 1.91-1.79 (m, 2H), 1.69-1.31 (m, 7H); <sup>13</sup>C NMR (100 MHz, CDCl<sub>3</sub>) δ 149.1, 145.1, 126.1, 124.3, 124.1, 121.8, 53.9, 50.7, 43.6, 30.6, 30.5, 29.8, 28.1, 26.3, 24.9, 22.0; IR (thin film, NaCl)  $\nu_{\max}$  3005, 2928, 2856, 1735, 1641, 1446, 1372, 1275, 908, 696 cm<sup>-1</sup>; LRMS (EI, H) *m/z* calc'd for C<sub>16</sub>H<sub>24</sub>NS<sub>3</sub> [M + H]<sup>+</sup> 326.1, found 326.1.

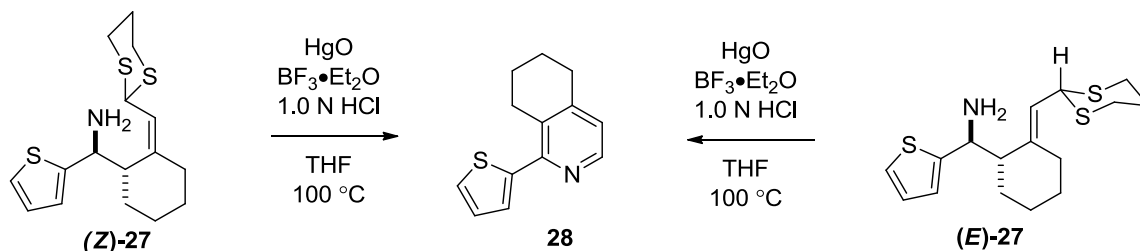

**Synthesis of 1-(thiophen-2-yl)-5,6,7,8-tetrahydroisoquinoline (28).** A solution of (**Z**)-**27** or (**E**)-**27** (23.0 mg, 0.071 mmol) in THF (1.0 mL) was added to a stirred orange suspension of HgO (45.9 mg, 0.212 mmol) and BF<sub>3</sub>·Et<sub>2</sub>O (26.6 μL, 30.1 mg, 0.212 mmol) in THF (1.8 mL); then 1.0 N HCl (0.7 mL) was added, and the reaction was heated in a sealed tube at 100 °C overnight. After cooling down to ambient temperature, saturated aqueous K<sub>2</sub>CO<sub>3</sub> (5.0 mL) was added and the mixture was extracted with Et<sub>2</sub>O (3 x 10



mL). The combined organic extracts were washed with brine, dried over MgSO<sub>4</sub>, filtered and concentrated *in vacuo*. The crude product was purified by flash column chromatography on silica gel (3% EtOAc/hexanes with 1% Et<sub>3</sub>N) to afford pyridine **28** (13.2 mg, 88% and 11.2 mg, 75%, respectively) as a yellow oil. <sup>1</sup>H NMR (400 MHz, CDCl<sub>3</sub>) δ 8.30 (d, *J* = 4.9 Hz, 7.42-7.38 (m, 2H), 7.10 (dd, *J* = 5.3, 3.7 Hz, 1H), 6.90 (d, *J* = 4.9 Hz, 1H), 2.97-2.90 (m, 2H), 2.84-2.77 (m, 2H), 1.89-1.76 (m, 4H); <sup>13</sup>C NMR (100 MHz, CDCl<sub>3</sub>) δ 151.6, 147.2, 145.7, 144.9, 130.1, 127.3, 127.1, 127.0, 122.9, 29.6, 28.1, 23.2, 21.9; IR (thin film, NaCl) ν<sub>max</sub> 3046, 2935, 2861, 1661, 1577, 1436, 1403, 1272, 824, 705 cm<sup>-1</sup>; LRMS (EI, H) *m/z* calc'd for C<sub>13</sub>H<sub>14</sub>NS [M + H]<sup>+</sup> 216.1, found 216.1.

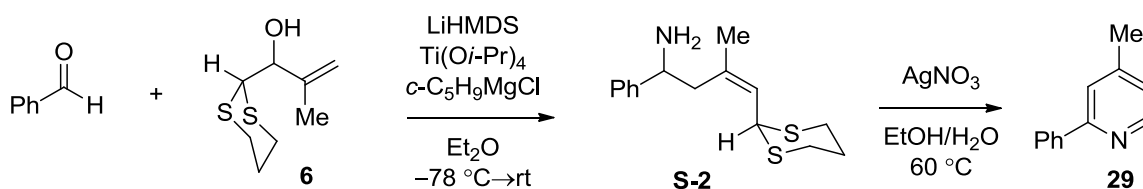

**Synthesis of 4-methyl-2-phenylpyridine (29).** To a solution of benzaldehyde (101 μL, 106 mg, 1.0 mmol) in Et<sub>2</sub>O (6.0 mL) at 0 °C was added slowly LiHMDS (1.0 mL, 1.0 mmol, 1.0 M in THF). The reaction was stirred for 10 min, then cooled down to -78 °C. Ti(Oi-Pr)<sub>4</sub> (444 μL, 426 mg, 1.5 mmol) was added followed by dropwise addition of *c*-C<sub>5</sub>H<sub>9</sub>MgCl (1.5 mL, 3.0 mmol, 2.0 M in Et<sub>2</sub>O) via a syringe. The resultant yellow solution was allowed to warm to -30 °C over 1.5 h as it turned dark brown. A solution of the lithium alkoxide, generated *in situ* via deprotonation of alcohol **6** (95 mg, 0.50 mmol) in THF (1.0 mL) with *n*-BuLi (220 μL, 0.55 mmol, 2.5 M in hexanes) at -78 °C followed by warming to 0 °C over 10 min, was cannulated dropwise to the Ti-imine complex. The resultant mixture was allowed to warm to ambient temperature overnight. The reaction was quenched with saturated aqueous NaHCO<sub>3</sub> (1.2 mL), stirred rapidly for 10 min, filtered through a pad of Celite, and concentrated *in vacuo* to afford crude **S-2** (*Z:E* ≥ 20:1 based on <sup>1</sup>H NMR of the crude) as a yellow oil.

The crude was taken up in EtOH (6.0 mL) and added to a stirred solution of AgNO<sub>3</sub> (255 mg, 1.5 mmol) in EtOH (6.0 mL) and H<sub>2</sub>O (3.0 mL). The reaction was heated in a sealed tube at 60 °C overnight. After cooling down to ambient temperature, pyrrolidine (1.2 mL) was added and the reaction was stirred for 30 min. The reaction was then filtered through a pad of Celite. The filtrate was treated with saturated aqueous K<sub>2</sub>CO<sub>3</sub> (10 mL) and

extracted with Et<sub>2</sub>O (3 x 20 mL). The combined organic extracts were washed with brine, dried over MgSO<sub>4</sub>, filtered and concentrated *in vacuo*. The crude product was purified by flash column chromatography on silica gel (2→5% EtOAc/hexanes with 1% Et<sub>3</sub>N) to afford pyridine **29** (68.4 mg, 80%) as a pale yellow oil. <sup>1</sup>H NMR (400 MHz, CDCl<sub>3</sub>) δ 8.55 (d, *J* = 5.8 Hz, 1H), 8.00-7.95 (m, 2H), 7.55 (s, 1H), 7.50-7.37 (m, 3H), 7.06 (d, *J* = 5.8 Hz, 1H), 2.41 (s, 3H); <sup>13</sup>C NMR (100 MHz, CDCl<sub>3</sub>) δ 157.4, 149.5, 147.7, 139.6, 128.8, 128.7, 126.9, 123.1, 121.5, 21.2; IR (thin film, NaCl) ν<sub>max</sub> 3059, 2956, 1604, 1582, 1557, 1446, 1073, 827, 776, 694 cm<sup>-1</sup>; LRMS (EI, H) *m/z* calc'd for C<sub>12</sub>H<sub>12</sub>N [M + H]<sup>+</sup> 170.1, found 170.2.

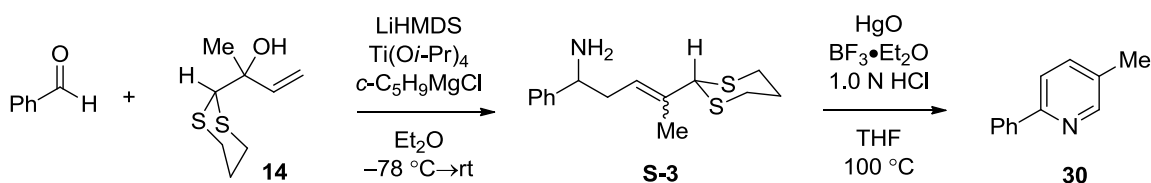

**Synthesis of 5-methyl-2-phenylpyridine (30).** To a solution of benzaldehyde (101 μL, 106 mg, 1.0 mmol) in Et<sub>2</sub>O (6.0 mL) at 0 °C was added slowly LiHMDS (1.0 mL, 1.0 mmol, 1.0 M in THF). The reaction was stirred for 10 min, then cooled down to -78 °C. Ti(Oi-Pr)<sub>4</sub> (444 μL, 426 mg, 1.5 mmol) was added followed by dropwise addition of *c*-C<sub>5</sub>H<sub>9</sub>MgCl (1.5 mL, 3.0 mmol, 2.0 M in Et<sub>2</sub>O) via a syringe. The resultant yellow solution was allowed to warm to -30 °C over 1.5 h as it turned dark brown. A solution of the lithium alkoxide, generated *in situ* via deprotonation of alcohol **14** (95.2 mg, 0.50 mmol) in THF (1.0 mL) with *n*-BuLi (220 μL, 0.55 mmol, 2.5 M in hexanes) at -78 °C followed by warming to 0 °C over 10 min, was cannulated dropwise to the Ti-imine complex. The resultant mixture was allowed to warm to ambient temperature overnight. The reaction was quenched with saturated aqueous NaHCO<sub>3</sub> (1.2 mL), stirred rapidly for 10 min, filtered through a pad of Celite, and concentrated *in vacuo* to afford crude **S-3** (as a mixture of olefin isomers based on <sup>1</sup>H NMR of the crude) as a yellow oil. The crude was taken up in THF (11 mL) and added to a stirred orange suspension of HgO (325 mg, 1.5 mmol) and BF<sub>3</sub>·Et<sub>2</sub>O (188 μL, 213 mg, 1.5 mmol) in THF (10 mL); then 1.0 N HCl (4.0 mL) was added, and the reaction was heated in a sealed tube at 100 °C overnight. After cooling down to ambient temperature, saturated aqueous K<sub>2</sub>CO<sub>3</sub> (10 mL) was added and the mixture was extracted with Et<sub>2</sub>O (3 x 20 mL). The combined organic

extracts were washed with brine, dried over MgSO<sub>4</sub>, filtered and concentrated *in vacuo*. The crude product was purified by flash column chromatography on silica gel (2→5% EtOAc/hexanes with 1% Et<sub>3</sub>N) to afford pyridine **30** (57.7 mg, 68%) as a pale yellow oil. <sup>1</sup>H NMR (400 MHz, CDCl<sub>3</sub>) δ 8.52 (s, 1H), 7.98 (m, 2H), 7.62 (d, *J* = 8.2 Hz, 1H), 7.54 (d, *J* = 8.2 Hz, 1H), 7.49-7.43 (m, 2H), 7.42-7.36 (m, 1H), 2.37 (s, 3H); <sup>13</sup>C NMR (100 MHz, CDCl<sub>3</sub>) δ 154.8, 150.1, 139.5, 137.3, 131.6, 128.7, 128.6, 126.7, 120.3, 18.2; IR (thin film, NaCl) ν<sub>max</sub> 3033, 3003, 2924, 2216, 1599, 1562, 1477, 1379, 905, 692 cm<sup>-1</sup>; LRMS (EI, H) *m/z* calc'd for C<sub>12</sub>H<sub>12</sub>N [M + H]<sup>+</sup> 170.1, found 170.3.

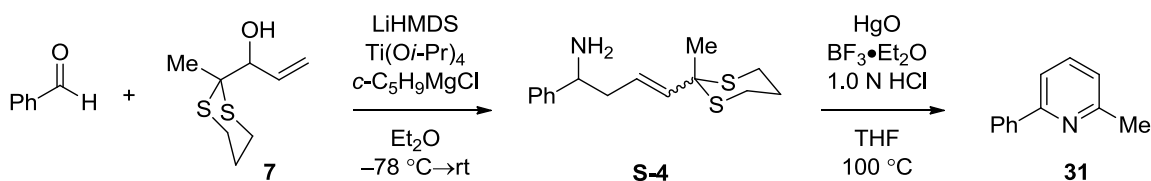

**Synthesis of 2-methyl-6-phenylpyridine (31).** To a solution of benzaldehyde (101 μL, 106 mg, 1.0 mmol) in Et<sub>2</sub>O (6.0 mL) at 0 °C was added slowly LiHMDS (1.0 mL, 1.0 mmol, 1.0 M in THF). The reaction was stirred for 10 min, then cooled down to -78 °C. Ti(O*i*-Pr)<sub>4</sub> (444 μL, 426 mg, 1.5 mmol) was added followed by dropwise addition of *c*-C<sub>5</sub>H<sub>9</sub>MgCl (1.5 mL, 3.0 mmol, 2.0 M in Et<sub>2</sub>O) via a syringe. The resultant yellow solution was allowed to warm to -30 °C over 1.5 h as it turned dark brown. A solution of the lithium alkoxide, generated *in situ* via deprotonation of alcohol **7** (95.2 mg, 0.50 mmol) in THF (1.0 mL) with *n*-BuLi (220 μL, 0.55 mmol, 2.5 M in hexanes) at -78 °C followed by warming to 0 °C over 10 min, was cannulated dropwise to the Ti-imine complex. The resultant mixture was allowed to warm to ambient temperature overnight. The reaction was quenched with saturated aqueous NaHCO<sub>3</sub> (1.2 mL), stirred rapidly for 10 min, filtered through a pad of Celite, and concentrated *in vacuo* to afford crude **S-4** (as a mixture of olefin isomers based on <sup>1</sup>H NMR of the crude) as a yellow oil.

The crude was taken up in THF (11 mL) and added to a stirred orange suspension of HgO (325 mg, 1.5 mmol) and BF<sub>3</sub>·Et<sub>2</sub>O (188 μL, 213 mg, 1.5 mmol) in THF (10 mL); then 1.0 N HCl (4.0 mL) was added, and the reaction was heated in a sealed tube at 100 °C overnight. After cooling down to ambient temperature, saturated aqueous K<sub>2</sub>CO<sub>3</sub> (10 mL) was added and the mixture was extracted with Et<sub>2</sub>O (3 x 20 mL). The combined organic extracts were washed with brine, dried over MgSO<sub>4</sub>, filtered and concentrated *in vacuo*.

The crude product was purified by flash column chromatography on silica gel (2→5% EtOAc/hexanes with 1% Et<sub>3</sub>N) to afford pyridine **31** (48.0 mg, 57%) as a pale yellow oil. <sup>1</sup>H NMR (400 MHz, CDCl<sub>3</sub>) δ 7.99-7.95 (m, 2H), 7.62 (appd t, *J* = 7.8 Hz, 1H), 7.51 (d, *J* = 7.8 Hz, 1H), 7.49-7.42 (m, 2H), 7.42-7.35 (m, 1H), 7.08 (d, *J* = 7.8 Hz, 1H), 2.63 (s, 3H); <sup>13</sup>C NMR (100 MHz, CDCl<sub>3</sub>) δ 158.4, 157.0, 139.8, 136.9, 128.7, 128.7, 127.0, 121.6, 117.6, 24.8; IR (thin film, NaCl)  $\nu_{\max}$  3062, 2924, 1592, 1574, 1459, 1448, 1234, 1161, 1029, 758 cm<sup>-1</sup>; LRMS (EI, H) *m/z* calc'd for C<sub>12</sub>H<sub>12</sub>N [M + H]<sup>+</sup> 170.1, found 170.2.

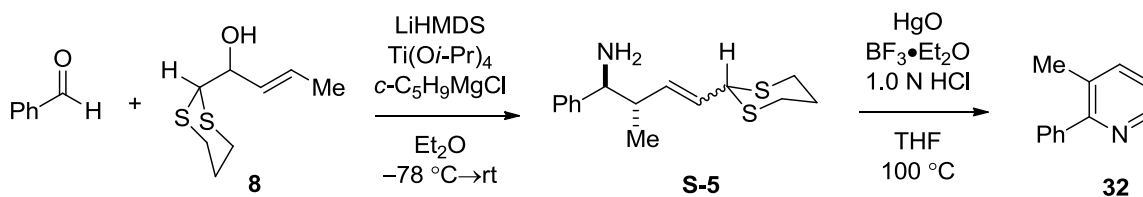

**Synthesis of 3-methyl-2-phenylpyridine (32).** To a solution of benzaldehyde (101  $\mu$ L, 106 mg, 1.0 mmol) in Et<sub>2</sub>O (6.0 mL) at 0 °C was added slowly LiHMDS (1.0 mL, 1.0 mmol, 1.0 M in THF). The reaction was stirred for 10 min, then cooled down to -78 °C. Ti(O*i*-Pr)<sub>4</sub> (444  $\mu$ L, 426 mg, 1.5 mmol) was added followed by dropwise addition of *c*-C<sub>5</sub>H<sub>9</sub>MgCl (1.5 mL, 3.0 mmol, 2.0 M in Et<sub>2</sub>O) via a syringe. The resultant yellow solution was allowed to warm to -30 °C over 1.5 h as it turned dark brown. A solution of the lithium alkoxide, generated *in situ* via deprotonation of alcohol **8** (95.2 mg, 0.50 mmol) in THF (1.0 mL) with *n*-BuLi (220  $\mu$ L, 0.55 mmol, 2.5 M in hexanes) at -78 °C followed by warming to 0 °C over 10 min, was cannulated dropwise to the Ti-imine complex. The resultant mixture was allowed to warm to ambient temperature overnight. The reaction was quenched with saturated aqueous NaHCO<sub>3</sub> (1.2 mL), stirred rapidly for 10 min, filtered through a pad of Celite, and concentrated *in vacuo* to afford crude **S-5** (as a mixture of olefin isomers based on <sup>1</sup>H NMR of the crude) as a yellow oil.

The crude was taken up in THF (11 mL) and added to a stirred orange suspension of PhHgO (325 mg, 1.5 mmol) and BF<sub>3</sub>·Et<sub>2</sub>O (188  $\mu$ L, 213 mg, 1.5 mmol) in THF (10 mL); then 1.0 N HCl (4.0 mL) was added, and the reaction was heated in a sealed tube at 100 °C overnight. After cooling down to ambient temperature, saturated aqueous K<sub>2</sub>CO<sub>3</sub> (10 mL) was added and the mixture was extracted with Et<sub>2</sub>O (3 x 20 mL). The combined organic extracts were washed with brine, dried over MgSO<sub>4</sub>, filtered and concentrated *in vacuo*.

The crude product was purified by flash column chromatography on silica gel (2→5% EtOAc/hexanes with 1% Et<sub>3</sub>N) to afford pyridine **32** (36.0 mg, 43%) as a pale yellow oil. <sup>1</sup>H NMR (400 MHz, CDCl<sub>3</sub>) δ 8.52 (d, *J* = 4.8 Hz, 1H), 7.58 (d, *J* = 8.0 Hz, 1H), 7.55-7.49 (m, 2H), 7.48-7.35 (m, 3H), 7.17 (dd, *J* = 8.0, 4.8 Hz, 1H), 2.35 (s, 3H); <sup>13</sup>C NMR (100 MHz, CDCl<sub>3</sub>) δ 158.7, 147.0, 140.7, 138.5, 130.8, 128.9, 128.2, 127.9, 122.6, 20.1; IR (thin film, NaCl)  $\nu_{\text{max}}$  3056, 2955, 1581, 1565, 1424, 1119, 1020, 785, 748, 701 cm<sup>-1</sup>; LRMS (EI, H) *m/z* calc'd for C<sub>12</sub>H<sub>12</sub>N [M + H]<sup>+</sup> 170.1, found 170.3.

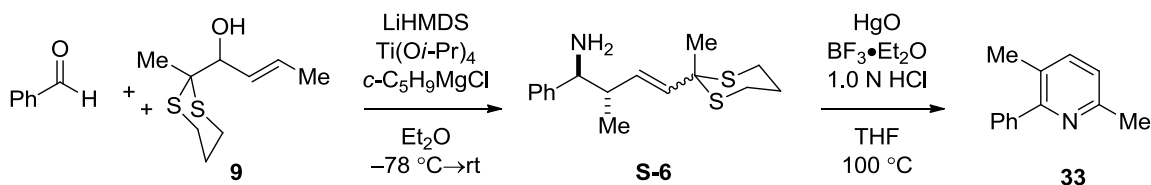

**Synthesis of 3,6-dimethyl-2-phenylpyridine (33).** To a solution of benzaldehyde (101  $\mu$ L, 106 mg, 1.0 mmol) in Et<sub>2</sub>O (6.0 mL) at 0 °C was added slowly LiHMDS (1.0 mL, 1.0 mmol, 1.0 M in THF). The reaction was stirred for 10 min, then cooled down to -78 °C. Ti(Oi-Pr)<sub>4</sub> (444  $\mu$ L, 426 mg, 1.5 mmol) was added followed by dropwise addition of *c*-C<sub>5</sub>H<sub>9</sub>MgCl (1.5 mL, 3.0 mmol, 2.0 M in Et<sub>2</sub>O) via a syringe. The resultant yellow solution was allowed to warm to -30 °C over 1.5 h as it turned dark brown. A solution of the lithium alkoxide, generated *in situ* via deprotonation of alcohol **9** (102 mg, 0.50 mmol) in THF (1.0 mL) with *n*-BuLi (220  $\mu$ L, 0.55 mmol, 2.5 M in hexanes) at -78 °C followed by warming to 0 °C over 10 min, was cannulated dropwise to the Ti-imine complex. The resultant mixture was allowed to warm to ambient temperature overnight. The reaction was quenched with saturated aqueous NaHCO<sub>3</sub> (1.2 mL), stirred rapidly for 10 min, filtered through a pad of Celite, and concentrated *in vacuo* to afford crude **S-6** (as a mixture of olefin isomers based on <sup>1</sup>H NMR of the crude) as a yellow oil.

The crude was taken up in THF (11 mL) and added to a stirred orange suspension of HgO (325 mg, 1.5 mmol) and BF<sub>3</sub>·Et<sub>2</sub>O (188  $\mu$ L, 213 mg, 1.5 mmol) in THF (10 mL); then 1.0 N HCl (4.0 mL) was added, and the reaction was heated in a sealed tube at 100 °C overnight. After cooling down to ambient temperature, saturated aqueous K<sub>2</sub>CO<sub>3</sub> (10 mL) was added and the mixture was extracted with Et<sub>2</sub>O (3 x 20 mL). The combined organic extracts were washed with brine, dried over MgSO<sub>4</sub>, filtered and concentrated *in vacuo*. The crude product was purified by flash column chromatography on silica gel (1→2%

EtOAc/hexanes with 1% Et<sub>3</sub>N) to afford pyridine **33** (74.0 mg, 81%) as a pale yellow oil. <sup>1</sup>H NMR (400 MHz, CDCl<sub>3</sub>) δ 7.52-7.34 (m, 6H), 7.04 (d, *J* = 7.7 Hz, 1H), 2.56 (s, 3H), 2.27 (s, 3H); <sup>13</sup>C NMR (100 MHz, CDCl<sub>3</sub>) δ 158.0, 155.4, 141.0, 138.7, 129.0, 128.2, 127.7, 127.4, 121.7, 24.2, 19.6; IR (thin film, NaCl)  $\nu_{\text{max}}$  2924, 1593, 1570, 1374, 1252, 1128, 1062, 1028, 736, 700 cm<sup>-1</sup>; LRMS (EI, H) *m/z* calc'd for C<sub>13</sub>H<sub>14</sub>N [M + H]<sup>+</sup> 184.1, found 184.2.

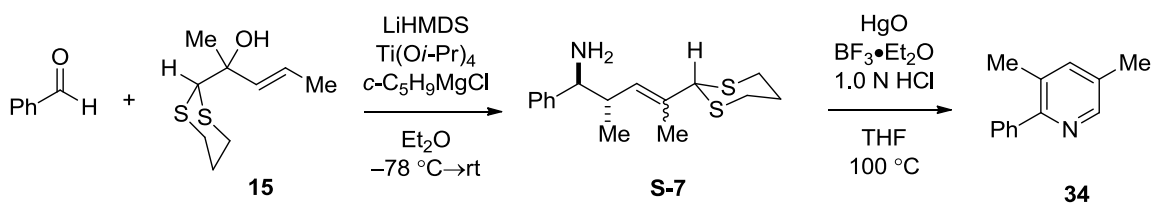

**Synthesis of 3,5-dimethyl-2-phenylpyridine (34).** To a solution of benzaldehyde (101  $\mu$ L, 106 mg, 1.0 mmol) in Et<sub>2</sub>O (6.0 mL) at 0 °C was added slowly LiHMDS (1.0 mL, 1.0 mmol, 1.0 M in THF). The reaction was stirred for 10 min, then cooled down to -78 °C. Ti(Oi-Pr)<sub>4</sub> (444  $\mu$ L, 426 mg, 1.5 mmol) was added followed by dropwise addition of *c*-C<sub>5</sub>H<sub>9</sub>MgCl (1.5 mL, 3.0 mmol, 2.0 M in Et<sub>2</sub>O) via a syringe. The resultant yellow solution was allowed to warm to -30 °C over 1.5 h as it turned dark brown. A solution of the lithium alkoxide, generated *in situ* via deprotonation of alcohol **15** (102 mg, 0.50 mmol) in THF (1.0 mL) with *n*-BuLi (220  $\mu$ L, 0.55 mmol, 2.5 M in hexanes) at -78 °C followed by warming to 0 °C over 10 min, was cannulated dropwise to the Ti-imine complex. The resultant mixture was allowed to warm to ambient temperature overnight. The reaction was quenched with saturated aqueous NaHCO<sub>3</sub> (1.2 mL), stirred rapidly for 10 min, filtered through a pad of Celite, and concentrated *in vacuo* to afford crude **S-7** (as a mixture of olefin isomers based on <sup>1</sup>H NMR of the crude) as a yellow oil.

The crude was taken up in THF (11 mL) and added to a stirred orange suspension of HgO (325 mg, 1.5 mmol) and BF<sub>3</sub>·Et<sub>2</sub>O (188  $\mu$ L, 213 mg, 1.5 mmol) in THF (10 mL); then 1.0 N HCl (4.0 mL) was added, and the reaction was heated in a sealed tube at 100 °C overnight. After cooling down to ambient temperature, saturated aqueous K<sub>2</sub>CO<sub>3</sub> (10 mL) was added and the mixture was extracted with Et<sub>2</sub>O (3 x 20 mL). The combined organic extracts were washed with brine, dried over MgSO<sub>4</sub>, filtered and concentrated *in vacuo*. The crude product was purified by flash column chromatography on silica gel (1→2% EtOAc/hexanes with 1% Et<sub>3</sub>N) to afford pyridine **34** (71.0 mg, 78%) as a pale yellow oil.

$^1\text{H}$  NMR (400 MHz,  $\text{CDCl}_3$ )  $\delta$  8.34 (s, 1H), 7.55-7.30 (m, 6H), 2.33 (s, 3H), 2.31 (s, 3H);  $^{13}\text{C}$  NMR (100 MHz,  $\text{CDCl}_3$ )  $\delta$  156.0, 147.4, 140.6, 139.1, 131.4, 130.1, 129.0, 128.1, 127.7, 19.9, 18.0; IR (thin film, NaCl)  $\nu_{\text{max}}$  2923, 1558, 1464, 1399, 1204, 1151, 1074, 1021, 884, 701  $\text{cm}^{-1}$ ; LRMS (EI, H)  $m/z$  calc'd for  $\text{C}_{13}\text{H}_{14}\text{N}$   $[\text{M} + \text{H}]^+$  184.1, found 184.2.

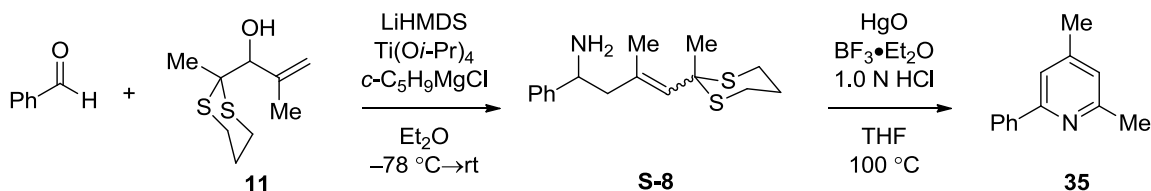

**Synthesis of 2,4-dimethyl-6-phenylpyridine (35).** To a solution of benzaldehyde (101  $\mu\text{L}$ , 106 mg, 1.0 mmol) in  $\text{Et}_2\text{O}$  (6.0 mL) at  $0\text{ } ^\circ\text{C}$  was added slowly LiHMDS (1.0 mL, 1.0 mmol, 1.0 M in THF). The reaction was stirred for 10 min, then cooled down to  $-78\text{ } ^\circ\text{C}$ .  $\text{Ti(Oi-Pr)}_4$  (444  $\mu\text{L}$ , 426 mg, 1.5 mmol) was added followed by dropwise addition of  $\text{c-C}_5\text{H}_9\text{MgCl}$  (1.5 mL, 3.0 mmol, 2.0 M in  $\text{Et}_2\text{O}$ ) via a syringe. The resultant yellow solution was allowed to warm to  $-30\text{ } ^\circ\text{C}$  over 1.5 h as it turned dark brown. A solution of the lithium alkoxide, generated *in situ* via deprotonation of alcohol **11** (102 mg, 0.50 mmol) in THF (1.0 mL) with *n*-BuLi (220  $\mu\text{L}$ , 0.55 mmol, 2.5 M in hexanes) at  $-78\text{ } ^\circ\text{C}$  followed by warming to  $0\text{ } ^\circ\text{C}$  over 10 min, was cannulated dropwise to the Ti-imine complex. The resultant mixture was allowed to warm to ambient temperature overnight. The reaction was quenched with saturated aqueous  $\text{NaHCO}_3$  (1.2 mL), stirred rapidly for 10 min, filtered through a pad of Celite, and concentrated *in vacuo* to afford crude **S-8** (as a mixture of olefin isomers based on  $^1\text{H}$  NMR of the crude) as a yellow oil.

The crude was taken up in THF (11 mL) and added to a stirred orange suspension of HgO (325 mg, 1.5 mmol) and  $\text{BF}_3 \cdot \text{Et}_2\text{O}$  (188  $\mu\text{L}$ , 213 mg, 1.5 mmol) in THF (10 mL); then 1.0 N HCl (4.0 mL) was added, and the reaction was heated in a sealed tube at  $100\text{ } ^\circ\text{C}$  overnight. After cooling down to ambient temperature, saturated aqueous  $\text{K}_2\text{CO}_3$  (10 mL) was added and the mixture was extracted with  $\text{Et}_2\text{O}$  (3 x 20 mL). The combined organic extracts were washed with brine, dried over  $\text{MgSO}_4$ , filtered and concentrated *in vacuo*. The crude product was purified by flash column chromatography on silica gel (1 $\rightarrow$ 5%  $\text{EtOAc}$ /hexanes with 1%  $\text{Et}_3\text{N}$ ) to afford pyridine **35** (73.2 mg, 80%) as a pale yellow oil.  $^1\text{H}$  NMR (400 MHz,  $\text{CDCl}_3$ )  $\delta$  7.97 (d,  $J = 7.2$  Hz, 2H), 7.48 (appd t,  $J = 7.2$  Hz, 2H), 7.44-7.38 (m, 1H), 7.37 (s, 1H), 6.94 (s, 1H), 2.60 (s, 3H), 2.37 (s, 3H);  $^{13}\text{C}$  NMR (100

MHz, CDCl<sub>3</sub>)  $\delta$  158.1, 157.0, 147.7, 140.0, 128.6, 128.5, 127.0, 122.6, 118.8, 24.6, 21.1; IR (thin film, NaCl)  $\nu_{\max}$  2922, 1608, 1556, 1450, 1230, 1031, 848, 756, 733, 695 cm<sup>-1</sup>; LRMS (EI, H)  $m/z$  calc'd for C<sub>13</sub>H<sub>14</sub>N [M + H]<sup>+</sup> 184.1, found 184.2.

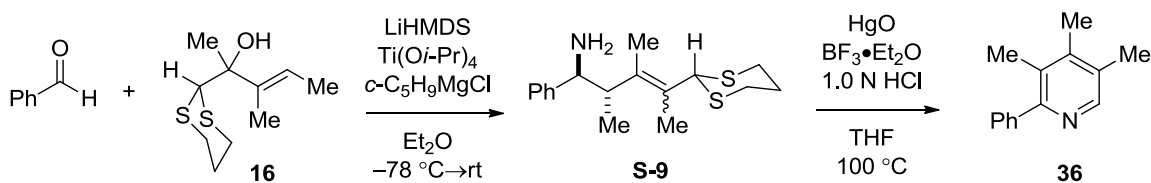

**Synthesis of 3,4,5-trimethyl-2-phenylpyridine (36).** To a solution of benzaldehyde (101  $\mu$ L, 106 mg, 1.0 mmol) in Et<sub>2</sub>O (6.0 mL) at 0 °C was added slowly LiHMDS (1.0 mL, 1.0 mmol, 1.0 M in THF). The reaction was stirred for 10 min, then cooled down to -78 °C. Ti(Oi-Pr)<sub>4</sub> (444  $\mu$ L, 426 mg, 1.5 mmol) was added followed by dropwise addition of *c*-C<sub>5</sub>H<sub>9</sub>MgCl (1.5 mL, 3.0 mmol, 2.0 M in Et<sub>2</sub>O) via a syringe. The resultant yellow solution was allowed to warm to -30 °C over 1.5 h as it turned dark brown. A solution of the lithium alkoxide, generated *in situ* via deprotonation of alcohol **16** (109 mg, 0.50 mmol) in THF (1.0 mL) with *n*-BuLi (220  $\mu$ L, 0.55 mmol, 2.5 M in hexanes) at -78 °C followed by warming to 0 °C over 10 min, was cannulated dropwise to the Ti-imine complex. The resultant mixture was allowed to warm to ambient temperature overnight. The reaction was quenched with saturated aqueous NaHCO<sub>3</sub> (1.2 mL), stirred rapidly for 10 min, filtered through a pad of Celite, and concentrated *in vacuo* to afford crude **S-9** (as a mixture of olefin isomers based on <sup>1</sup>H NMR of the crude) as a yellow oil. The crude was taken up in THF (11 mL) and added to a stirred orange suspension of HgO (325 mg, 1.5 mmol) and BF<sub>3</sub>·Et<sub>2</sub>O (188  $\mu$ L, 213 mg, 1.5 mmol) in THF (10 mL); then 1.0 N HCl (4.0 mL) was added, and the reaction was heated in a sealed tube at 100 °C overnight. After cooling down to ambient temperature, saturated aqueous K<sub>2</sub>CO<sub>3</sub> (10 mL) was added and the mixture was extracted with Et<sub>2</sub>O (3 x 20 mL). The combined organic extracts were washed with brine, dried over MgSO<sub>4</sub>, filtered and concentrated *in vacuo*. The crude product was purified by flash column chromatography on silica gel (1→5% EtOAc/hexanes with 1% Et<sub>3</sub>N) to afford pyridine **36** (81.0 mg, 82%) as a pale yellow oil. <sup>1</sup>H NMR (400 MHz, CDCl<sub>3</sub>)  $\delta$  8.28 (s, 1H), 7.49-7.29 (m, 5H), 2.30 (s, 3H), 2.26 (s, 3H), 2.24 (s, 3H); <sup>13</sup>C NMR (100 MHz, CDCl<sub>3</sub>)  $\delta$  157.2, 147.5, 145.4, 141.9, 130.6, 129.5, 129.3, 128.3, 127.8, 17.5, 17.1, 16.0; IR (thin film, NaCl)  $\nu_{\max}$  2949, 1583, 1463, 1388,



1199, 1128, 1074, 1007, 750, 701  $\text{cm}^{-1}$ ; LRMS (EI, H)  $m/z$  calc'd for  $\text{C}_{14}\text{H}_{16}\text{N}$   $[\text{M} + \text{H}]^+$  198.1, found 198.2.

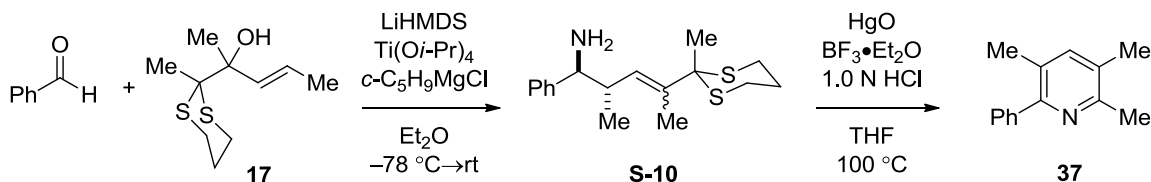

**Synthesis of 2,3,5-trimethyl-6-phenylpyridine (37).** To a solution of benzaldehyde (101  $\mu\text{L}$ , 106 mg, 1.0 mmol) in  $\text{Et}_2\text{O}$  (6.0 mL) at  $0\text{ }^\circ\text{C}$  was added slowly LiHMDS (1.0 mL, 1.0 mmol, 1.0 M in THF). The reaction was stirred for 10 min, then cooled down to  $-78\text{ }^\circ\text{C}$ .  $\text{Ti}(\text{O}i\text{-Pr})_4$  (444  $\mu\text{L}$ , 426 mg, 1.5 mmol) was added followed by dropwise addition of  $c\text{-C}_5\text{H}_9\text{MgCl}$  (1.5 mL, 3.0 mmol, 2.0 M in  $\text{Et}_2\text{O}$ ) via a syringe. The resultant yellow solution was allowed to warm to  $-30\text{ }^\circ\text{C}$  over 1.5 h as it turned dark brown. A solution of the lithium alkoxide, generated *in situ* via deprotonation of alcohol **17** (109 mg, 0.50 mmol) in THF (1.0 mL) with *n*-BuLi (220  $\mu\text{L}$ , 0.55 mmol, 2.5 M in hexanes) at  $-78\text{ }^\circ\text{C}$  followed by warming to  $0\text{ }^\circ\text{C}$  over 10 min, was cannulated dropwise to the Ti-imine complex. The resultant mixture was allowed to warm to ambient temperature overnight. The reaction was quenched with saturated aqueous  $\text{NaHCO}_3$  (1.2 mL), stirred rapidly for 10 min, filtered through a pad of Celite, and concentrated *in vacuo* to afford crude **S-10** (as a mixture of olefin isomers based on  $^1\text{H}$  NMR of the crude) as a yellow oil. The crude was taken up in THF (11 mL) and added to a stirred orange suspension of  $\text{HgO}$  (325 mg, 1.5 mmol) and  $\text{BF}_3 \cdot \text{Et}_2\text{O}$  (188  $\mu\text{L}$ , 213 mg, 1.5 mmol) in THF (10 mL); then 1.0 N HCl (4.0 mL) was added, and the reaction was heated in a sealed tube at  $100\text{ }^\circ\text{C}$  overnight. After cooling down to ambient temperature, saturated aqueous  $\text{K}_2\text{CO}_3$  (10 mL) was added and the mixture was extracted with  $\text{Et}_2\text{O}$  (3 x 20 mL). The combined organic extracts were washed with brine, dried over  $\text{MgSO}_4$ , filtered and concentrated *in vacuo*. The crude product was purified by flash column chromatography on silica gel (1 $\rightarrow$ 5%  $\text{EtOAc}$ /hexanes with 1%  $\text{Et}_3\text{N}$ ) to afford pyridine **37** (44.3 mg, 45%) as a pale yellow oil.  $^1\text{H}$  NMR (400 MHz,  $\text{CDCl}_3$ )  $\delta$  7.52-7.47 (m, 2H), 7.45-7.39 (m, 2H), 7.38-7.32 (m, 1H), 7.30 (s, 1H), 2.52 (s, 3H), 2.29 (s, 3H), 2.27 (s, 3H);  $^{13}\text{C}$  NMR (100 MHz,  $\text{CDCl}_3$ )  $\delta$  155.7, 154.3, 141.2, 140.0, 130.0, 129.3, 128.4, 128.1, 127.8, 22.5, 19.6, 19.0; IR (thin

film, NaCl)  $\nu_{\max}$  2922, 1603, 1559, 1496, 1461, 1240, 1028, 965, 743, 701  $\text{cm}^{-1}$ ; LRMS (EI, H)  $m/z$  calc'd for  $\text{C}_{14}\text{H}_{16}\text{N}$   $[\text{M} + \text{H}]^+$  198.1, found 198.2.

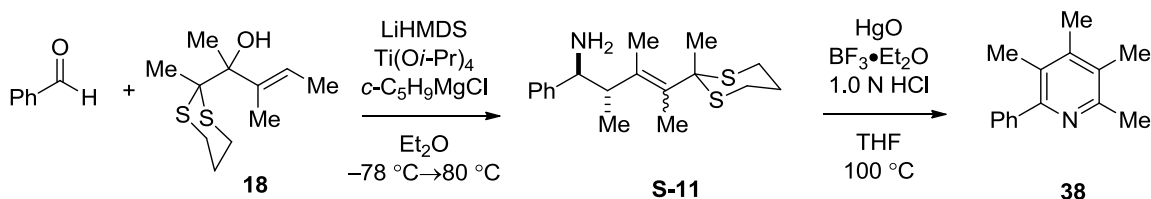

**Synthesis of 2,3,4,5-tetramethyl-6-phenylpyridine (38).** To a solution of benzaldehyde (101  $\mu\text{L}$ , 106 mg, 1.0 mmol) in Et<sub>2</sub>O (6.0 mL) at 0 °C was added slowly LiHMDS (1.0 mL, 1.0 mmol, 1.0 M in THF). The reaction was stirred for 10 min, then cooled down to -78 °C. Ti(Oi-Pr)<sub>4</sub> (444  $\mu\text{L}$ , 426 mg, 1.5 mmol) was added followed by dropwise addition of *c*-C<sub>5</sub>H<sub>9</sub>MgCl (1.5 mL, 3.0 mmol, 2.0 M in Et<sub>2</sub>O) via a syringe. The resultant yellow solution was allowed to warm to -30 °C over 1.5 h as it turned dark brown. A solution of the lithium alkoxide, generated *in situ* via deprotonation of alcohol **18** (116 mg, 0.50 mmol) in THF (1.0 mL) with *n*-BuLi (220  $\mu\text{L}$ , 0.55 mmol, 2.5 M in hexanes) at -78 °C followed by warming to 0 °C over 10 min, was cannulated dropwise to the Ti-imine complex. The resultant mixture was allowed to warm to ambient temperature, and then heated at 80 °C for 24 h. After cooling down to ambient temperature, the reaction was quenched with saturated aqueous NaHCO<sub>3</sub> (1.2 mL), stirred rapidly for 10 min, filtered through a pad of Celite, and concentrated *in vacuo* to afford crude **S-11** (as a mixture of olefin isomers based on <sup>1</sup>H NMR of the crude) as a yellow oil.

The crude was taken up in THF (11 mL) and added to a stirred orange suspension of HgO (325 mg, 1.5 mmol) and BF<sub>3</sub>·Et<sub>2</sub>O (188  $\mu\text{L}$ , 213 mg, 1.5 mmol) in THF (10 mL); then 1.0 N HCl (4.0 mL) was added, and the reaction was heated in a sealed tube at 100 °C overnight. After cooling down to ambient temperature, saturated aqueous K<sub>2</sub>CO<sub>3</sub> (10 mL) was added and the mixture was extracted with Et<sub>2</sub>O (3 x 20 mL). The combined organic extracts were washed with brine, dried over MgSO<sub>4</sub>, filtered and concentrated *in vacuo*. The crude product was purified by flash column chromatography on silica gel (2% EtOAc/hexanes with 1% Et<sub>3</sub>N) to afford pyridine **38** (37.0 mg, 35%) as a pale yellow oil. <sup>1</sup>H NMR (400 MHz, CDCl<sub>3</sub>)  $\delta$  7.49-7.32 (m, 5H), 2.54 (s, 3H), 2.64 (s, 6H), 2.19 (s, 3H); <sup>13</sup>C NMR (100 MHz, CDCl<sub>3</sub>)  $\delta$  155.3, 153.1, 144.8, 141.9, 129.2, 128.4, 128.1, 127.3, 126.8, 23.5, 16.9, 16.1, 15.5; IR (thin film, NaCl)  $\nu_{\max}$  2930, 1684, 1563, 1448, 1407,

1218, 1075, 1021, 747, 701  $\text{cm}^{-1}$ ; LRMS (EI, H)  $m/z$  calc'd for  $\text{C}_{15}\text{H}_{18}\text{N}$   $[\text{M} + \text{H}]^+$  212.1, found 212.2.

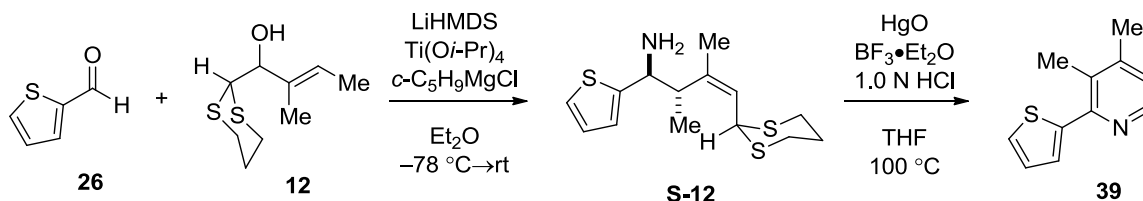

**Synthesis of 3,4-dimethyl-2-(thiophen-2-yl)pyridine (39).** To a solution of thiophene-2-carbaldehyde (93.5  $\mu\text{L}$ , 112 mg, 1.0 mmol) in  $\text{Et}_2\text{O}$  (6.0 mL) at  $0\text{ }^\circ\text{C}$  was added slowly LiHMDS (1.0 mL, 1.0 mmol, 1.0 M in THF). The reaction was stirred for 10 min, then cooled down to  $-78\text{ }^\circ\text{C}$ .  $\text{Ti}(\text{O}i\text{-Pr})_4$  (444  $\mu\text{L}$ , 426 mg, 1.5 mmol) was added followed by dropwise addition of  $c\text{-C}_5\text{H}_9\text{MgCl}$  (1.5 mL, 3.0 mmol, 2.0 M in  $\text{Et}_2\text{O}$ ) via a syringe. The resultant yellow solution was allowed to warm to  $-30\text{ }^\circ\text{C}$  over 1.5 h as it turned dark brown. A solution of the lithium alkoxide, generated *in situ* via deprotonation of alcohol **12** (102 mg, 0.50 mmol) in THF (1.0 mL) with *n*-BuLi (220  $\mu\text{L}$ , 0.55 mmol, 2.5 M in hexanes) at  $-78\text{ }^\circ\text{C}$  followed by warming to  $0\text{ }^\circ\text{C}$  over 10 min, was cannulated dropwise to the Ti-imine complex. The resultant mixture was allowed to warm to ambient temperature and stirred for 24 h. The reaction was quenched with saturated aqueous  $\text{NaHCO}_3$  (1.2 mL), stirred rapidly for 10 min, filtered through a pad of Celite, and concentrated *in vacuo* to afford crude **S-12** ( $Z:E \geq 20:1$  based on  $^1\text{H}$  NMR of the crude) as a yellow oil.

The crude was taken up in THF (11 mL) and added to a stirred orange suspension of  $\text{HgO}$  (325 mg, 1.5 mmol) and  $\text{BF}_3 \cdot \text{Et}_2\text{O}$  (188  $\mu\text{L}$ , 213 mg, 1.5 mmol) in THF (10 mL); then 1.0 N HCl (4.0 mL) was added, and the reaction was heated in a sealed tube at  $100\text{ }^\circ\text{C}$  overnight. After cooling down to ambient temperature, saturated aqueous  $\text{K}_2\text{CO}_3$  (10 mL) was added and the mixture was extracted with  $\text{Et}_2\text{O}$  (3 x 20 mL). The combined organic extracts were washed with brine, dried over  $\text{MgSO}_4$ , filtered and concentrated *in vacuo*. The crude product was purified by flash column chromatography on silica gel (2 $\rightarrow$ 5%  $\text{EtOAc}$ /hexanes with 1%  $\text{Et}_3\text{N}$ ) to afford pyridine **39** (60.2 mg, 64%) as a yellow oil.  $^1\text{H}$  NMR (400 MHz,  $\text{CDCl}_3$ )  $\delta$  8.33 (d,  $J = 5.0$  Hz, 1H), 7.40 (d,  $J = 5.2$  Hz, 1H), 7.34 (d,  $J = 3.6$  Hz, 1H), 7.10 (dd,  $J = 5.2, 3.6$  Hz, 1H), 7.00 (d,  $J = 5.0$  Hz, 1H), 2.45 (s, 3H), 2.35 (s, 3H);  $^{13}\text{C}$  NMR (100 MHz,  $\text{CDCl}_3$ )  $\delta$  151.6, 147.0, 146.4, 144.8, 129.3, 127.2, 127.2,

126.9, 123.7, 20.4, 16.4; IR (thin film, NaCl)  $\nu_{\max}$  2923, 1581, 1560, 1439, 1397, 1275, 1090, 974, 826, 705  $\text{cm}^{-1}$ ; LRMS (EI, H)  $m/z$  calc'd for  $\text{C}_{11}\text{H}_{12}\text{NS}$   $[\text{M} + \text{H}]^+$  190.1, found 190.2.

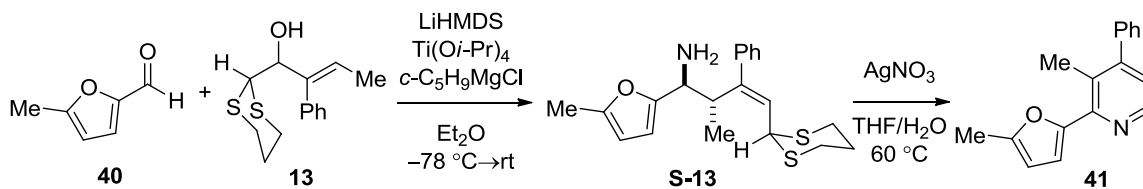

**Synthesis of 3-methyl-2-(5-methylfuran-2-yl)-4-phenylpyridine (41).** To a solution of 5-methylfuran-2-carbaldehyde (100  $\mu\text{L}$ , 110 mg, 1.0 mmol) in  $\text{Et}_2\text{O}$  (6.0 mL) at  $0\text{ }^\circ\text{C}$  was added slowly LiHMDS (1.0 mL, 1.0 mmol, 1.0 M in THF). The reaction was stirred for 10 min, then cooled down to  $-78\text{ }^\circ\text{C}$ .  $\text{Ti}(\text{O}i\text{-Pr})_4$  (444  $\mu\text{L}$ , 426 mg, 1.5 mmol) was added followed by dropwise addition of  $c\text{-C}_5\text{H}_9\text{MgCl}$  (1.5 mL, 3.0 mmol, 2.0 M in  $\text{Et}_2\text{O}$ ) via a syringe. The resultant yellow solution was allowed to warm to  $-30\text{ }^\circ\text{C}$  over 1.5 h as it turned dark brown. A solution of the lithium alkoxide, generated *in situ* via deprotonation of alcohol **13** (133 mg, 0.50 mmol) in THF (1.0 mL) with *n*-BuLi (220  $\mu\text{L}$ , 0.55 mmol, 2.5 M in hexanes) at  $-78\text{ }^\circ\text{C}$  followed by warming to  $0\text{ }^\circ\text{C}$  over 10 min, was cannulated dropwise to the Ti-imine complex. The resultant mixture was allowed to warm to ambient temperature overnight. The reaction was quenched with saturated aqueous  $\text{NaHCO}_3$  (1.2 mL), stirred rapidly for 10 min, filtered through a pad of Celite, and concentrated *in vacuo* to afford crude **S-13** ( $Z:E \geq 20:1$  based on  $^1\text{H}$  NMR of the crude) as a yellow oil.

The crude was taken up in THF (6.0 mL) and added to a stirred solution of  $\text{AgNO}_3$  (255 mg, 1.5 mmol) in THF (6.0 mL) and  $\text{H}_2\text{O}$  (3.0 mL). The reaction was heated in a sealed tube at  $60\text{ }^\circ\text{C}$  overnight. After cooling down to ambient temperature, pyrrolidine (1.2 mL) was added and the reaction was stirred for 30 min. The reaction was then filtered through a pad of Celite. The filtrate was treated with saturated aqueous  $\text{K}_2\text{CO}_3$  (10 mL) and extracted with  $\text{Et}_2\text{O}$  (3 x 20 mL). The combined organic extracts were washed with brine, dried over  $\text{MgSO}_4$ , filtered and concentrated *in vacuo*. The crude product was purified by flash column chromatography on silica gel (2 $\rightarrow$ 5%  $\text{EtOAc}$ /hexanes with 1%  $\text{Et}_3\text{N}$ ) to afford pyridine **41** (63.0 mg, 51%) as a viscous yellow oil.  $^1\text{H}$  NMR (400 MHz,  $\text{CDCl}_3$ )  $\delta$  8.53 (d,  $J = 4.9$  Hz, 1H), 7.48-7.36 (m, 3H), 7.34-7.29 (m, 2H), 7.03 (d,  $J = 4.9$  Hz, 1H),

6.80 (d,  $J = 3.3$  Hz, 1H), 6.15 (d,  $J = 3.3$  Hz, 1H), 2.43 (s, 3H), 2.39 (s, 3H);  $^{13}\text{C}$  NMR (100 MHz,  $\text{CDCl}_3$ )  $\delta$  153.4, 151.8, 151.3, 149.2, 146.7, 140.0, 129.0, 128.5, 128.0, 127.4, 122.7, 113.3, 107.9, 17.9, 14.1; IR (thin film, NaCl)  $\nu_{\text{max}}$  3057, 2925, 1575, 1539, 1463, 1387, 1201, 1006, 763, 703  $\text{cm}^{-1}$ ; LRMS (EI, H)  $m/z$  calc'd for  $\text{C}_{17}\text{H}_{16}\text{NO}$   $[\text{M} + \text{H}]^+$  250.1, found 250.3.

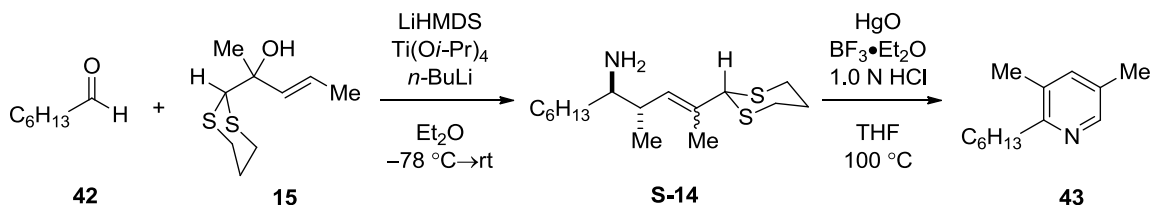

**Synthesis of 2-hexyl-3,5-dimethylpyridine (43).** To a solution of  $\text{Ti}(\text{O}i\text{-Pr})_4$  (296  $\mu\text{L}$ , 284 mg, 1.0 mmol) in  $\text{Et}_2\text{O}$  (4.0 mL) at  $-78^\circ\text{C}$  was added dropwise  $n\text{-BuLi}$  (800  $\mu\text{L}$ , 2.0 mmol, 2.5 M in hexanes). The resultant orange solution was allowed to warm to  $-50^\circ\text{C}$  over 20 min. Meanwhile,  $N\text{-TMS}$  imine was prepared by slowly adding LiHMDS (1.0 mL, 1.0 mmol, 1.0 M in THF) to a solution of heptanal (140  $\mu\text{L}$ , 114 mg, 1.0 mmol) in THF (2.0 mL) at  $-78^\circ\text{C}$  followed by stirring for 10 min. The newly prepared imine was then rapidly transferred to the Ti-solution by cannula. The resultant mixture was warmed to  $0^\circ\text{C}$  over 1 h as it turned from orange color to wine red, and then re-cooled down to  $-78^\circ\text{C}$ . A solution of the lithium alkoxide, generated *in situ* via deprotonation of alcohol **15** (133 mg, 0.50 mmol) in THF (1.0 mL) with  $n\text{-BuLi}$  (220  $\mu\text{L}$ , 0.55 mmol, 2.5 M in hexanes) at  $-78^\circ\text{C}$  followed by warming to  $0^\circ\text{C}$  over 10 min, was cannulated dropwise to the Ti-imine complex. The resultant mixture was allowed to warm to ambient temperature overnight. The reaction was quenched with saturated aqueous  $\text{NaHCO}_3$  (1.0 mL), stirred rapidly for 10 min, filtered through a pad of Celite, and concentrated *in vacuo* to afford crude **S-14** (as a mixture of olefin isomers based on  $^1\text{H}$  NMR of the crude) as a yellow oil.

The crude was taken up in THF (11 mL) and added to a stirred orange suspension of  $\text{HgO}$  (325 mg, 1.5 mmol) and  $\text{BF}_3 \cdot \text{Et}_2\text{O}$  (188  $\mu\text{L}$ , 213 mg, 1.5 mmol) in THF (10 mL); then 1.0 N HCl (4.0 mL) was added, and the reaction was heated in a sealed tube at  $100^\circ\text{C}$  overnight. After cooling down to ambient temperature, saturated aqueous  $\text{K}_2\text{CO}_3$  (10 mL) was added and the mixture was extracted with  $\text{Et}_2\text{O}$  (3 x 20 mL). The combined organic extracts were washed with brine, dried over  $\text{MgSO}_4$ , filtered and concentrated *in vacuo*.

The crude product was purified by flash column chromatography on silica gel (2→5% EtOAc/hexanes with 1% Et<sub>3</sub>N) to afford pyridine **43** (56.0 mg, 58%) as a colorless oil. <sup>1</sup>H NMR (400 MHz, CDCl<sub>3</sub>) δ 8.16 (s, 1H), 7.18 (s, 1H), 2.71 (t, *J* = 7.0 Hz, 2H), 2.25 (s, 3H), 2.23 (s, 3H), 1.69-1.59 (m, 2H), 1.42-1.22 (m, 6H), 0.87 (t, *J* = 7.2 Hz, 3H); <sup>13</sup>C NMR (100 MHz, CDCl<sub>3</sub>) δ 157.8, 146.9, 138.3, 130.1, 130.0, 35.2, 31.8, 29.5, 29.0, 22.6, 18.6, 17.8, 14.1; IR (thin film, NaCl)  $\nu_{\max}$  2956, 2926, 2857, 1568, 1470, 1403, 1261, 1135, 882, 750 cm<sup>-1</sup>; LRMS (EI, H) *m/z* calc'd for C<sub>13</sub>H<sub>22</sub>N [M + H]<sup>+</sup> 192.2, found 192.3.

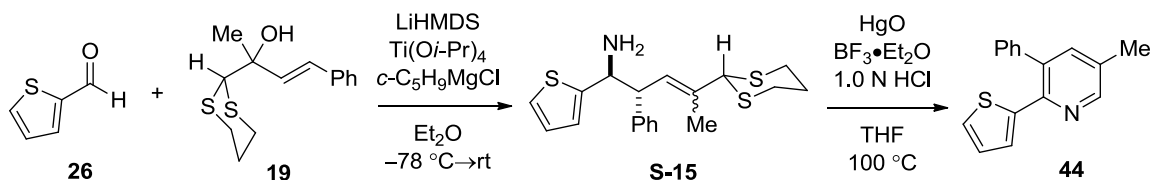

**Synthesis of 5-methyl-3-phenyl-2-(thiophen-2-yl)pyridine (44).** To a solution of thiophene-2-carbaldehyde (93.5  $\mu$ L, 112 mg, 1.0 mmol) in Et<sub>2</sub>O (6.0 mL) at 0 °C was added slowly LiHMDS (1.0 mL, 1.0 mmol, 1.0 M in THF). The reaction was stirred for 10 min, then cooled down to -78 °C. Ti(Oi-Pr)<sub>4</sub> (444  $\mu$ L, 426 mg, 1.5 mmol) was added followed by dropwise addition of *c*-C<sub>5</sub>H<sub>9</sub>MgCl (1.5 mL, 3.0 mmol, 2.0 M in Et<sub>2</sub>O) via a syringe. The resultant yellow solution was allowed to warm to -30 °C over 1.5 h as it turned dark brown. A solution of the lithium alkoxide, generated *in situ* via deprotonation of alcohol **19** (133 mg, 0.50 mmol) in THF (1.0 mL) with *n*-BuLi (220  $\mu$ L, 0.55 mmol, 2.5 M in hexanes) at -78 °C followed by warming to 0 °C over 10 min, was cannulated dropwise to the Ti-imine complex. The resultant mixture was allowed to warm to ambient temperature overnight. The reaction was quenched with saturated aqueous NaHCO<sub>3</sub> (1.2 mL), stirred rapidly for 10 min, filtered through a pad of Celite, and concentrated *in vacuo* to afford crude **S-15** (as a mixture of olefin isomers based on <sup>1</sup>H NMR of the crude) as a yellow oil.

The crude was taken up in THF (11 mL) and added to a stirred orange suspension of HgO (325 mg, 1.5 mmol) and BF<sub>3</sub>·Et<sub>2</sub>O (188  $\mu$ L, 213 mg, 1.5 mmol) in THF (10 mL); then 1.0 N HCl (4.0 mL) was added, and the reaction was heated in a sealed tube at 100 °C overnight. After cooling down to ambient temperature, saturated aqueous K<sub>2</sub>CO<sub>3</sub> (10 mL) was added and the mixture was extracted with Et<sub>2</sub>O (3 x 20 mL). The combined organic extracts were washed with brine, dried over MgSO<sub>4</sub>, filtered and concentrated *in vacuo*.

The crude product was purified by flash column chromatography on silica gel (2→5% EtOAc/hexanes with 1% Et<sub>3</sub>N) to afford pyridine **44** (64.9 mg, 52%) as an orange solid. <sup>1</sup>H NMR (400 MHz, CDCl<sub>3</sub>) δ 8.43 (s, 1H), 7.36-7.29 (m, 4H), 7.27-7.22 (m, 2H), 7.16 (d, *J* = 5.1 Hz, 1H), 6.70 (dd, *J* = 5.1, 3.8 Hz, 1H), 6.41 (d, *J* = 3.8 Hz, 1H), 2.37 (s, 3H); <sup>13</sup>C NMR (100 MHz, CDCl<sub>3</sub>) δ 148.7, 147.7, 144.4, 140.1, 139.3, 134.2, 131.0, 129.2, 128.7, 127.8, 127.4, 127.3, 126.8, 18.0; IR (thin film, NaCl) ν<sub>max</sub> 3026, 2921, 2851, 2252, 1553, 1438, 1268, 1053, 905, 779 cm<sup>-1</sup>; LRMS (EI, H) *m/z* calc'd for C<sub>16</sub>H<sub>14</sub>NS [M + H]<sup>+</sup> 252.1, found 252.2.

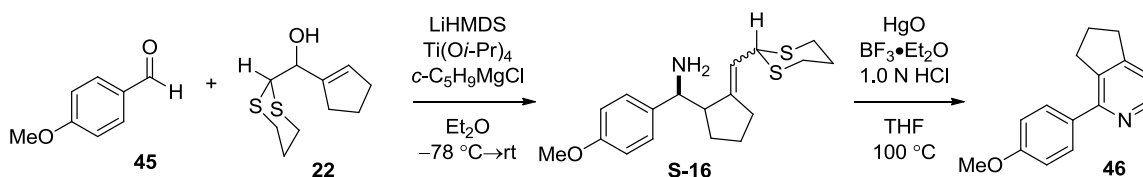

**Synthesis of 1-(4-methoxyphenyl)-6,7-dihydro-5H-cyclopenta[c]pyridine (46).** To a solution of 4-methoxybenzaldehyde (121 μL, 136 mg, 1.0 mmol) in Et<sub>2</sub>O (6.0 mL) at 0 °C was added slowly LiHMDS (1.0 mL, 1.0 mmol, 1.0 M in THF). The reaction was stirred for 10 min, then cooled down to -78 °C. Ti(Oi-Pr)<sub>4</sub> (444 μL, 426 mg, 1.5 mmol) was added followed by dropwise addition of *c*-C<sub>5</sub>H<sub>9</sub>MgCl (1.5 mL, 3.0 mmol, 2.0 M in Et<sub>2</sub>O) via a syringe. The resultant yellow solution was allowed to warm to -30 °C over 1.5 h as it turned dark brown. A solution of the lithium alkoxide, generated *in situ* via deprotonation of alcohol **22** (108 mg, 0.50 mmol) in THF (1.0 mL) with *n*-BuLi (220 μL, 0.55 mmol, 2.5 M in hexanes) at -78 °C followed by warming to 0 °C over 10 min, was cannulated dropwise to the Ti-imine complex. The resultant mixture was allowed to warm to ambient temperature overnight. The reaction was quenched with saturated aqueous NaHCO<sub>3</sub> (1.2 mL), stirred rapidly for 10 min, filtered through a pad of Celite, and concentrated *in vacuo* to afford crude **S-16** (as a mixture of olefin isomers based on <sup>1</sup>H NMR of the crude) as a yellow oil.

The crude was taken up in THF (11 mL) and added to a stirred orange suspension of HgO (325 mg, 1.5 mmol) and BF<sub>3</sub>·Et<sub>2</sub>O (188 μL, 213 mg, 1.5 mmol) in THF (10 mL); then 1.0 N HCl (4.0 mL) was added, and the reaction was heated in a sealed tube at 100 °C overnight. After cooling down to ambient temperature, saturated aqueous K<sub>2</sub>CO<sub>3</sub> (10 mL) was added and the mixture was extracted with Et<sub>2</sub>O (3 x 20 mL). The combined organic extracts were washed with brine, dried over MgSO<sub>4</sub>, filtered and concentrated *in vacuo*.

The crude product was purified by flash column chromatography on silica gel (10% EtOAc/hexanes with 1% Et<sub>3</sub>N) to afford pyridine **46** (71.2 mg, 63%) as a yellow oil. <sup>1</sup>H NMR (400 MHz, CDCl<sub>3</sub>) δ 8.43 (d, *J* = 4.9 Hz, 1H), 7.72 (d, *J* = 8.9 Hz, 1H), 7.10 (d, *J* = 4.9 Hz, 1H), 6.98 (d, *J* = 8.9 Hz, 1H), 3.85 (s, 3H), 3.09 (t, *J* = 7.3 Hz, 2H), 2.95 (t, *J* = 7.4 Hz, 2H), 2.12-2.03 (m, 2H); <sup>13</sup>C NMR (100 MHz, CDCl<sub>3</sub>) δ 159.7, 154.8, 153.9, 147.3, 136.9, 132.8, 129.7, 118.3, 113.6, 55.3, 33.0, 32.8, 25.3; IR (thin film, NaCl) ν<sub>max</sub> 2951, 2836, 1608, 1568, 1510, 1421, 1171, 1029, 833, 762 cm<sup>-1</sup>; LRMS (EI, H) *m/z* calc'd for C<sub>15</sub>H<sub>16</sub>NO [M + H]<sup>+</sup> 226.1, found 226.2.

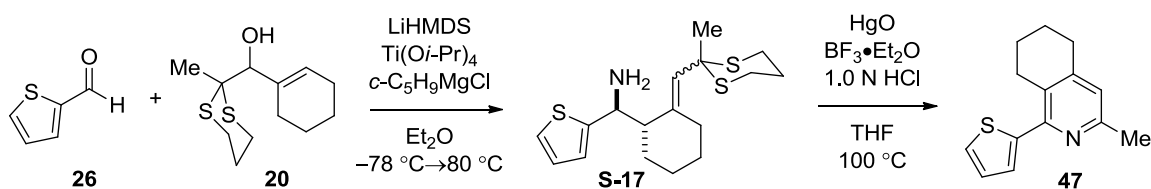

**Synthesis of 3-methyl-1-(thiophen-2-yl)-5,6,7,8-tetrahydroisoquinoline (47).** To a solution of thiophene-2-carbaldehyde (93.5 μL, 112 mg, 1.0 mmol) in Et<sub>2</sub>O (6.0 mL) at 0 °C in a sealed tube was added slowly LiHMDS (1.0 mL, 1.0 mmol, 1.0 M in THF). The reaction was stirred for 10 min, then cooled down to -78 °C. Ti(O*i*-Pr)<sub>4</sub> (444 μL, 426 mg, 1.5 mmol) was added followed by dropwise addition of *c*-C<sub>5</sub>H<sub>9</sub>MgCl (1.5 mL, 3.0 mmol, 2.0 M in Et<sub>2</sub>O) via a syringe. The resultant yellow solution was allowed to warm to -30 °C over 1.5 h as it turned dark brown. A solution of the lithium alkoxide, generated *in situ* via deprotonation of alcohol **20** (122 mg, 0.50 mmol) in THF (1.0 mL) with *n*-BuLi (220 μL, 0.55 mmol, 2.5 M in hexanes) at -78 °C followed by warming to 0 °C over 10 min, was cannulated dropwise to the Ti-imine complex. The resultant mixture was allowed to warm to ambient temperature, and then heated at 80 °C for 24 h. After cooling down to ambient temperature, the reaction was quenched with saturated aqueous NaHCO<sub>3</sub> (1.2 mL), stirred rapidly for 10 min, filtered through a pad of Celite, and concentrated *in vacuo* to afford crude **S-17** (as a mixture of olefin isomers based on <sup>1</sup>H NMR of the crude) as a yellow oil.

The crude was taken up in THF (11 mL) and added to a stirred orange suspension of HgO (325 mg, 1.5 mmol) and BF<sub>3</sub>·Et<sub>2</sub>O (188 μL, 213 mg, 1.5 mmol) in THF (10 mL); then 1.0 N HCl (4.0 mL) was added, and the reaction was heated in a sealed tube at 100 °C overnight. After cooling down to ambient temperature, saturated aqueous K<sub>2</sub>CO<sub>3</sub> (10 mL)



was added and the mixture was extracted with Et<sub>2</sub>O (3 x 20 mL). The combined organic extracts were washed with brine, dried over MgSO<sub>4</sub>, filtered and concentrated *in vacuo*. The crude product was purified by flash column chromatography on silica gel (2→5% EtOAc/hexanes with 1% Et<sub>3</sub>N) to afford pyridine **47** (75.0 mg, 65%) as a yellow oil. <sup>1</sup>H NMR (400 MHz, CDCl<sub>3</sub>) δ 7.39-7.35 (m, 2H), 7.08 (dd, *J* = 4.9, 3.9 Hz, 1H), 6.79 (s, 1H), 2.93-2.83 (m, 2H), 2.83-2.70 (m, 2H), 2.49 (s, 3H), 1.87-1.72 (m, 4H); <sup>13</sup>C NMR (100 MHz, CDCl<sub>3</sub>) δ 154.1, 150.9, 147.3, 144.9, 127.2, 127.0, 126.9, 126.8, 122.4, 30.4, 29.6, 27.7, 23.9, 23.4, 22.1; IR (thin film, NaCl) ν<sub>max</sub> 2931, 1662, 1591, 1557, 1437, 1314, 1232, 858, 795, 701 cm<sup>-1</sup>; LRMS (EI, H) *m/z* calc'd for C<sub>14</sub>H<sub>16</sub>NS [M + H]<sup>+</sup> 230.1, found 230.2.

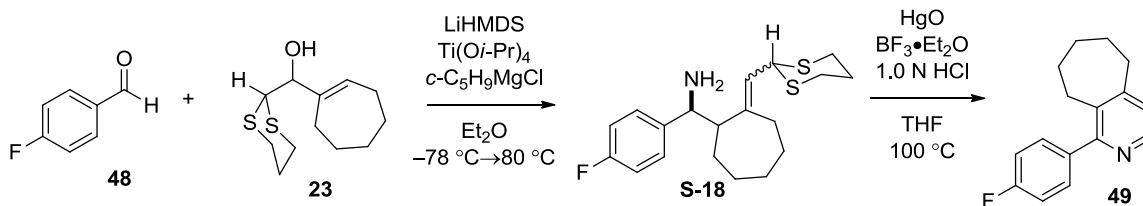

### Synthesis of 1-(4-fluorophenyl)-6,7,8,9-tetrahydro-5H-cyclohepta[c]pyridine (**49**).

To a solution of 4-fluorobenzaldehyde (106 μL, 124 mg, 1.0 mmol) in Et<sub>2</sub>O (6.0 mL) at 0 °C in a sealed tube was added slowly LiHMDS (1.0 mL, 1.0 mmol, 1.0 M in THF). The reaction was stirred for 10 min, then cooled down to -78 °C. Ti(O*i*-Pr)<sub>4</sub> (444 μL, 426 mg, 1.5 mmol) was added followed by dropwise addition of *c*-C<sub>5</sub>H<sub>9</sub>MgCl (1.5 mL, 3.0 mmol, 2.0 M in Et<sub>2</sub>O) via a syringe. The resultant yellow solution was allowed to warm to -30 °C over 1.5 h as it turned dark brown. A solution of the lithium alkoxide, generated *in situ* via deprotonation of alcohol **23** (122 mg, 0.50 mmol) in THF (1.0 mL) with *n*-BuLi (220 μL, 0.55 mmol, 2.5 M in hexanes) at -78 °C followed by warming to 0 °C over 10 min, was cannulated dropwise to the Ti-imine complex. The resultant mixture was allowed to warm to ambient temperature, and then heated at 80 °C for 24 h. After cooling down to ambient temperature, the reaction was quenched with saturated aqueous NaHCO<sub>3</sub> (1.2 mL), stirred rapidly for 10 min, filtered through a pad of Celite, and concentrated *in vacuo* to afford crude **S-18** (as a mixture of olefin isomers based on <sup>1</sup>H NMR of the crude) as a yellow oil.

The crude was taken up in THF (11 mL) and added to a stirred orange suspension of HgO (325 mg, 1.5 mmol) and BF<sub>3</sub>·Et<sub>2</sub>O (188 μL, 213 mg, 1.5 mmol) in THF (10 mL); then 1.0

N HCl (4.0 mL) was added, and the reaction was heated in a sealed tube at 100 °C overnight. After cooling down to ambient temperature, saturated aqueous K<sub>2</sub>CO<sub>3</sub> (10 mL) was added and the mixture was extracted with Et<sub>2</sub>O (3 x 20 mL). The combined organic extracts were washed with brine, dried over MgSO<sub>4</sub>, filtered and concentrated *in vacuo*. The crude product was purified by flash column chromatography on silica gel (2→5% EtOAc/hexanes with 1% Et<sub>3</sub>N) to afford pyridine **49** (88.6 mg, 73%) as a yellow oil. <sup>1</sup>H NMR (400 MHz, CDCl<sub>3</sub>) δ 8.32 (d, *J* = 4.8 Hz, 1H), 7.44-7.37 (m, 2H), 7.14-7.06 (m, 2H), 7.00 (d, *J* = 4.8 Hz, 1H), 2.87-2.74 (m, 4H), 1.90-1.81 (m, 2H), 1.74-1.57 (m, 4H); <sup>13</sup>C NMR (100 MHz, CDCl<sub>3</sub>) δ 162.4 (d, *J*<sub>F</sub> = 246 Hz), 157.1, 153.5, 146.7, 137.4 (d, *J*<sub>F</sub> = 3.4 Hz), 136.4, 130.8 (d, *J*<sub>F</sub> = 8.1 Hz), 123.2, 114.9 (d, *J*<sub>F</sub> = 21.5 Hz), 36.2, 32.3, 30.6, 27.6, 27.4; <sup>19</sup>F NMR (376 MHz, CDCl<sub>3</sub>) δ -114.8; IR (thin film, NaCl) ν<sub>max</sub> 3046, 2922, 2851, 1604, 1414, 1220, 1156, 839, 823, 806 cm<sup>-1</sup>; LRMS (EI, H) *m/z* calc'd for C<sub>16</sub>H<sub>17</sub>FN [M + H]<sup>+</sup> 242.1, found 242.2.

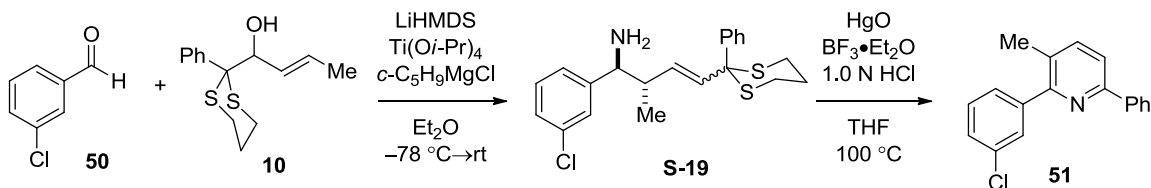

**Synthesis of 2-(3-chlorophenyl)-3-methyl-6-phenylpyridine (51).** To a solution of 3-chlorobenzaldehyde (114 μL, 141 mg, 1.0 mmol) in Et<sub>2</sub>O (6.0 mL) at 0 °C was added slowly LiHMDS (1.0 mL, 1.0 mmol, 1.0 M in THF). The reaction was stirred for 10 min, then cooled down to -78 °C. Ti(Oi-Pr)<sub>4</sub> (444 μL, 426 mg, 1.5 mmol) was added followed by dropwise addition of *c*-C<sub>5</sub>H<sub>9</sub>MgCl (1.5 mL, 3.0 mmol, 2.0 M in Et<sub>2</sub>O) via a syringe. The resultant yellow solution was allowed to warm to -30 °C over 1.5 h as it turned dark brown. A solution of the lithium alkoxide, generated *in situ* via deprotonation of alcohol **10** (133 mg, 0.50 mmol) in THF (1.0 mL) with *n*-BuLi (220 μL, 0.55 mmol, 2.5 M in hexanes) at -78 °C followed by warming to 0 °C over 10 min, was cannulated dropwise to the Ti-imine complex. The resultant mixture was allowed to warm to ambient temperature overnight. The reaction was quenched with saturated aqueous NaHCO<sub>3</sub> (1.2 mL), stirred rapidly for 10 min, filtered through a pad of Celite, and concentrated *in vacuo* to afford crude **S-19** (as a mixture of olefin isomers based on <sup>1</sup>H NMR of the crude) as a yellow oil.

The crude was taken up in THF (11 mL) and added to a stirred orange suspension of HgO (325 mg, 1.5 mmol) and BF<sub>3</sub>·Et<sub>2</sub>O (188 μL, 213 mg, 1.5 mmol) in THF (10 mL); then 1.0 N HCl (4.0 mL) was added, and the reaction was heated in a sealed tube at 100 °C overnight. After cooling down to ambient temperature, saturated aqueous K<sub>2</sub>CO<sub>3</sub> (10 mL) was added and the mixture was extracted with Et<sub>2</sub>O (3 x 20 mL). The combined organic extracts were washed with brine, dried over MgSO<sub>4</sub>, filtered and concentrated *in vacuo*. The crude product was purified by flash column chromatography on silica gel (1% EtOAc/hexanes with 1% Et<sub>3</sub>N) to afford pyridine **51** (76.7 mg, 55%) as a yellow oil. <sup>1</sup>H NMR (400 MHz, CDCl<sub>3</sub>) δ 8.05 (d, *J* = 7.7 Hz, 2H), 7.69-7.64 (m, 3H), 7.56-7.37 (m, 6h), 2.40 (s, 3H); <sup>13</sup>C NMR (100 MHz, CDCl<sub>3</sub>) δ 156.7, 154.7, 142.7, 139.6, 139.2, 134.1, 129.5, 129.3, 129.3, 128.8, 128.7, 128.0, 127.5, 126.8, 119.1, 19.8; IR (thin film, NaCl) ν<sub>max</sub> 3064, 2956, 2926, 2248, 1701, 1585, 1563, 1455, 1077, 905 cm<sup>-1</sup>; LRMS (EI, H) *m/z* calc'd for C<sub>18</sub>H<sub>15</sub>ClN [M + H]<sup>+</sup> 280.1, found 280.4.

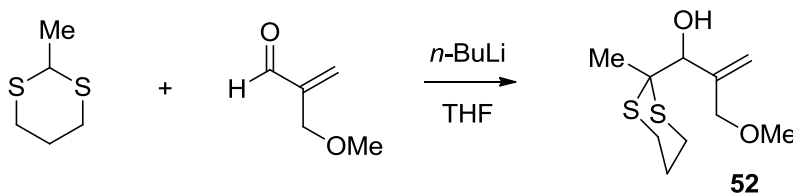

**Synthesis of 2-(methoxymethyl)-1-(2-methyl-1,3-dithian-2-yl)prop-2-en-1-ol (52).** To a solution of 2-methyl-1,3-dithiane (719 μL, 805 mg, 6.0 mmol) in THF (50 mL) at -20 °C was added dropwise *n*-BuLi (2.4 mL, 6.0 mmol, 2.5 M in hexanes). The resultant clear solution was stirred at the same temperature for 1 h. After cooling down to -78 °C, 2-(methoxymethyl)acrylaldehyde (500 mg, 5.0 mmol) was added dropwise via a syringe. The reaction was stirred for 30 min, then quenched with saturated aqueous NH<sub>4</sub>Cl (5 mL) and warmed to ambient temperature. The reaction mixture was further diluted with H<sub>2</sub>O (10 mL) and extracted with Et<sub>2</sub>O (3 x 20 mL). The combined organic extracts were washed with brine, dried over MgSO<sub>4</sub>, filtered and concentrated *in vacuo*. The crude product was purified by flash column chromatography on silica gel (10→30% EtOAc/hexanes) to afford allylic alcohol **52** (960 mg, 82%) as a colorless oil. <sup>1</sup>H NMR (400 MHz, CDCl<sub>3</sub>) δ 5.38 (s, 1H), 5.34 (s, 1H), 4.66 (s, 1H), 4.29 (d, *J* = 12.4 Hz, 1H), 4.08 (d, *J* = 12.4 Hz, 1H), 3.33 (s, 3H), 3.18-3.00 (m, 3H), 2.69-2.60 (m, 2H), 2.13-2.03 (m, 1H), 1.92-1.80 (m, 1H), 1.40 (s, 3H); <sup>13</sup>C NMR (100 MHz, CDCl<sub>3</sub>) δ 142.9, 117.6,

76.1, 71.6, 57.8, 52.8, 26.6, 26.1, 24.2, 22.5; IR (thin film, NaCl)  $\nu_{\max}$  3452 (br), 2924, 2820, 1645, 1448, 1422, 1276, 1189, 908, 754  $\text{cm}^{-1}$ ; LRMS (EI, H)  $m/z$  calc'd for  $\text{C}_{10}\text{H}_{18}\text{O}_2\text{S}_2\text{Na}$  [M + Na] 257.1, found 257.2.

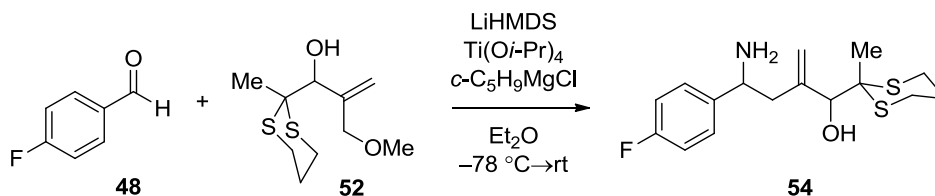

**Synthesis of 4-amino-4-(4-fluorophenyl)-1-(2-methyl-1,3-dithian-2-yl)-2-methylenebutan-1-ol (54).** To a solution of 4-fluorobenzaldehyde (106  $\mu\text{L}$ , 124 mg, 1.0 mmol) in  $\text{Et}_2\text{O}$  (6.0 mL) at  $0\text{ }^\circ\text{C}$  was added slowly LiHMDS (1.0 mL, 1.0 mmol, 1.0 M in THF). The reaction was stirred for 10 min, then cooled down to  $-78\text{ }^\circ\text{C}$ .  $\text{Ti}(\text{O}i\text{-Pr})_4$  (444  $\mu\text{L}$ , 426 mg, 1.5 mmol) was added followed by dropwise addition of  $c\text{-C}_5\text{H}_9\text{MgCl}$  (1.5 mL, 3.0 mmol, 2.0 M in  $\text{Et}_2\text{O}$ ) via a syringe. The resultant yellow solution was allowed to warm to  $-30\text{ }^\circ\text{C}$  over 1.5 h as it turned dark brown. A solution of the lithium alkoxide, generated *in situ* via deprotonation of alcohol **52** (117 mg, 0.50 mmol) in THF (1.0 mL) with  $n\text{-BuLi}$  (220  $\mu\text{L}$ , 0.55 mmol, 2.5 M in hexanes) at  $-78\text{ }^\circ\text{C}$  followed by warming to  $0\text{ }^\circ\text{C}$  over 10 min, was cannulated dropwise to the Ti-imine complex. The resultant mixture was allowed to warm to ambient temperature overnight. The reaction was quenched with saturated aqueous  $\text{NaHCO}_3$  (1.2 mL), stirred rapidly for 10 min, filtered through a pad of Celite, and concentrated *in vacuo*. The crude product was purified by flash column chromatography on silica gel (2 $\rightarrow$ 5% MeOH/DCM with 1% aqueous  $\text{NH}_4\text{OH}$ ) to afford aminoalcohol **54** (as a 1.2:1.0 inseparable mixture of diastereomers based on  $^1\text{H}$  NMR, 131 mg, 80%) as a pale yellow oil. *Spectroscopic data of the major isomer:*  $^1\text{H}$  NMR (400 MHz,  $\text{CDCl}_3$ )  $\delta$  7.38-7.28 (m, 2H), 7.09-6.94 (m, 2H), 5.21 (s, 1H), 4.89 (s, 1H), 4.41 (s, 1H), 4.36 (dd,  $J = 7.5, 4.7$  Hz, 1H), 3.10-2.92 (m, 4H), 2.88-2.71 (m, 2H), 2.38 (dd,  $J = 13.5, 7.5$  Hz, 2H), 2.10-1.89 (m, 3H), 1.53 (s, 3H);  $^{13}\text{C}$  NMR (100 MHz,  $\text{CDCl}_3$ )  $\delta$  161.8 (d,  $J_{\text{F}} = 246$  Hz), 143.1, 140.8 (d,  $J_{\text{F}} = 3.1$  Hz), 127.9 (d,  $J_{\text{F}} = 7.9$  Hz), 119.6, 115.1 (d,  $J_{\text{F}} = 21.2$  Hz), 78.7, 54.1, 53.7, 44.5, 26.9, 26.3, 24.6, 24.2;  $^{19}\text{F}$  NMR (376 MHz,  $\text{CDCl}_3$ )  $\delta$  -115.4. *Spectroscopic data of the minor isomer:*  $^1\text{H}$  NMR (400 MHz,  $\text{CDCl}_3$ )  $\delta$  7.38-7.28 (m, 2H), 7.09-6.94 (m, 2H), 5.30 (s, 1H), 5.21 (s, 1H), 4.41 (s, 1H), 3.94 (dd,  $J = 10.5, 3.6$  Hz, 1H), 3.10-2.92 (m, 2H), 2.88-2.71 (m, 4H), 2.54 (dd,  $J = 13.5, 3.6$  Hz,

2H), 2.10-1.89 (m, 3H), 1.57 (s, 3H);  $^{13}\text{C}$  NMR (100 MHz,  $\text{CDCl}_3$ )  $\delta$  161.9 (d,  $J_{\text{F}} = 246$  Hz), 145.7, 142.0 (d,  $J_{\text{F}} = 3.1$  Hz), 127.4 (d,  $J_{\text{F}} = 7.9$  Hz), 118.9, 115.4 (d,  $J_{\text{F}} = 21.2$  Hz), 78.9, 56.7, 53.6, 43.9, 27.0, 26.4, 24.8, 24.6;  $^{19}\text{F}$  NMR (376 MHz,  $\text{CDCl}_3$ )  $\delta$  -115.9. *Spectroscopic data of the mixture:* IR (thin film, NaCl)  $\nu_{\text{max}}$  3070, 2917, 1602, 1507, 1421, 1218, 908, 868, 751, 677  $\text{cm}^{-1}$ ; LRMS (EI, H)  $m/z$  calc'd for  $\text{C}_{16}\text{H}_{23}\text{FNOS}_2$  [ $\text{M} + \text{H}$ ] $^+$  328.1, found 328.3.

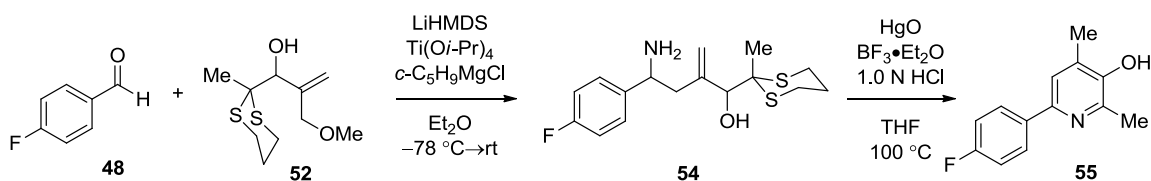

**Synthesis of 6-(4-fluorophenyl)-2,4-dimethylpyridin-3-ol (55).** To a solution of 4-fluorobenzaldehyde (106  $\mu\text{L}$ , 124 mg, 1.0 mmol) in  $\text{Et}_2\text{O}$  (6.0 mL) at  $0\text{ }^\circ\text{C}$  was added slowly LiHMDS (1.0 mL, 1.0 mmol, 1.0 M in THF). The reaction was stirred for 10 min, then cooled down to  $-78\text{ }^\circ\text{C}$ .  $\text{Ti}(\text{O}i\text{-Pr})_4$  (444  $\mu\text{L}$ , 426 mg, 1.5 mmol) was added followed by dropwise addition of  $c\text{-C}_5\text{H}_9\text{MgCl}$  (1.5 mL, 3.0 mmol, 2.0 M in  $\text{Et}_2\text{O}$ ) via a syringe. The resultant yellow solution was allowed to warm to  $-30\text{ }^\circ\text{C}$  over 1.5 h as it turned dark brown. A solution of the lithium alkoxide, generated *in situ* via deprotonation of alcohol **52** (117 mg, 0.50 mmol) in THF (1.0 mL) with  $n\text{-BuLi}$  (220  $\mu\text{L}$ , 0.55 mmol, 2.5 M in hexanes) at  $-78\text{ }^\circ\text{C}$  followed by warming to  $0\text{ }^\circ\text{C}$  over 10 min, was cannulated dropwise to the Ti-imine complex. The resultant mixture was allowed to warm to ambient temperature overnight. The reaction was quenched with saturated aqueous  $\text{NaHCO}_3$  (1.2 mL), stirred rapidly for 10 min, filtered through a pad of Celite, and concentrated *in vacuo* to afford crude **54** (as a mixture of diastereomers based on  $^1\text{H}$  NMR of the crude) as a yellow oil.

The crude was taken up in THF (11 mL) and added to a stirred orange suspension of  $\text{HgO}$  (325 mg, 1.5 mmol) and  $\text{BF}_3 \cdot \text{Et}_2\text{O}$  (188  $\mu\text{L}$ , 213 mg, 1.5 mmol) in THF (10 mL); then 1.0 N HCl (4.0 mL) was added, and the reaction was heated in a sealed tube at  $100\text{ }^\circ\text{C}$  overnight. After cooling down to ambient temperature, saturated aqueous  $\text{K}_2\text{CO}_3$  (10 mL) was added and the mixture was extracted with  $\text{Et}_2\text{O}$  (3 x 20 mL). The combined organic extracts were washed with brine, dried over  $\text{MgSO}_4$ , filtered and concentrated *in vacuo*. The crude product was purified by flash column chromatography on silica gel (10 $\rightarrow$ 40%  $\text{EtOAc}$ /hexanes with 1%  $\text{Et}_3\text{N}$ ) to afford pyridine **55** (55.0 mg, 51%) as a yellow solid.  $^1\text{H}$

NMR (400 MHz, CDCl<sub>3</sub>) δ 7.83-7.76 (m, 2H), 7.27 (d, *J* = 14.4 Hz, 1H), 7.08 (appd t, *J* = 8.7 Hz, 2H), 2.54 (s, 3H), 2.29 (s, 3H); <sup>13</sup>C NMR (100 MHz, CDCl<sub>3</sub>) δ 162.9 (d, *J*<sub>F</sub> = 247 Hz), 148.3, 148.1, 144.6, 135.8 (d, *J*<sub>F</sub> = 3.0 Hz), 132.5, 128.1 (d, *J*<sub>F</sub> = 8.1 Hz), 120.8, 115.4 (d, *J*<sub>F</sub> = 21.5 Hz), 19.2, 15.8; <sup>19</sup>F NMR (376 MHz, CDCl<sub>3</sub>) δ -115.1; IR (thin film, NaCl) ν<sub>max</sub> 3675, 3053, 2987, 1605, 1512, 1468, 1421, 1220, 1066, 837 cm<sup>-1</sup>; LRMS (EI, H) *m/z* calc'd for C<sub>13</sub>H<sub>12</sub>FNO [M + H]<sup>+</sup> 218.1, found 218.2.

---

1. Watson, S. P.; Eastham, J. F. *J. Organometal. Chem.* **1967**, *9*, 165.
2. Clinch, K.; Marquez, C. J.; Parrott, M. J.; Ramage, R. *Tetrahedron* **1989**, *45*, 239.
3. Biocryst Pharmaceuticals, Inc. *etc.* Heterocyclic Compounds as Janus Kinase Inhibitors. WO/2011/031554, March 17, 2011.
4. Naya, A.; Ishikawa, M.; Matsuda, K.; Ohwaki, K.; Saeki, T.; Noguchi, K.; Ohtake, N. *Bioorg. Med. Chem.* **2003**, *11*, 875.
5. Strong, H. L.; Cortes, D. A.; Ahmed, Z. Process for the Manufacture of 2-Alkoxyethylacrolein. U.S. Patent 5,281,713, January 25, 1994.
6. Ishihara, M.; Tsuneya, T.; Shiga, M.; Kawashima, S.; Yamagishi, K.; Yoshida, F.; Sato, H.; Uneyama, K. *J. Agric. Food Chem.* **1992**, *40*, 1647.

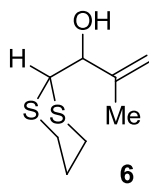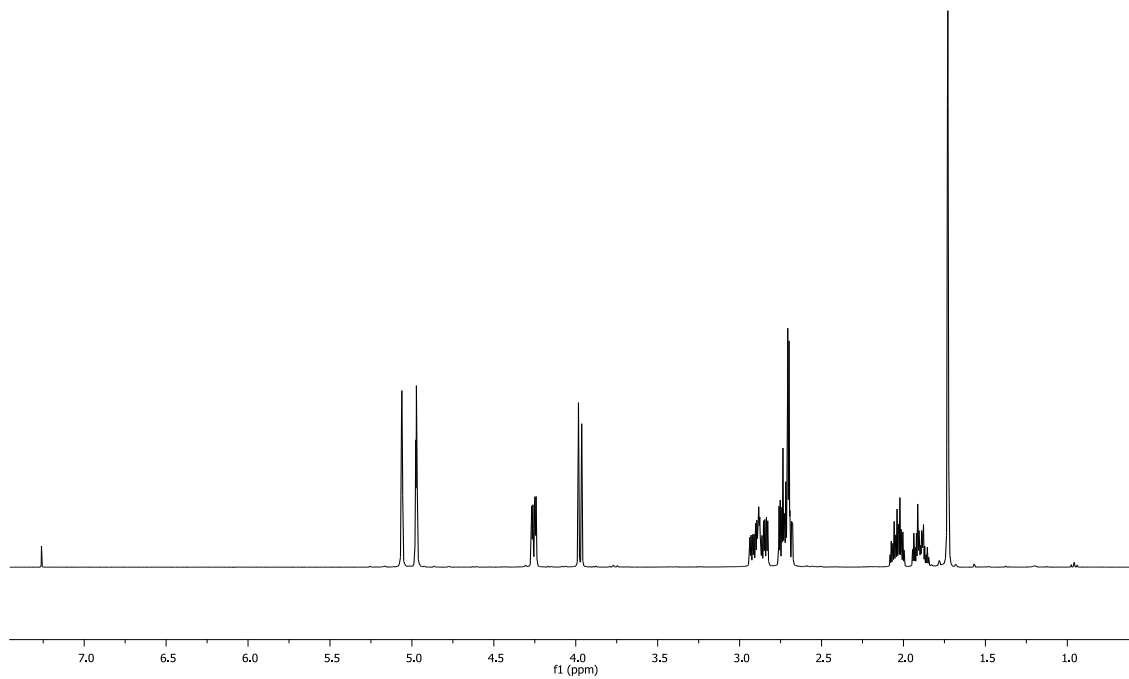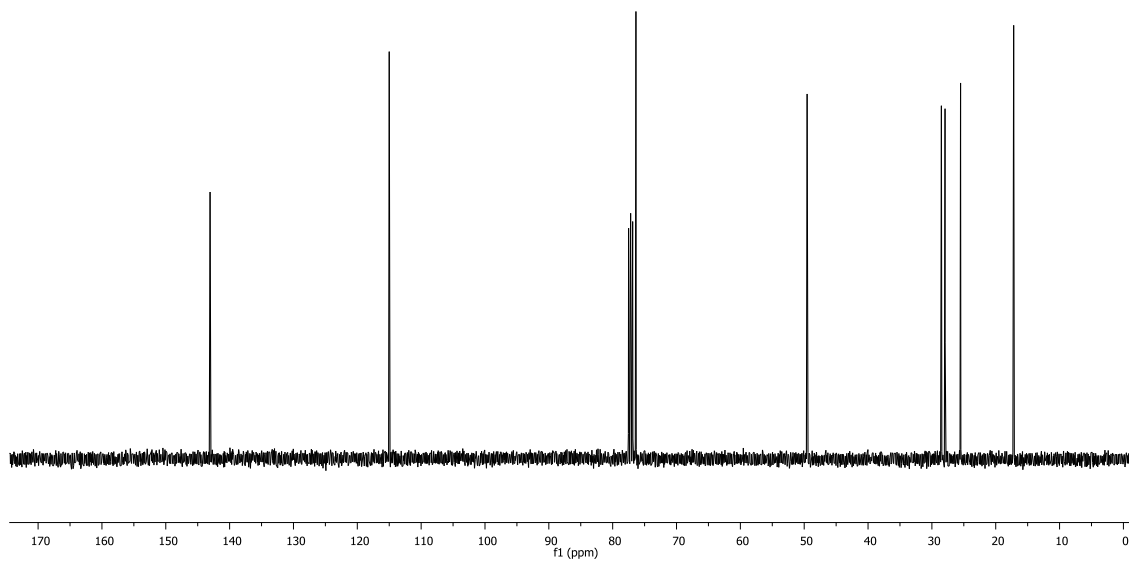

$^1\text{H}$  NMR (400 MHz) and  $^{13}\text{C}$  NMR (100 MHz) of compound **6**

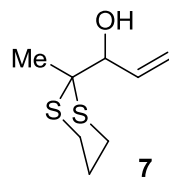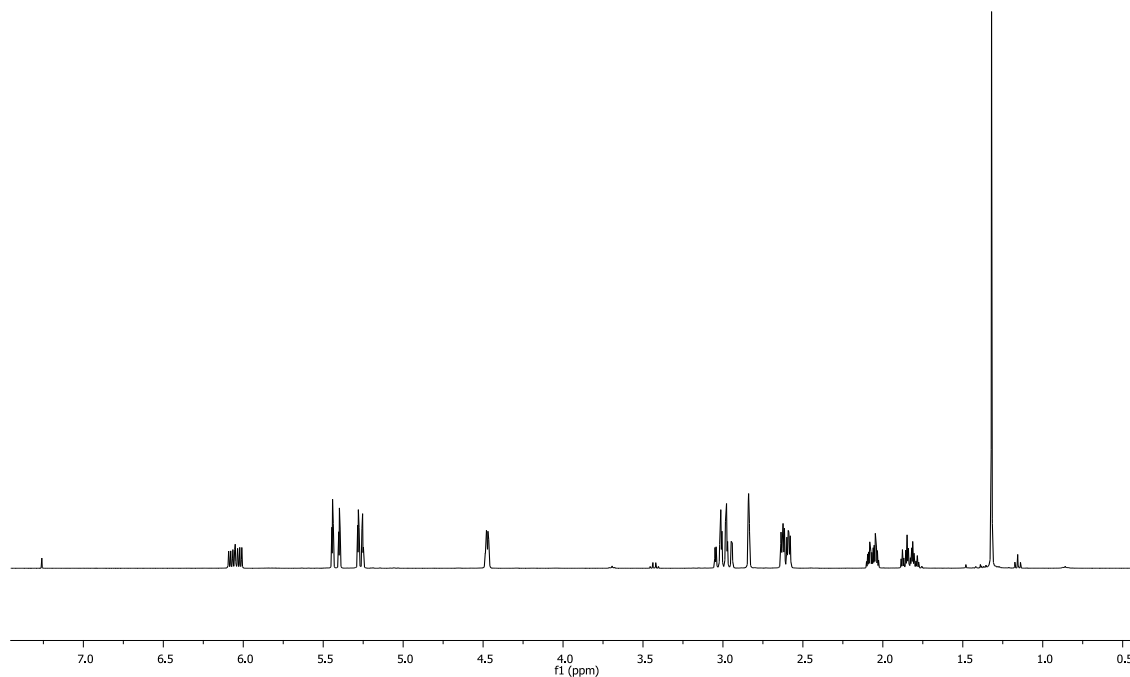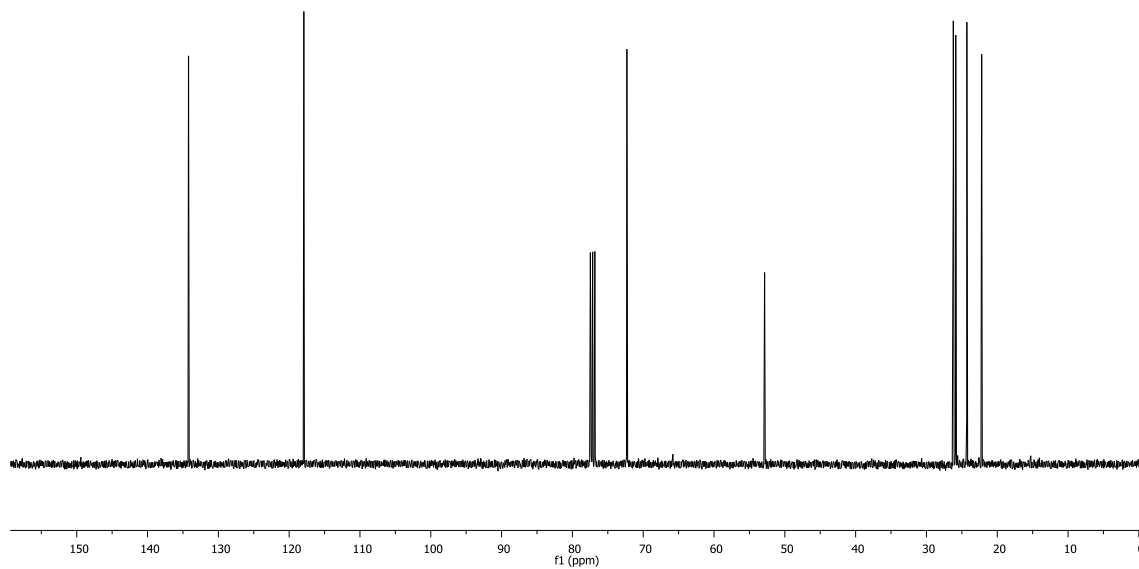

$^1\text{H}$  NMR (400 MHz) and  $^{13}\text{C}$  NMR (100 MHz) of compound 7



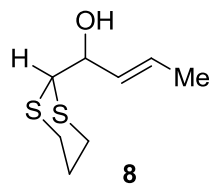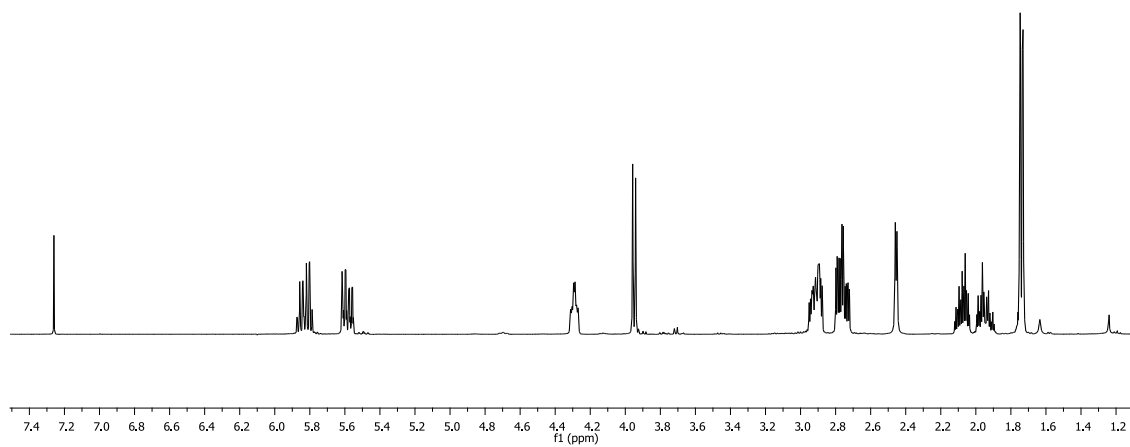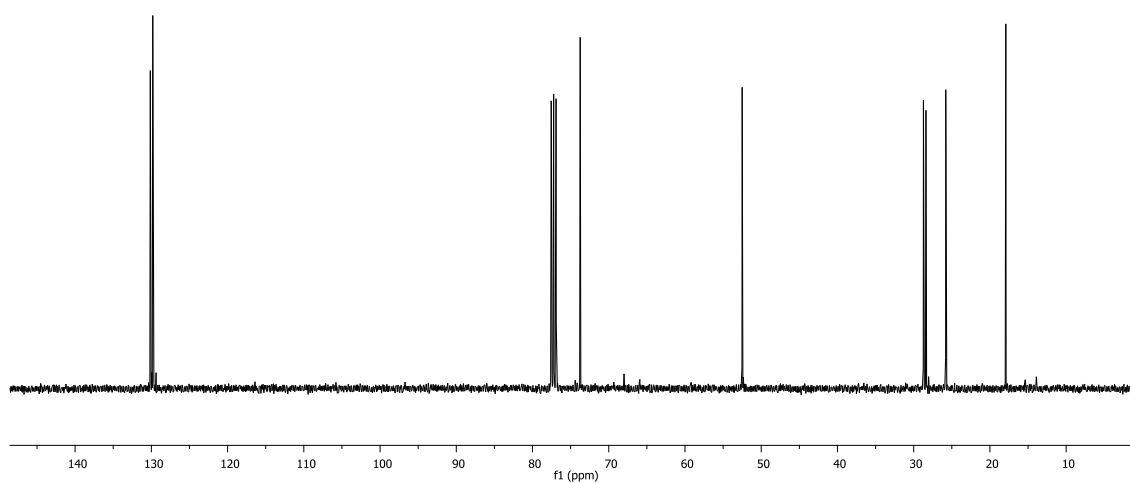

<sup>1</sup>H NMR (400 MHz) and <sup>13</sup>C NMR (100 MHz) of compound **8**

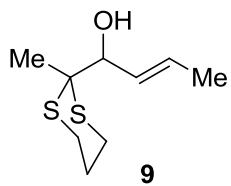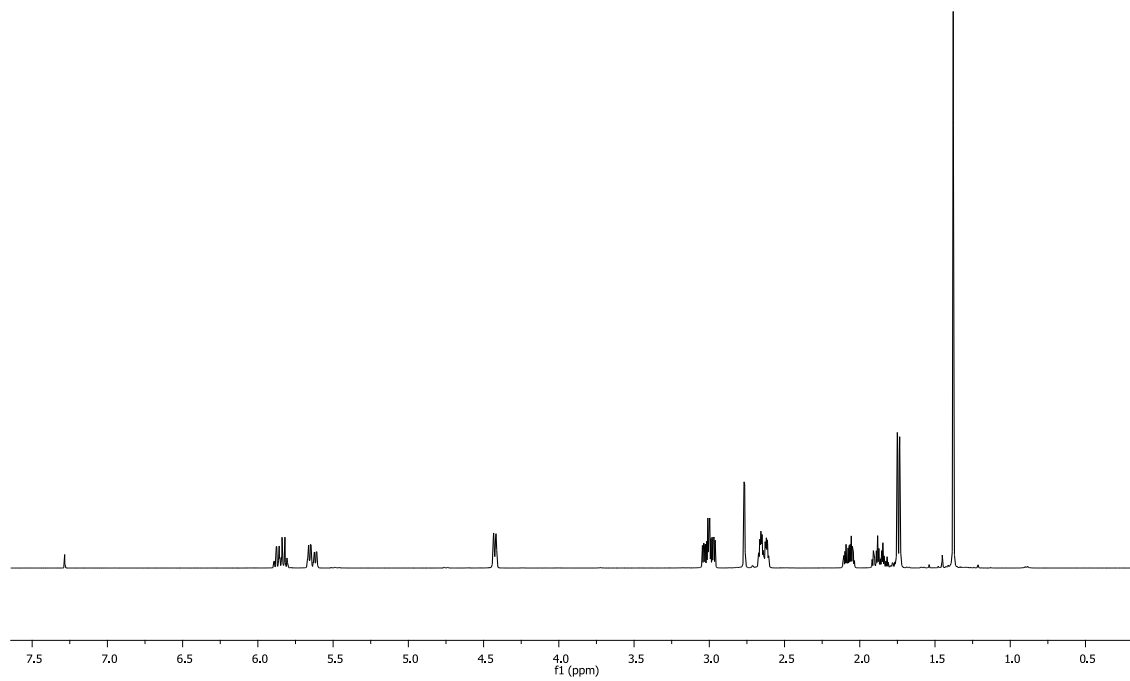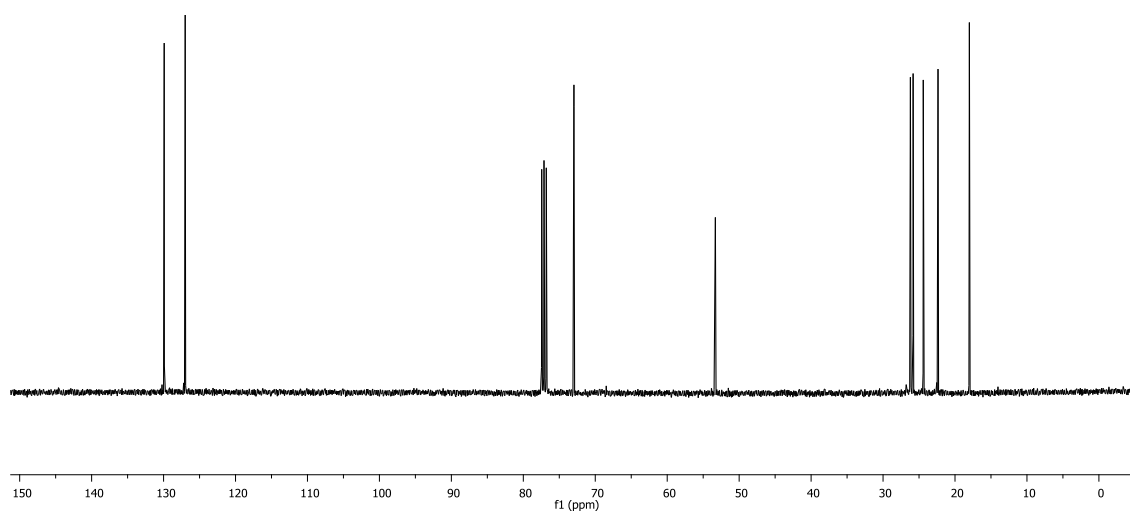

$^1\text{H}$  NMR (400 MHz) and  $^{13}\text{C}$  NMR (100 MHz) of compound **9**

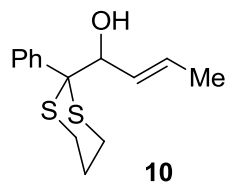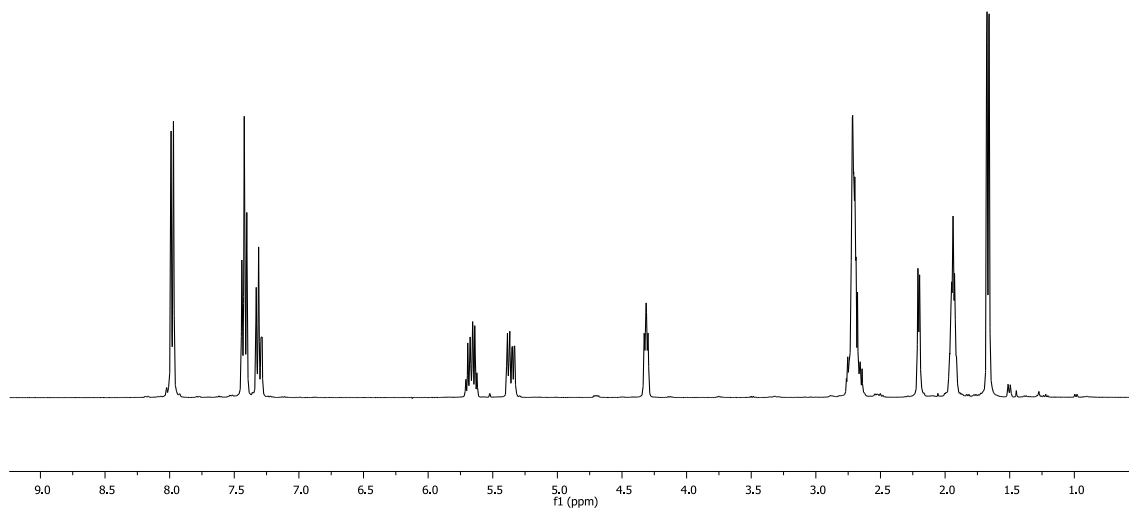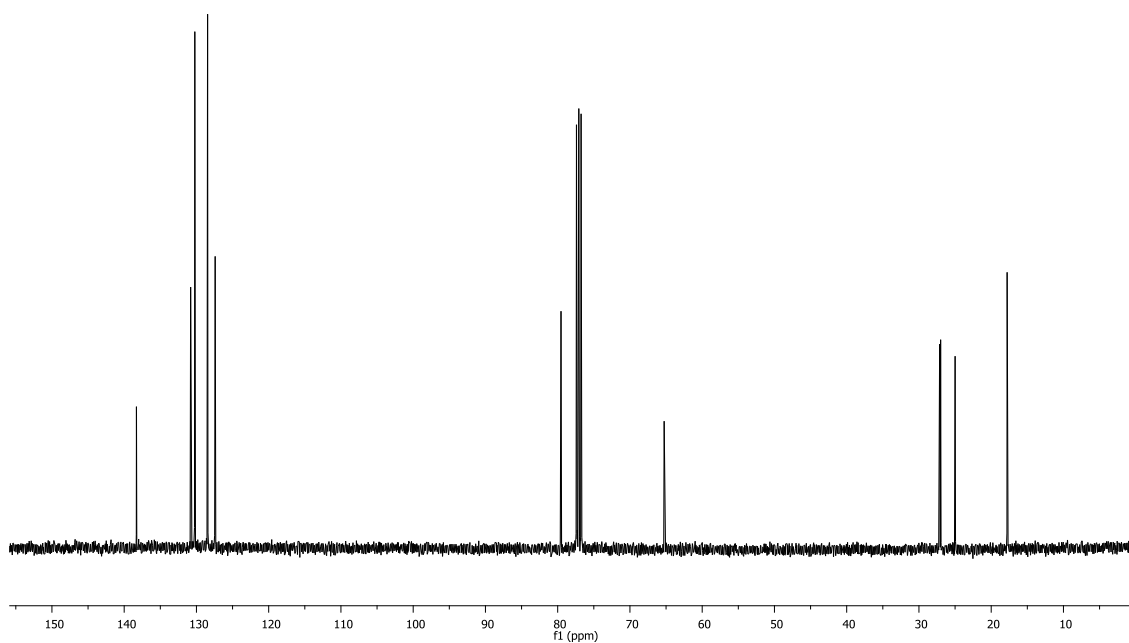

<sup>1</sup>H NMR (400 MHz) and <sup>13</sup>C NMR (100 MHz) of compound **10**

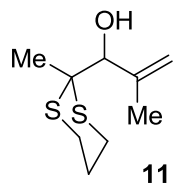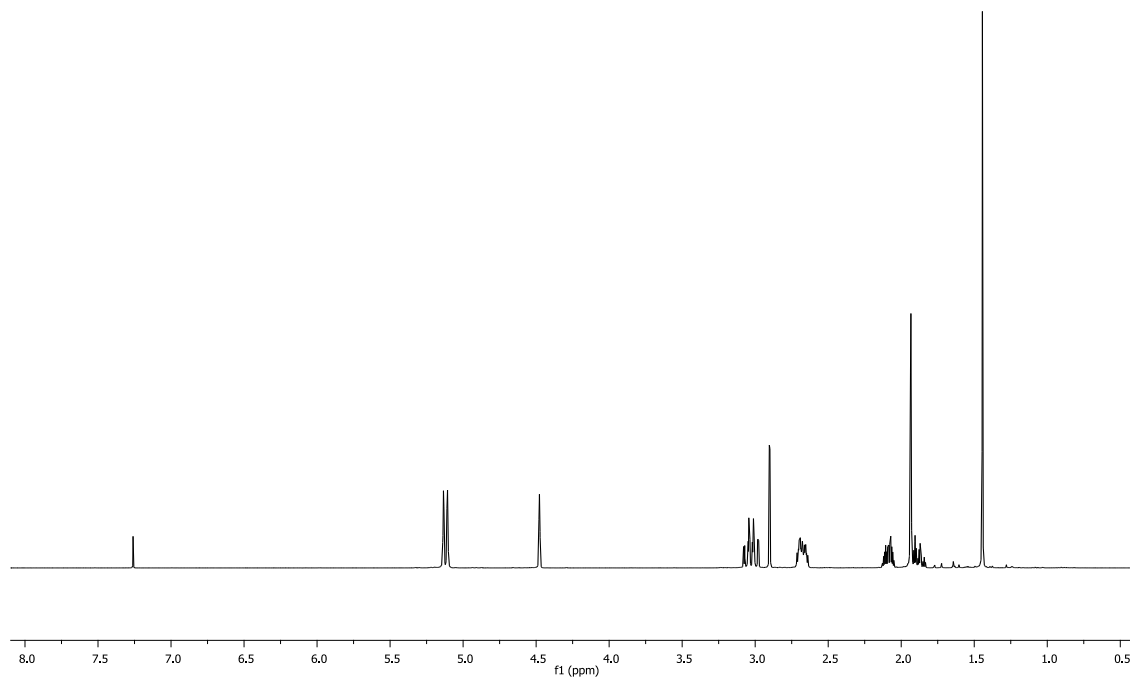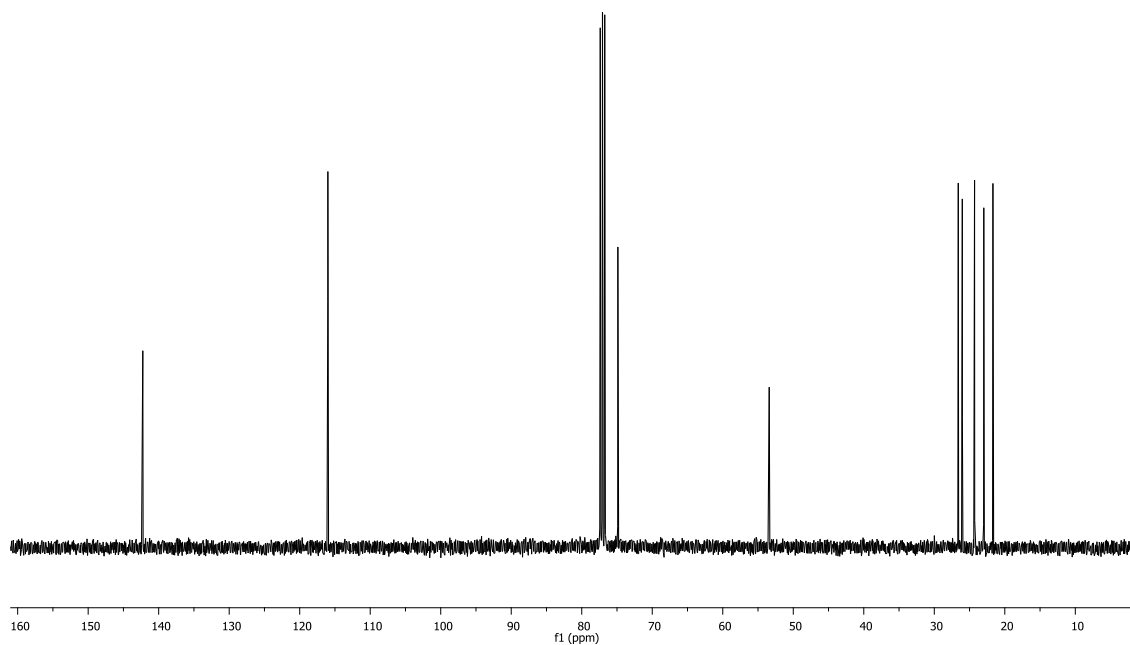

<sup>1</sup>H NMR (400 MHz) and <sup>13</sup>C NMR (100 MHz) of compound **11**

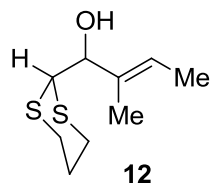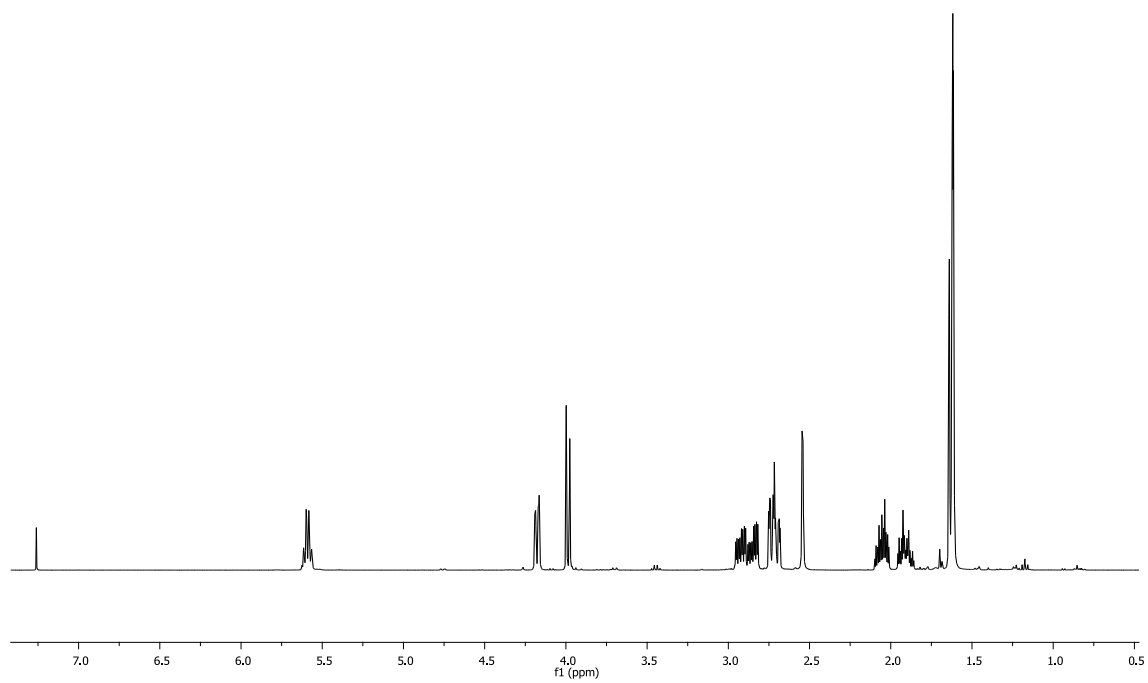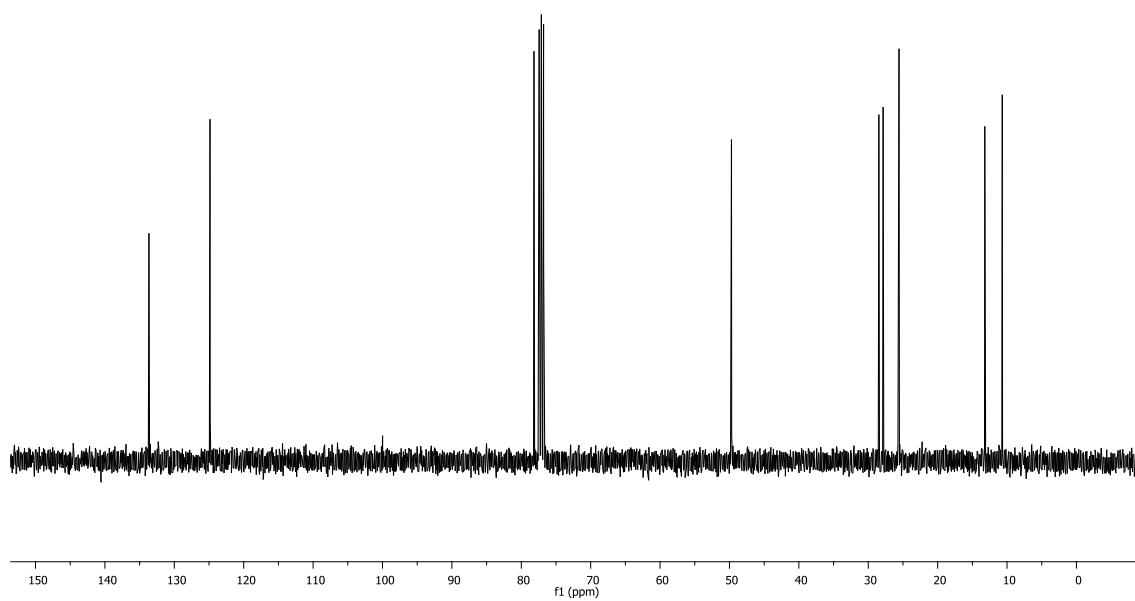

<sup>1</sup>H NMR (400 MHz) and <sup>13</sup>C NMR (100 MHz) of compound **12**

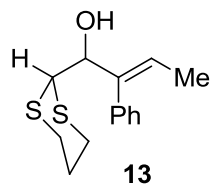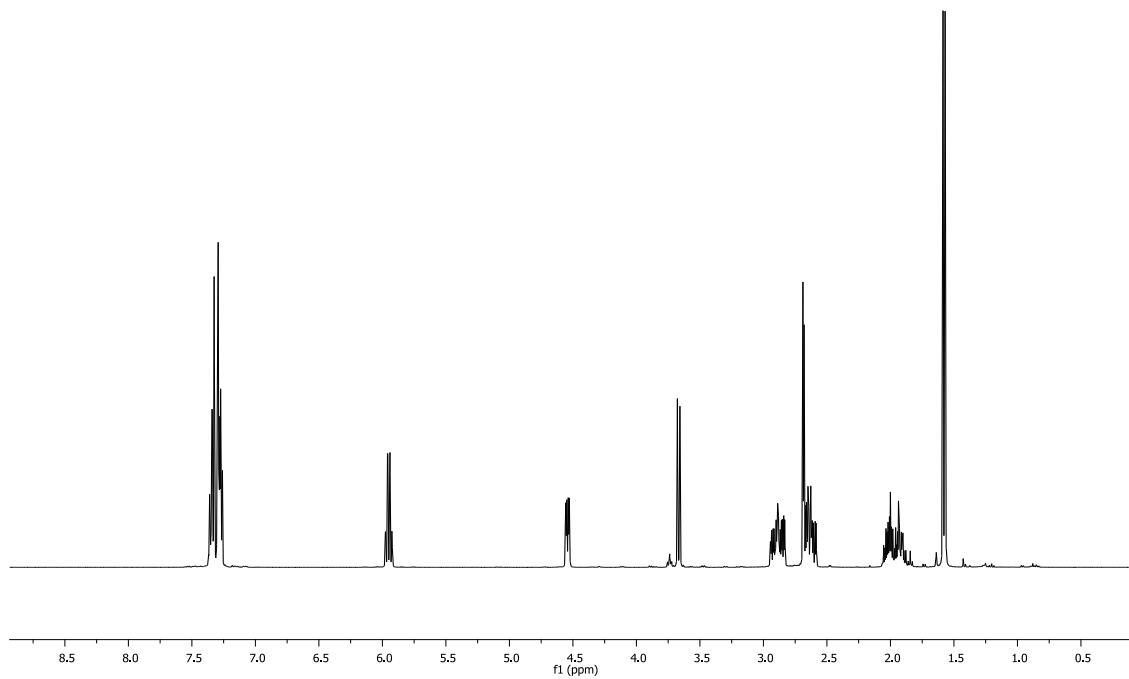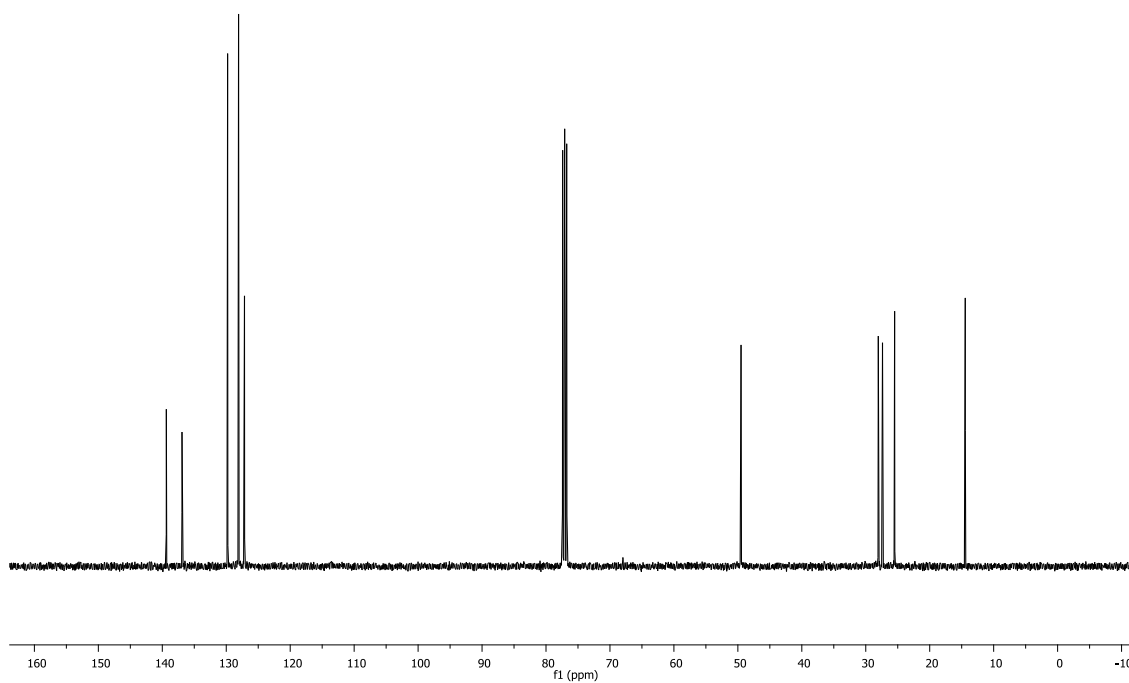

<sup>1</sup>H NMR (400 MHz) and <sup>13</sup>C NMR (100 MHz) of compound **13**

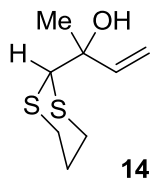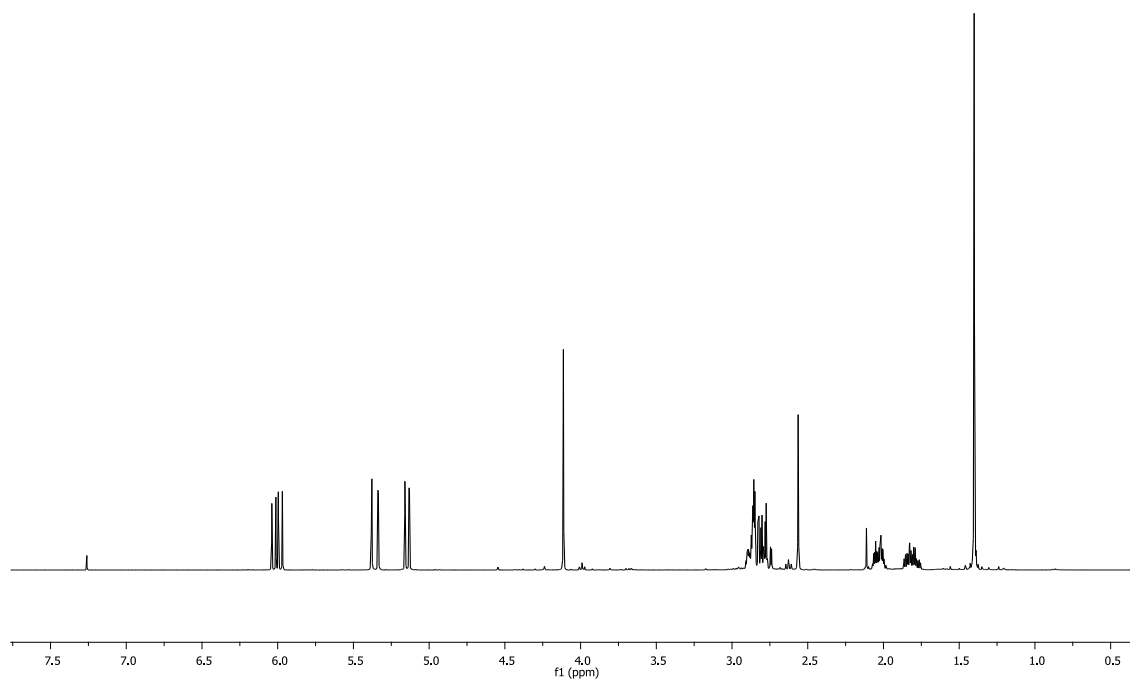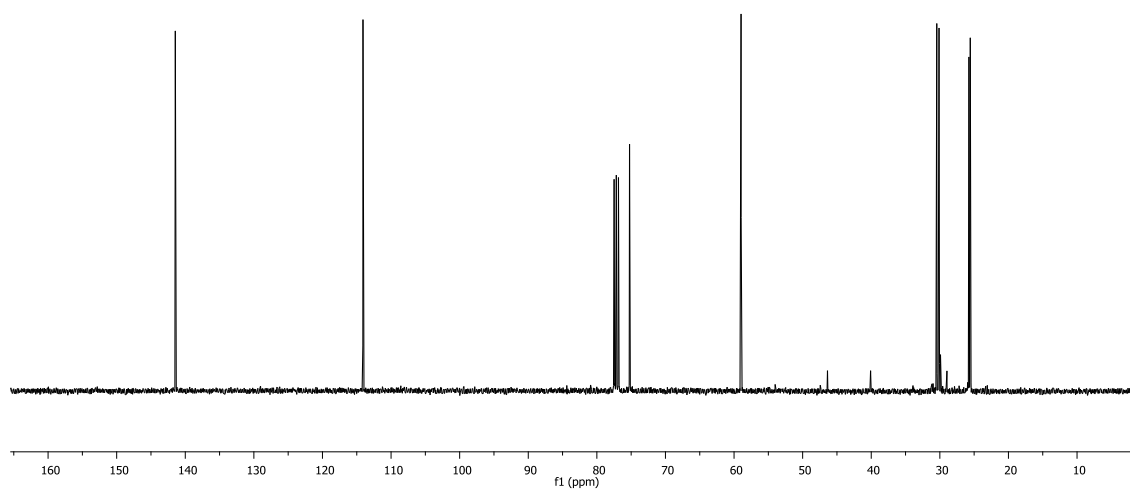

<sup>1</sup>H NMR (400 MHz) and <sup>13</sup>C NMR (100 MHz) of compound **14**

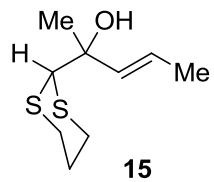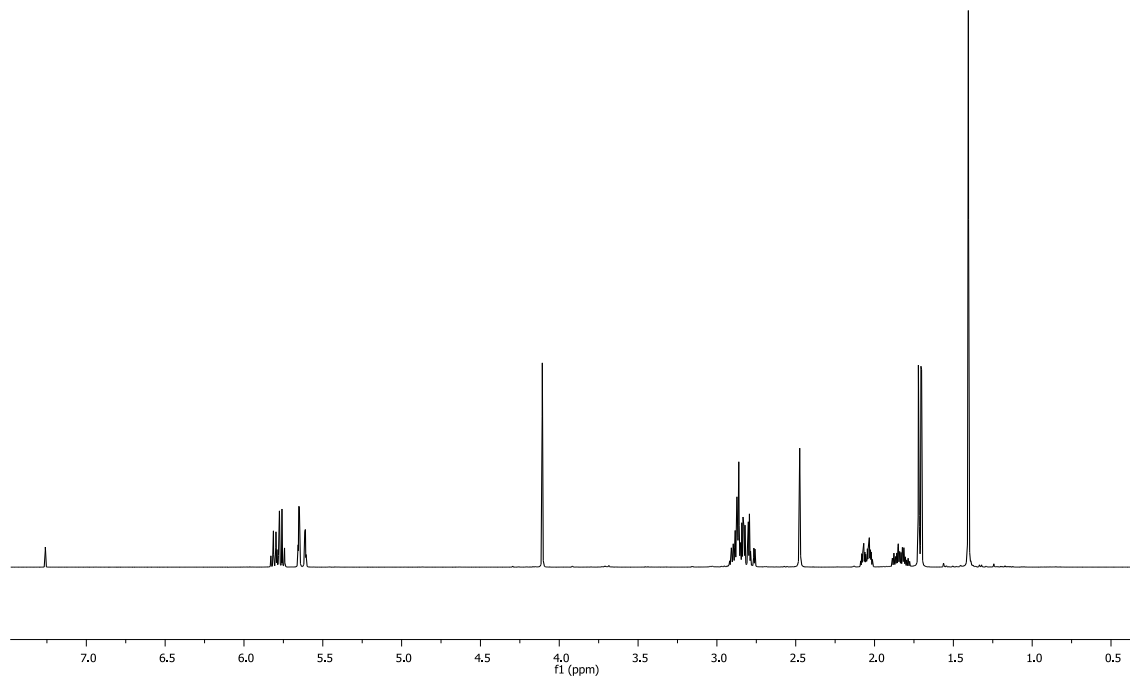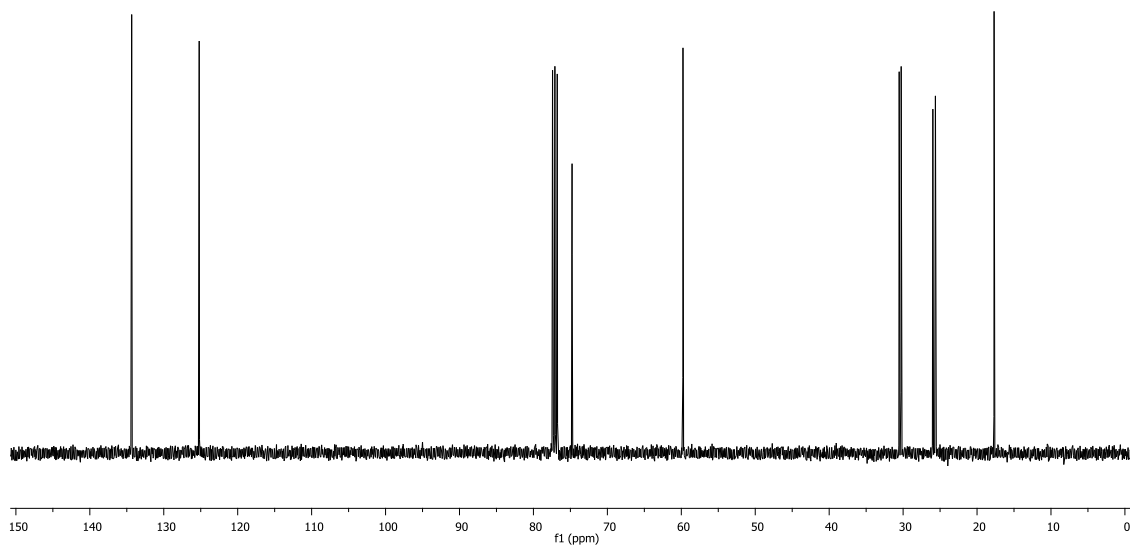

<sup>1</sup>H NMR (400 MHz) and <sup>13</sup>C NMR (100 MHz) of compound **15**



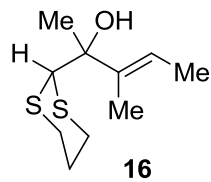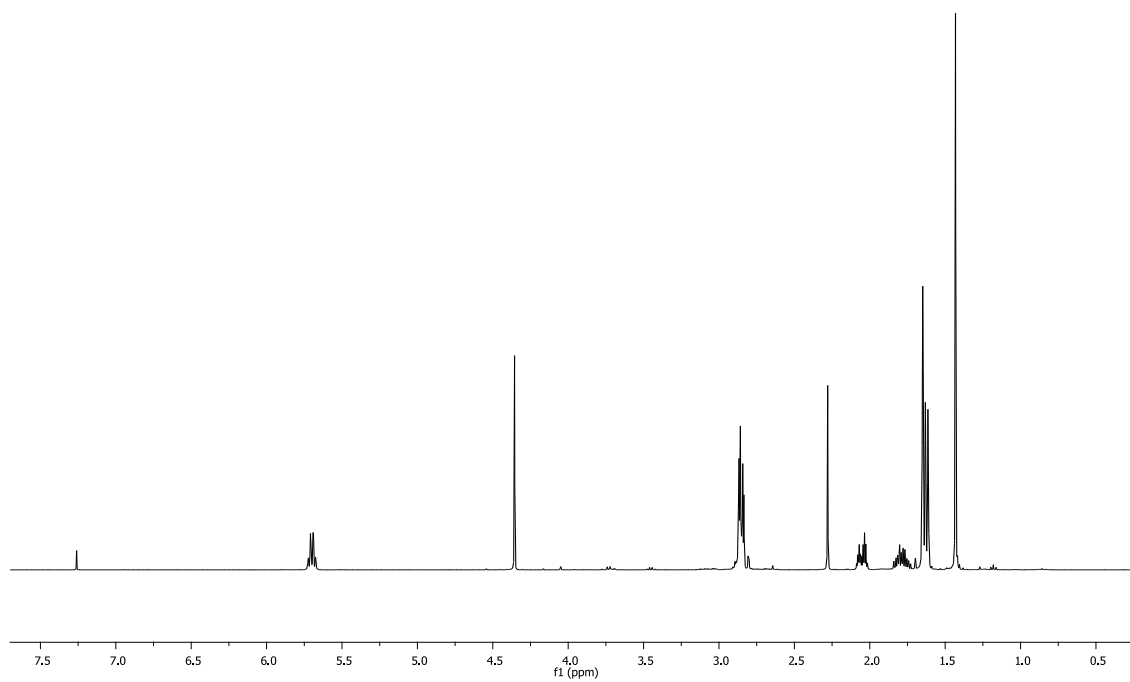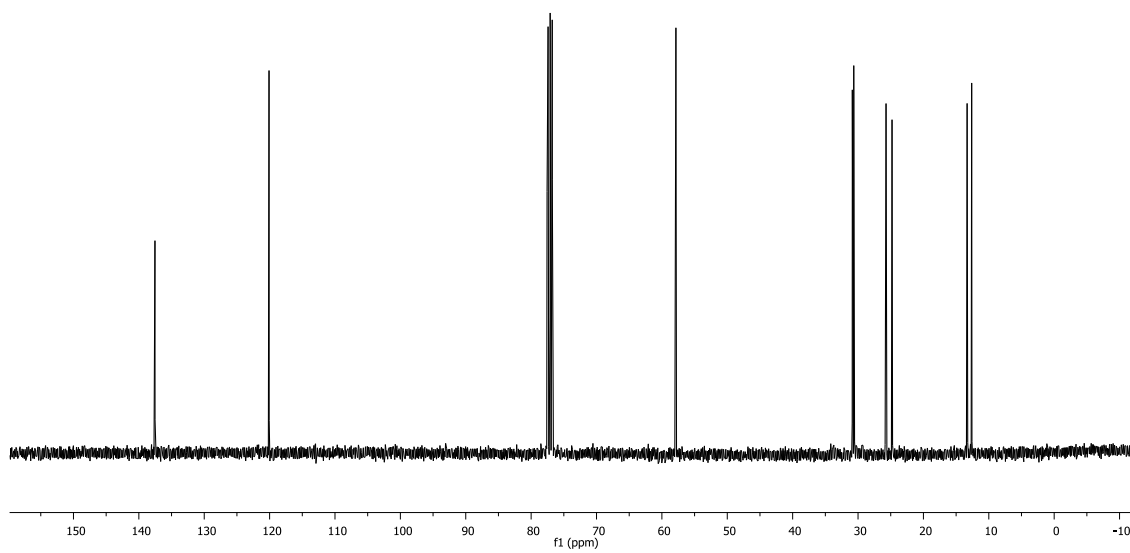

<sup>1</sup>H NMR (400 MHz) and <sup>13</sup>C NMR (100 MHz) of compound **16**

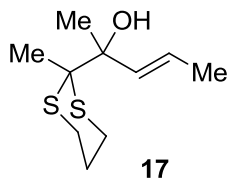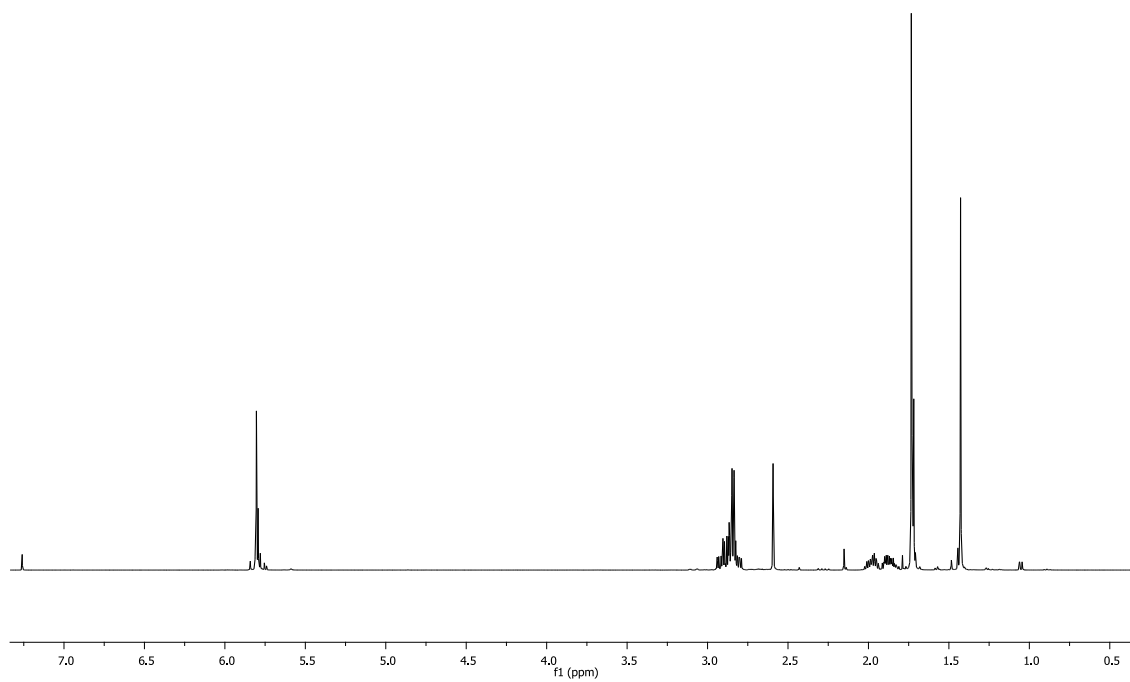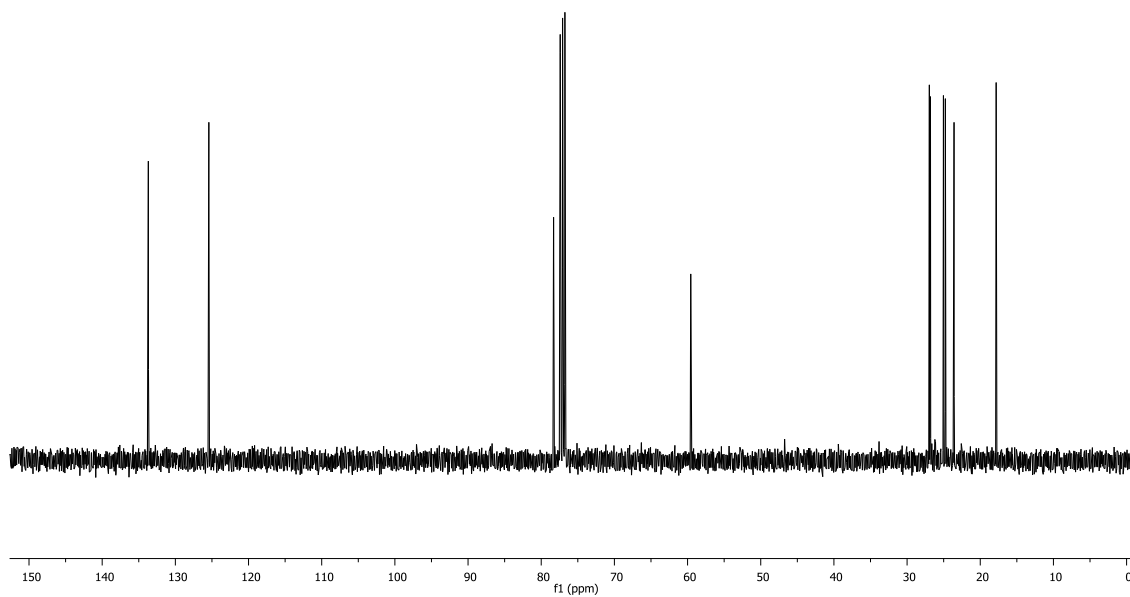

<sup>1</sup>H NMR (400 MHz) and <sup>13</sup>C NMR (100 MHz) of compound **17**

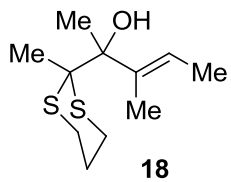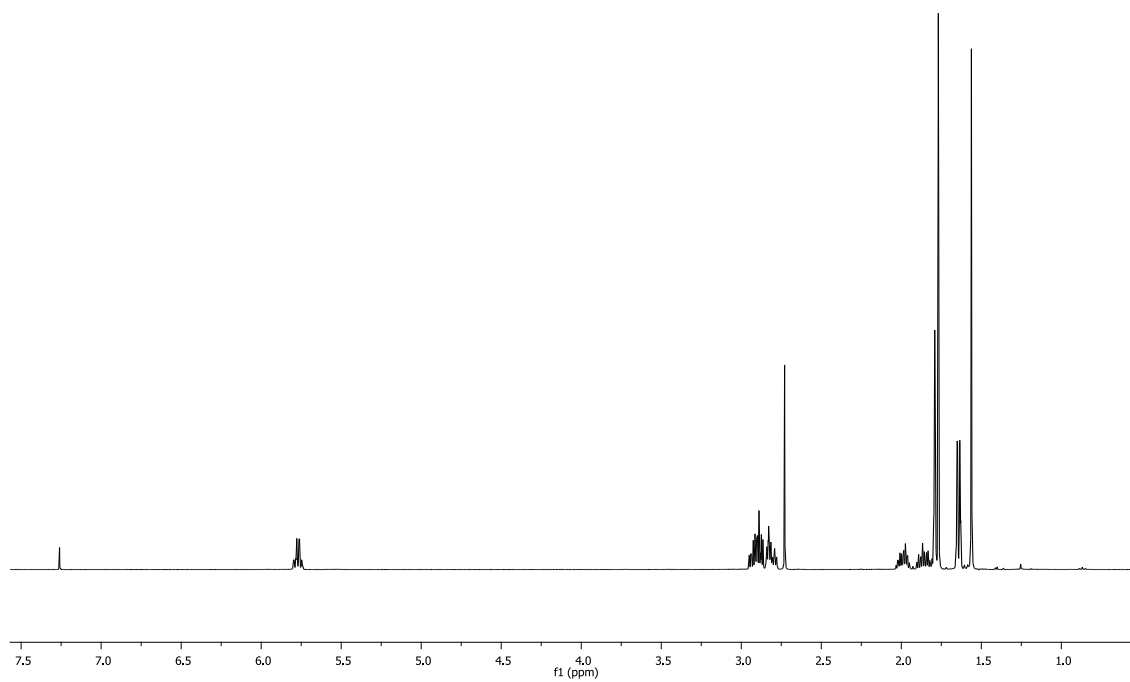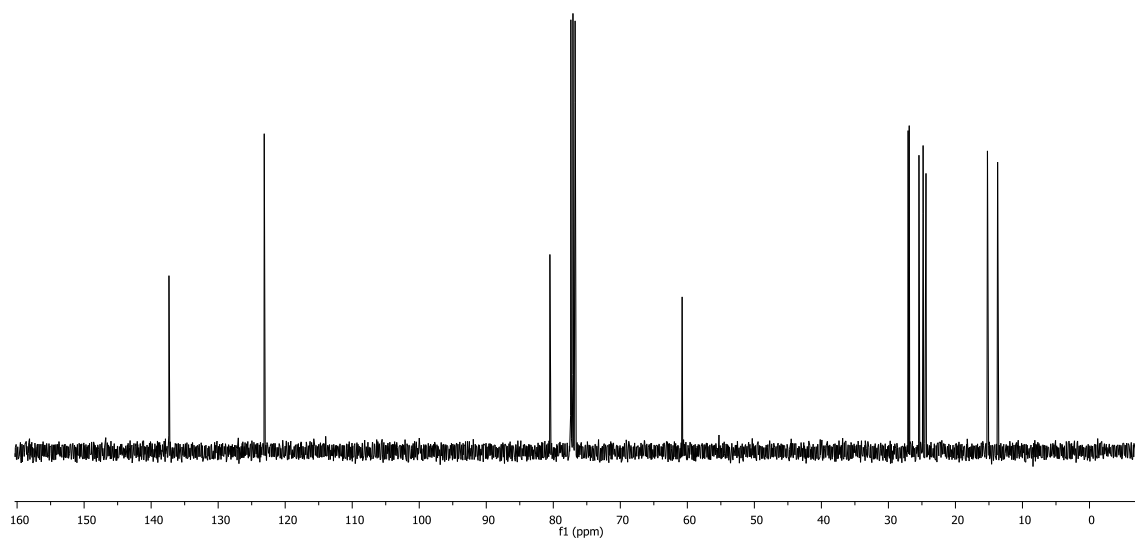

<sup>1</sup>H NMR (400 MHz) and <sup>13</sup>C NMR (100 MHz) of compound **18**

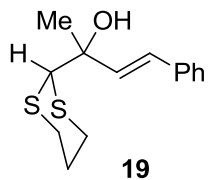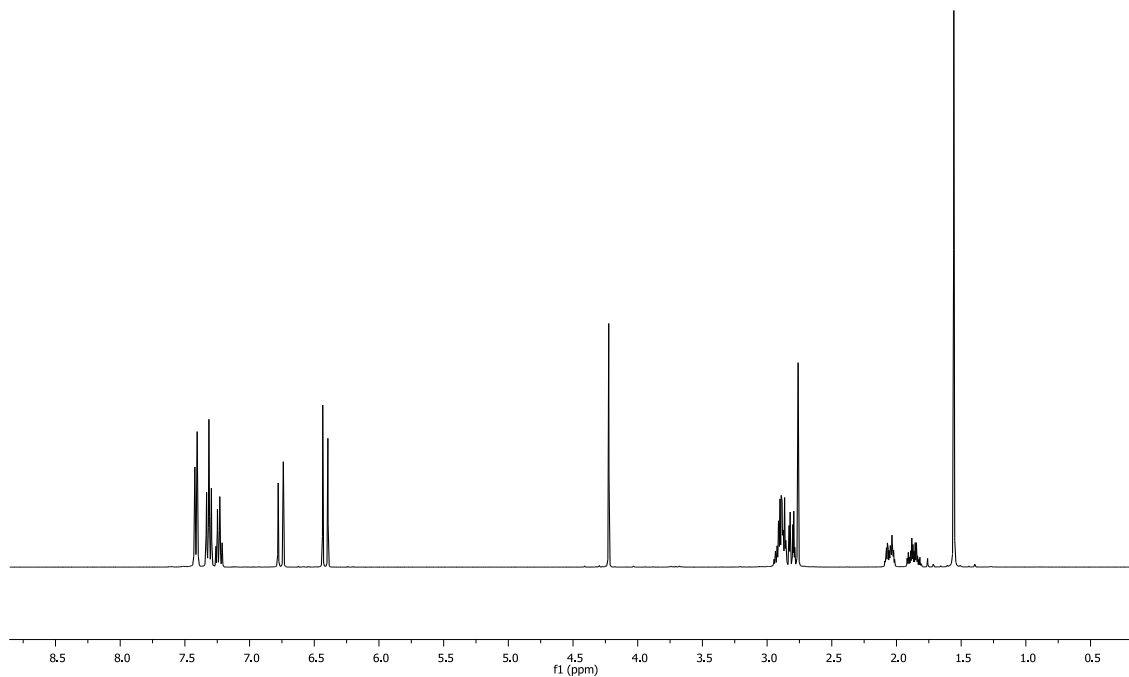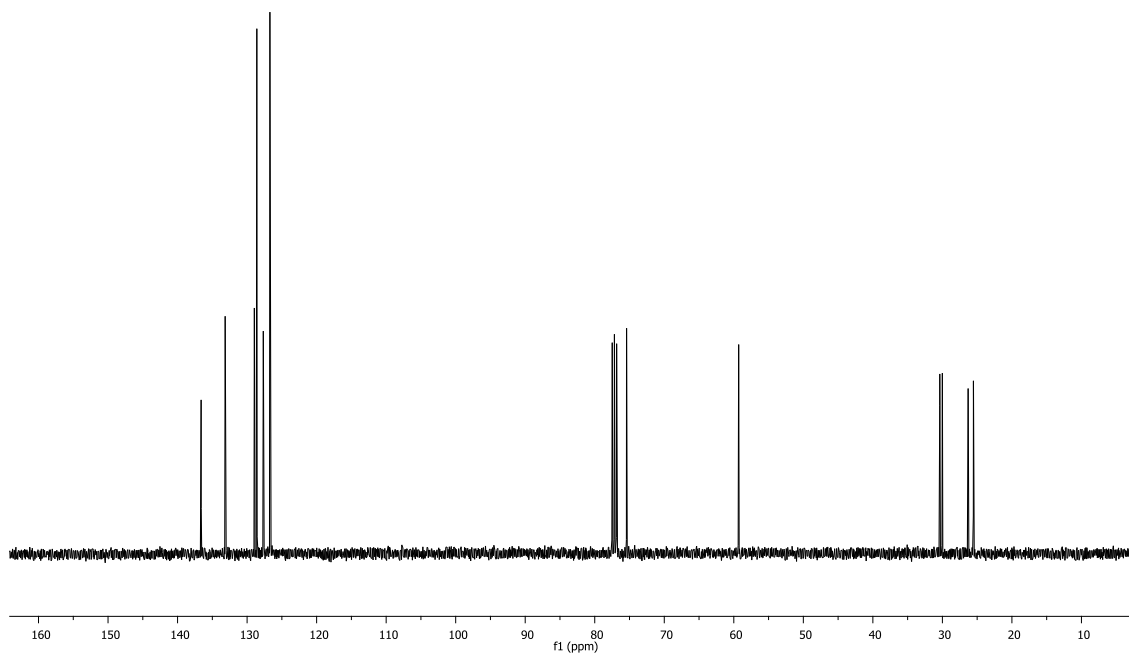

<sup>1</sup>H NMR (400 MHz) and <sup>13</sup>C NMR (100 MHz) of compound **19**

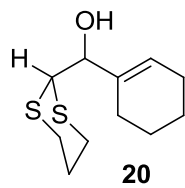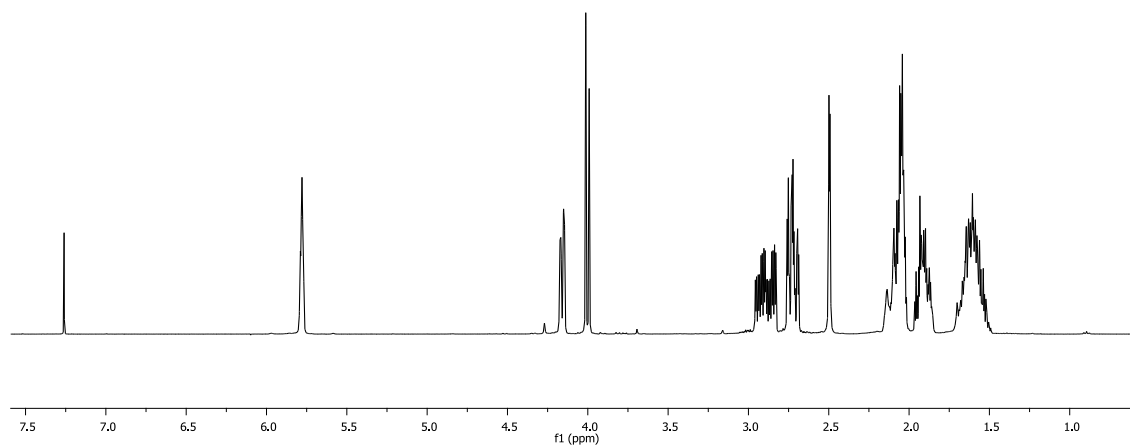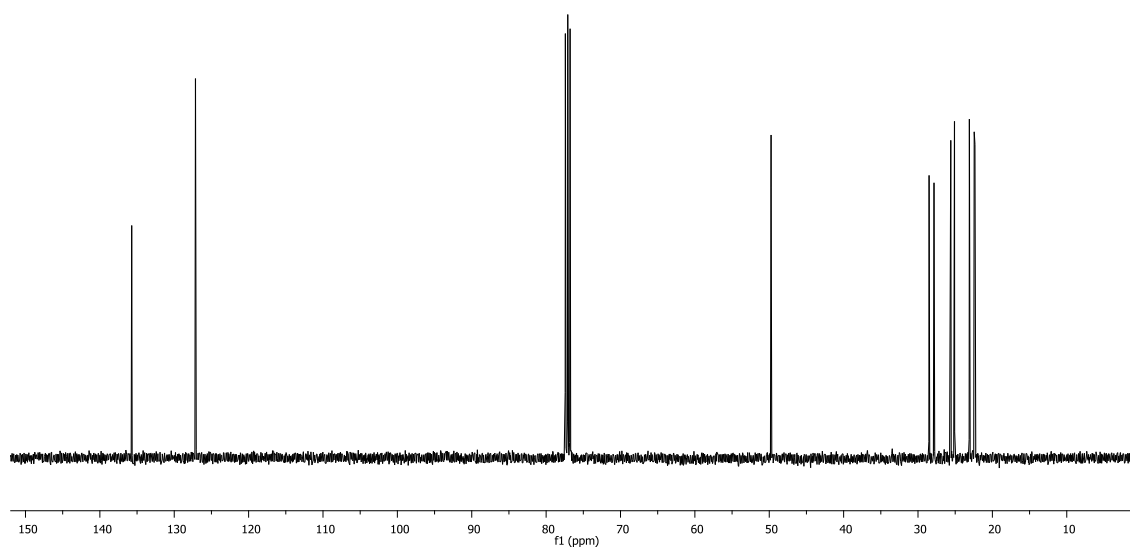

<sup>1</sup>H NMR (400 MHz) and <sup>13</sup>C NMR (100 MHz) of compound **20**

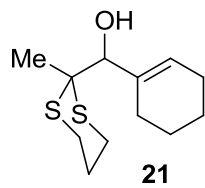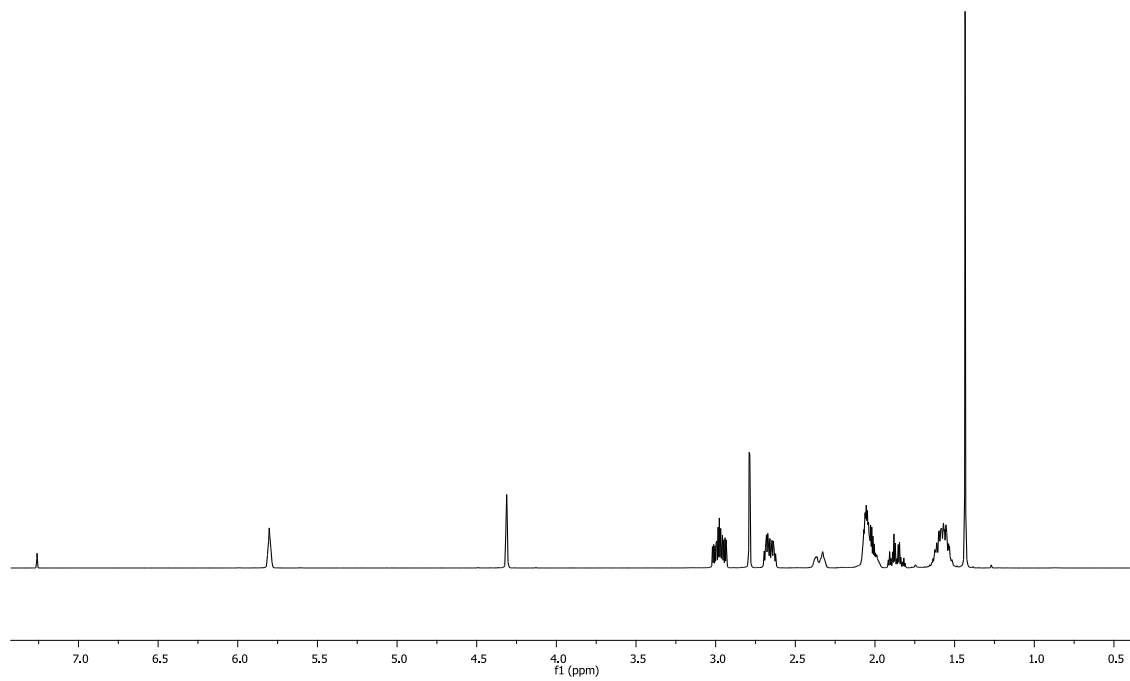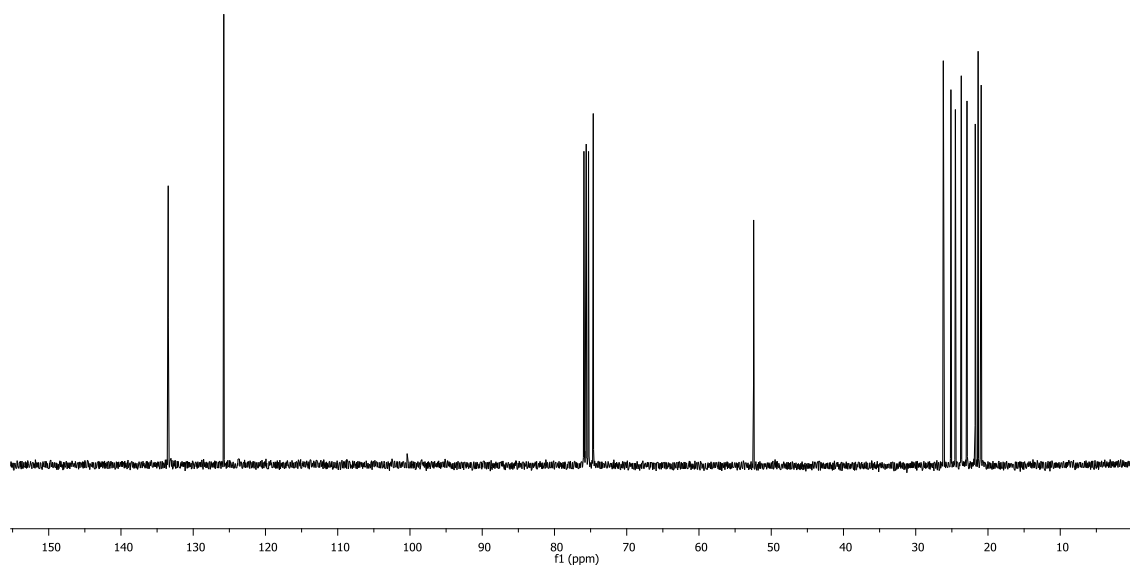

$^1\text{H}$  NMR (400 MHz) and  $^{13}\text{C}$  NMR (100 MHz) of compound **21**

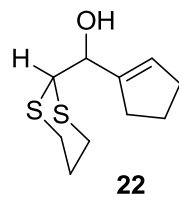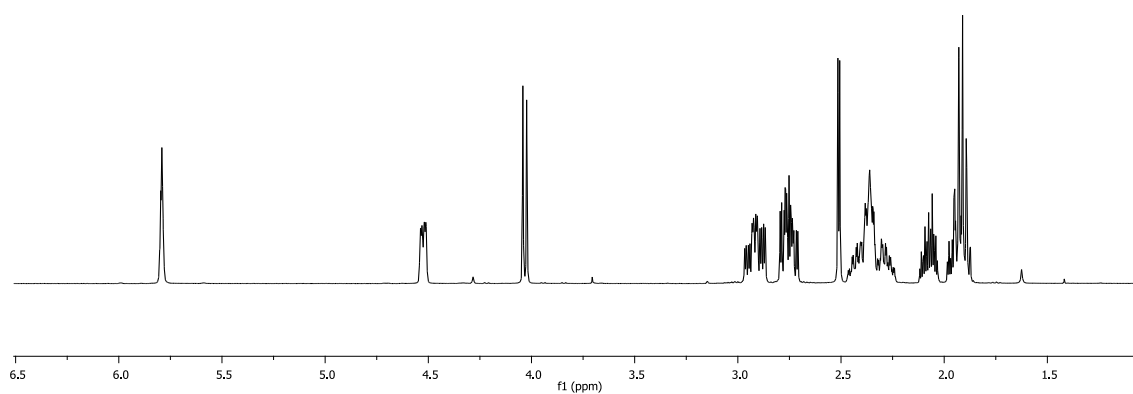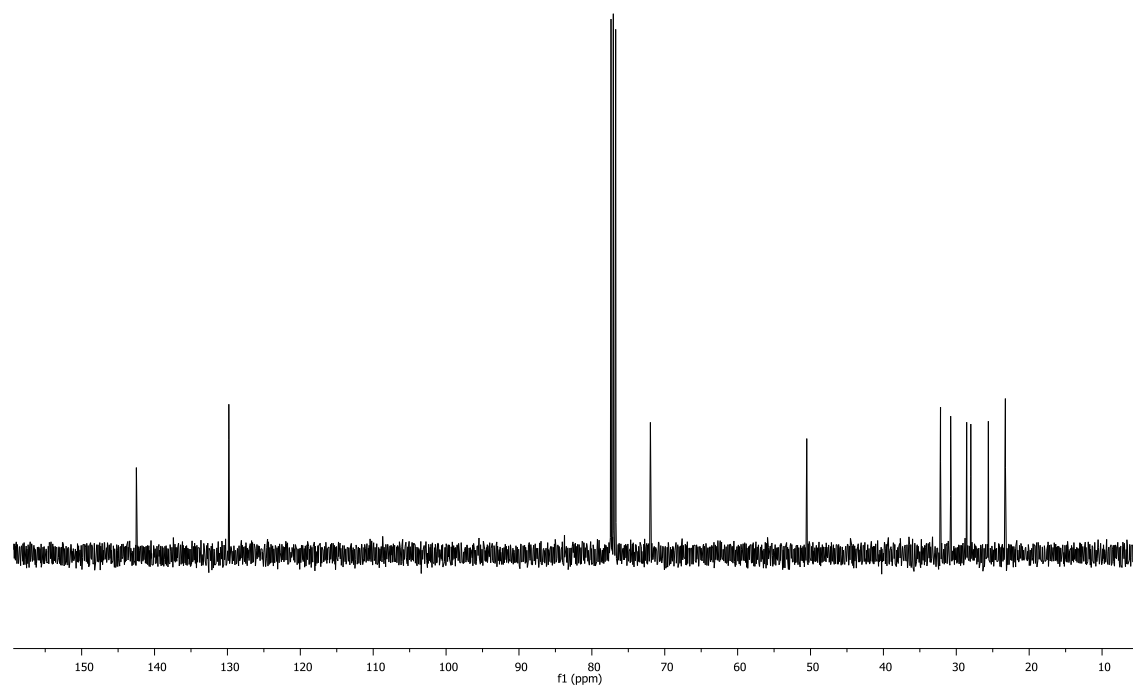

<sup>1</sup>H NMR (400 MHz) and <sup>13</sup>C NMR (100 MHz) of compound **22**

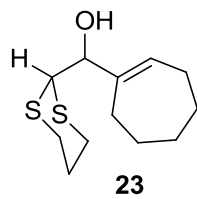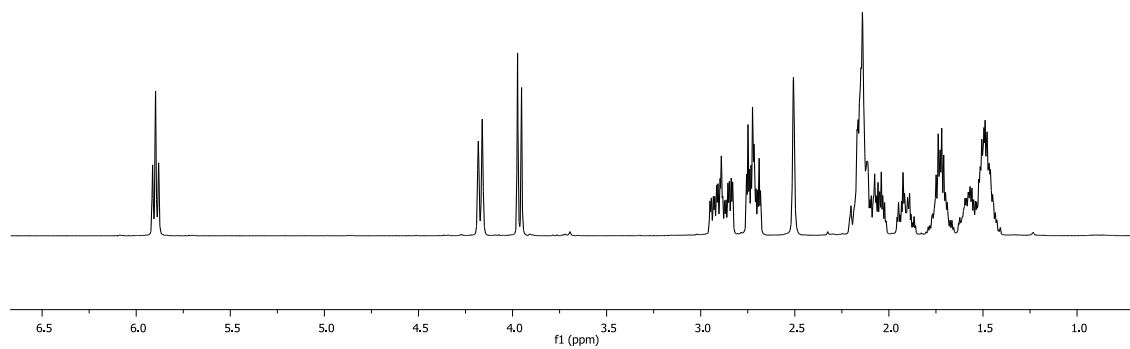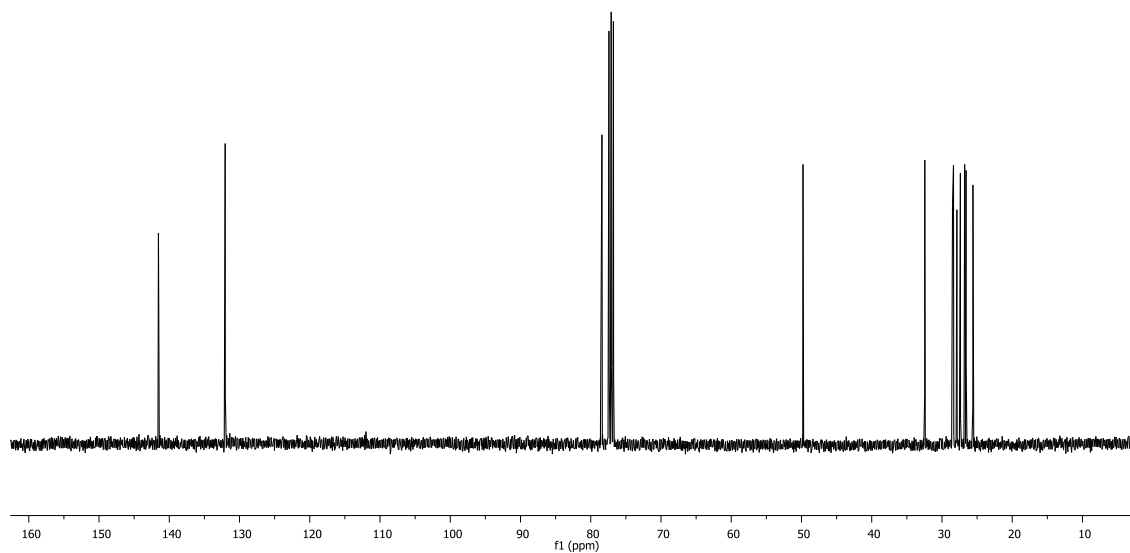

<sup>1</sup>H NMR (400 MHz) and <sup>13</sup>C NMR (100 MHz) of compound **23**



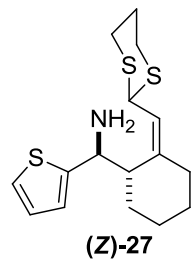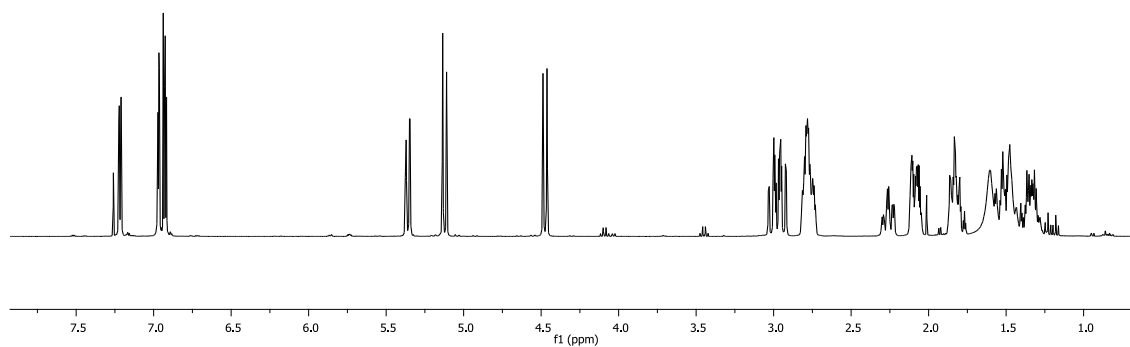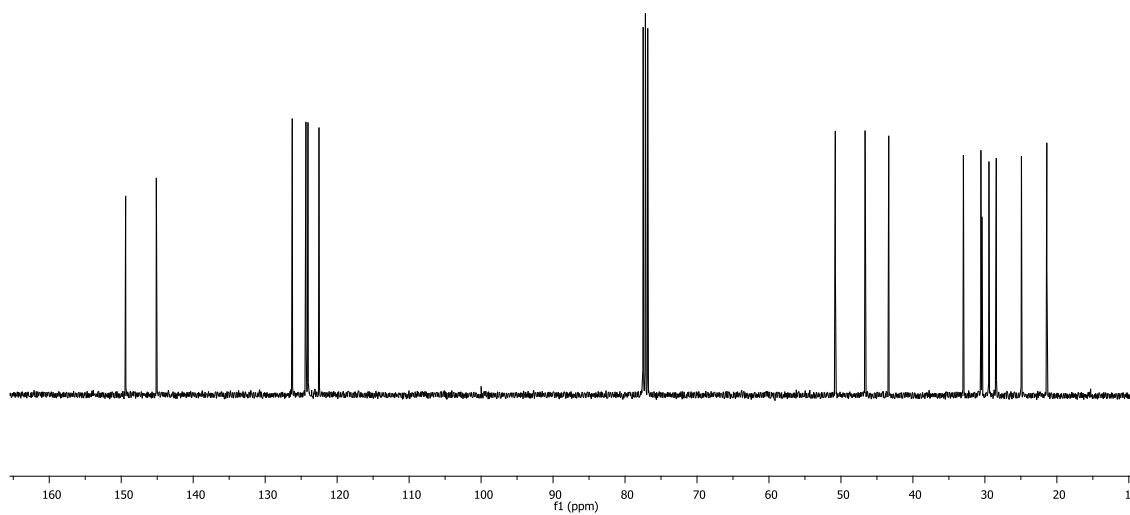

<sup>1</sup>H NMR (400 MHz) and <sup>13</sup>C NMR (100 MHz) of compound (Z)-27

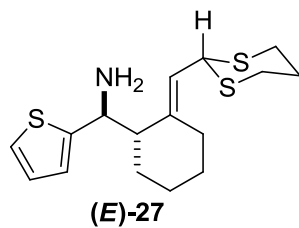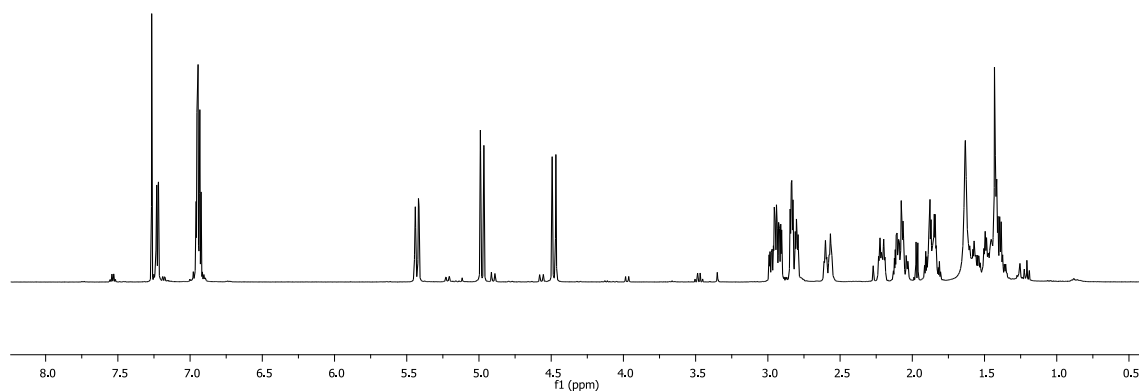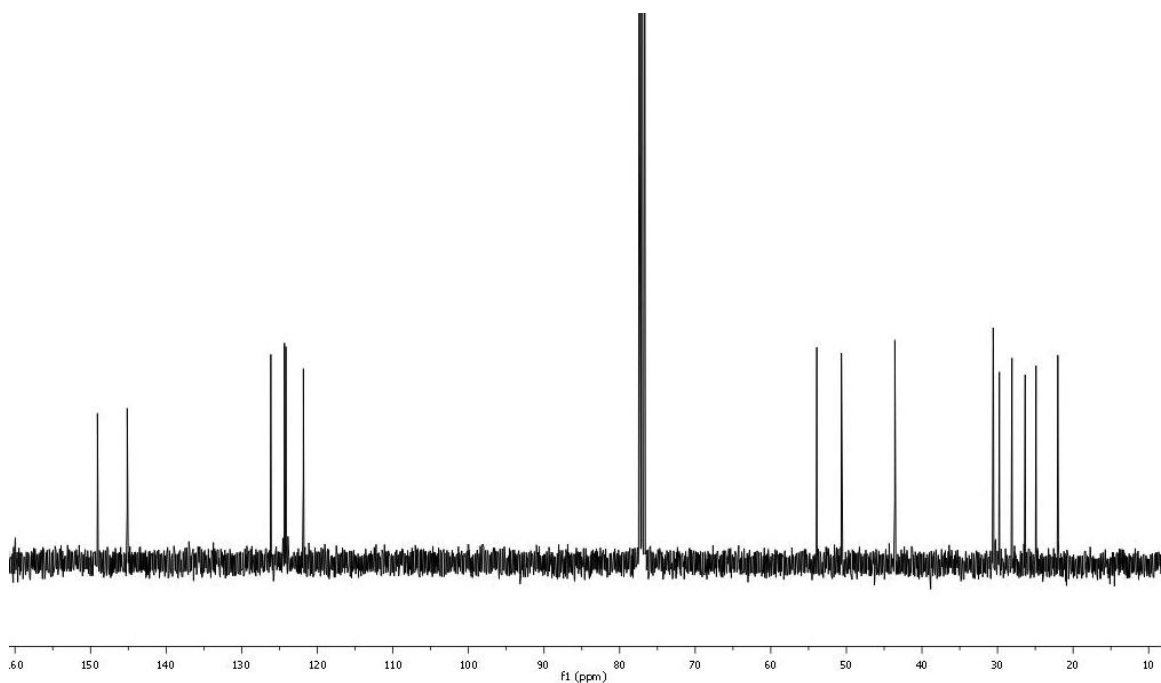

<sup>1</sup>H NMR (400 MHz) and <sup>13</sup>C NMR (100 MHz) of compound (E)-27

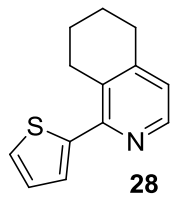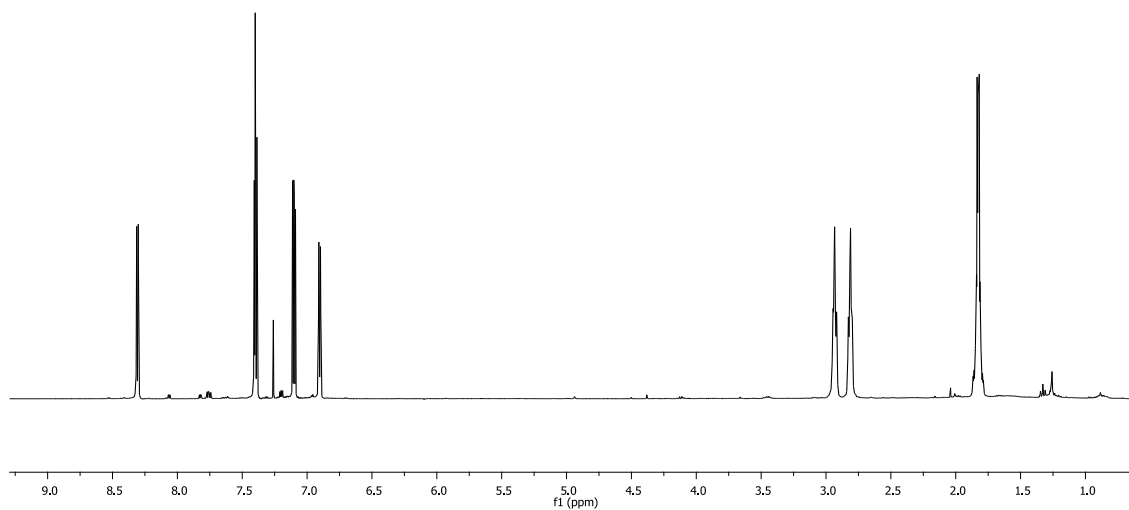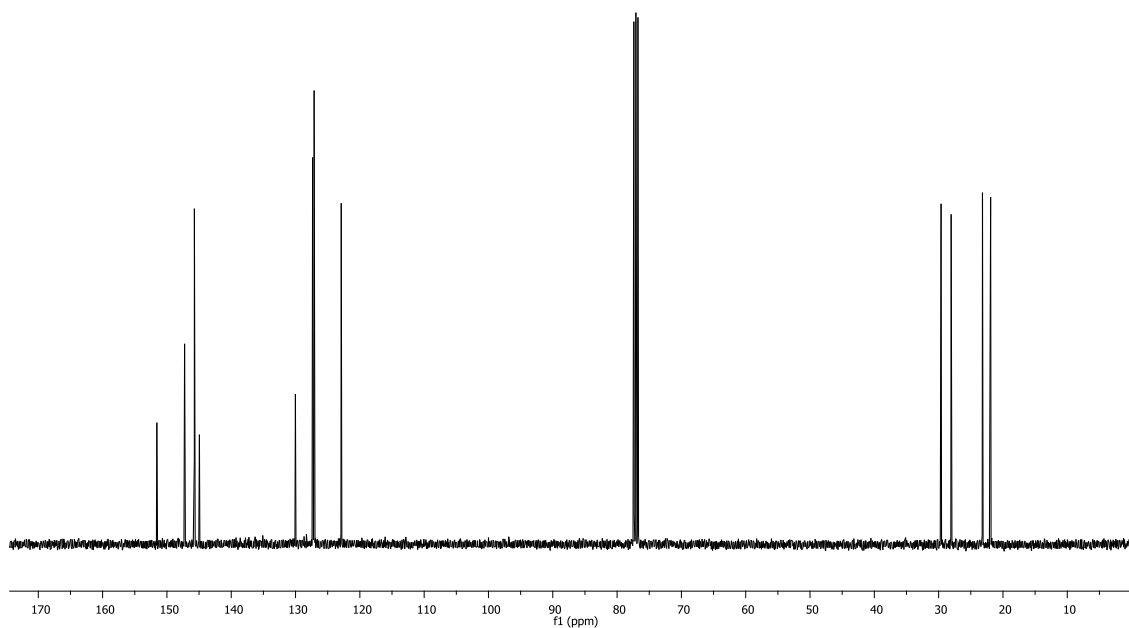

$^1\text{H}$  NMR (400 MHz) and  $^{13}\text{C}$  NMR (100 MHz) of compound **28**

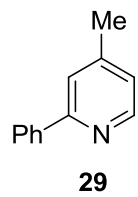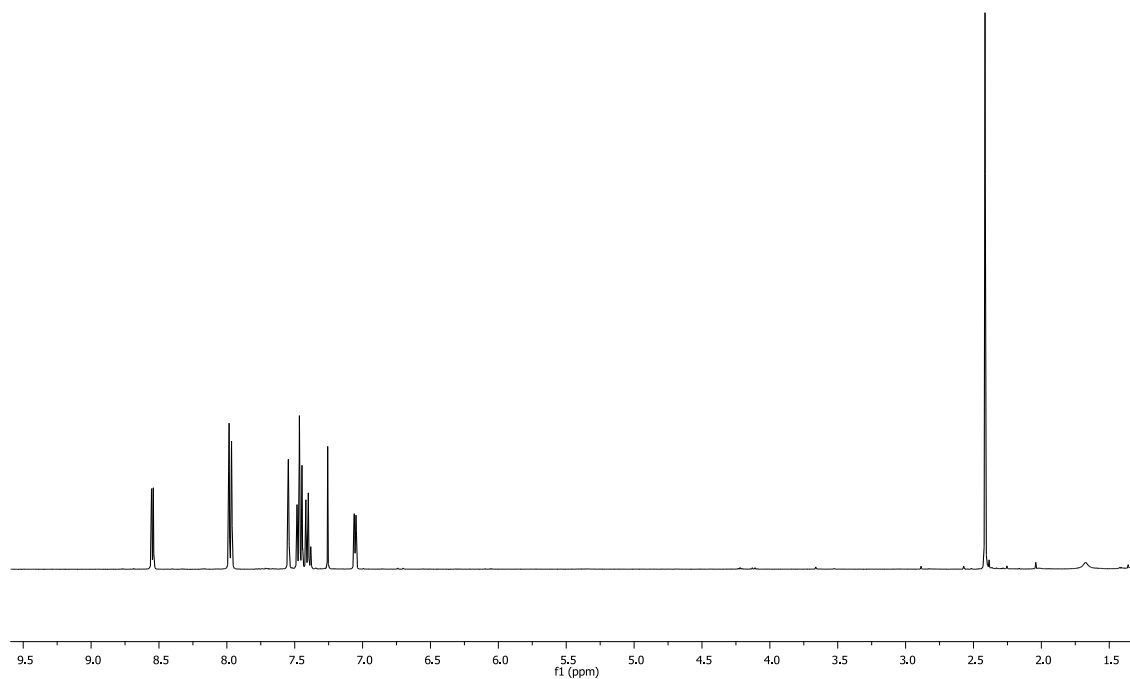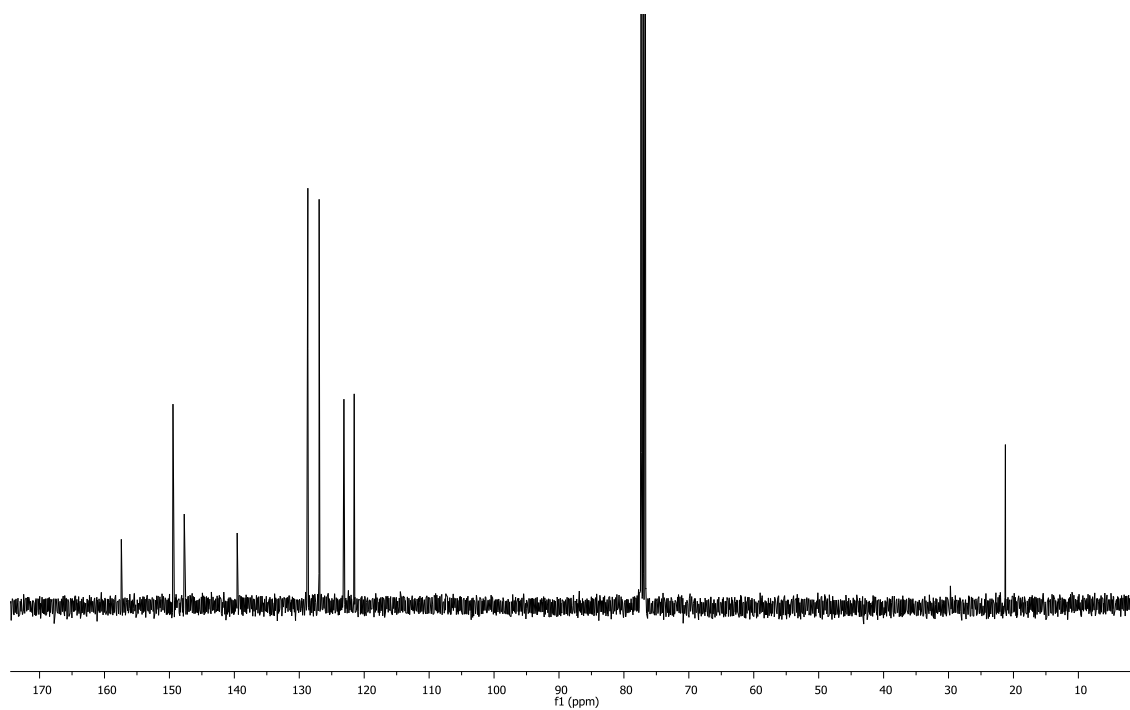

<sup>1</sup>H NMR (400 MHz) and <sup>13</sup>C NMR (100 MHz) of compound **29**

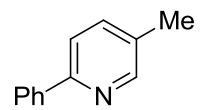

**30**

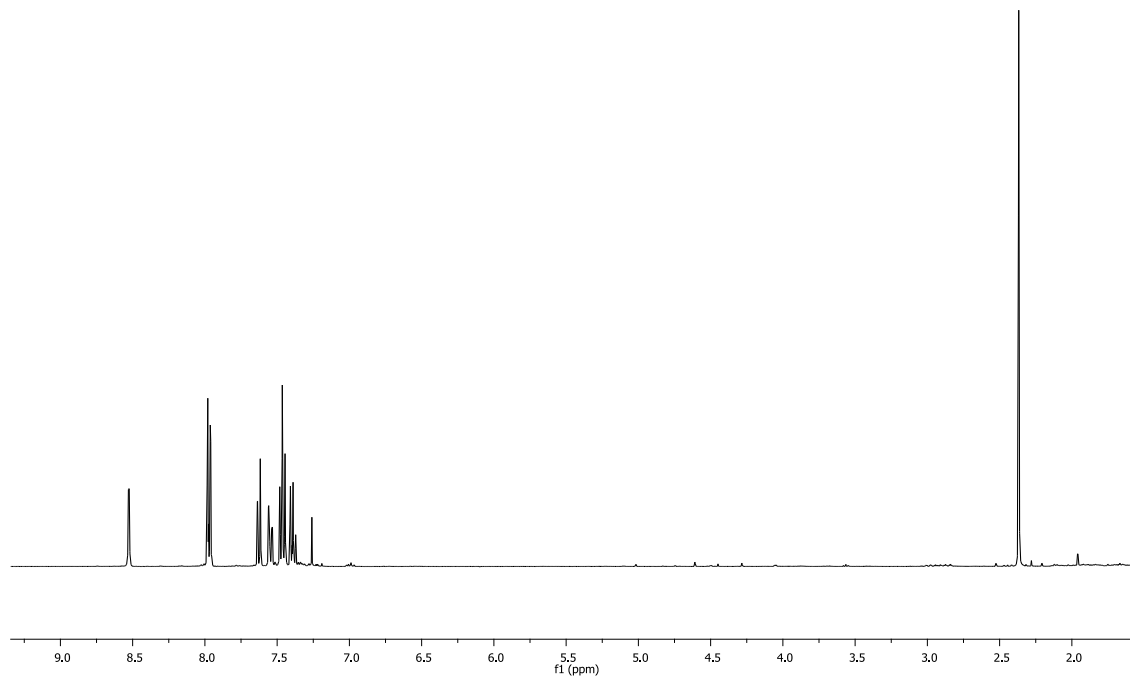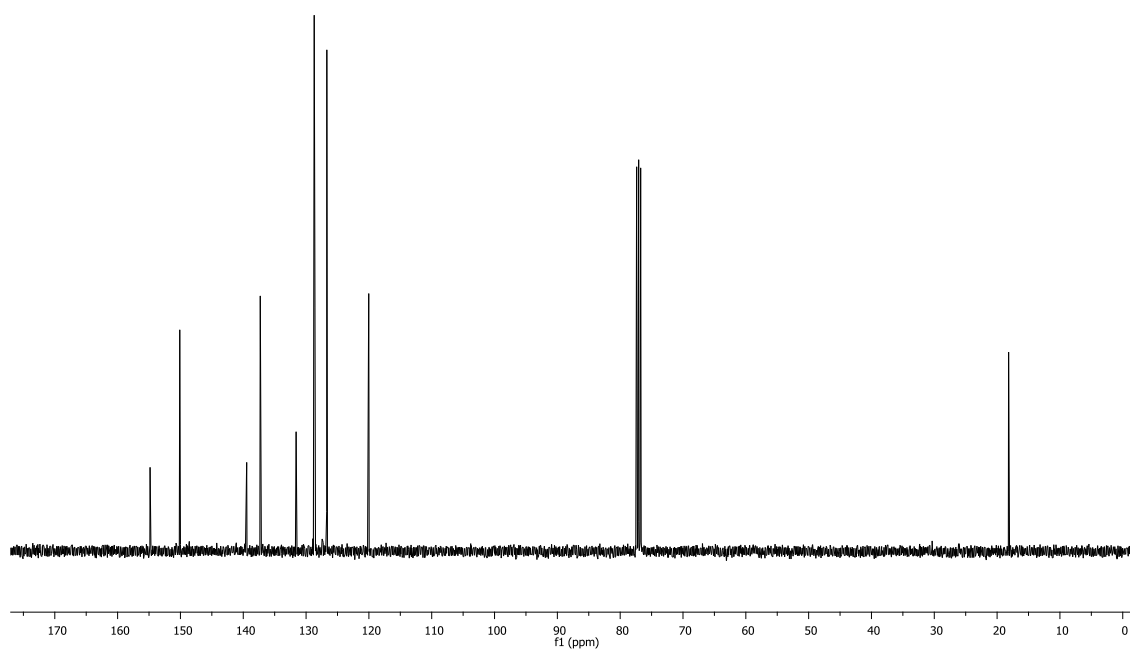

$^1\text{H}$  NMR (400 MHz) and  $^{13}\text{C}$  NMR (100 MHz) of compound **30**

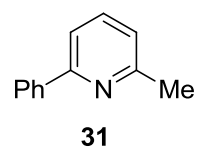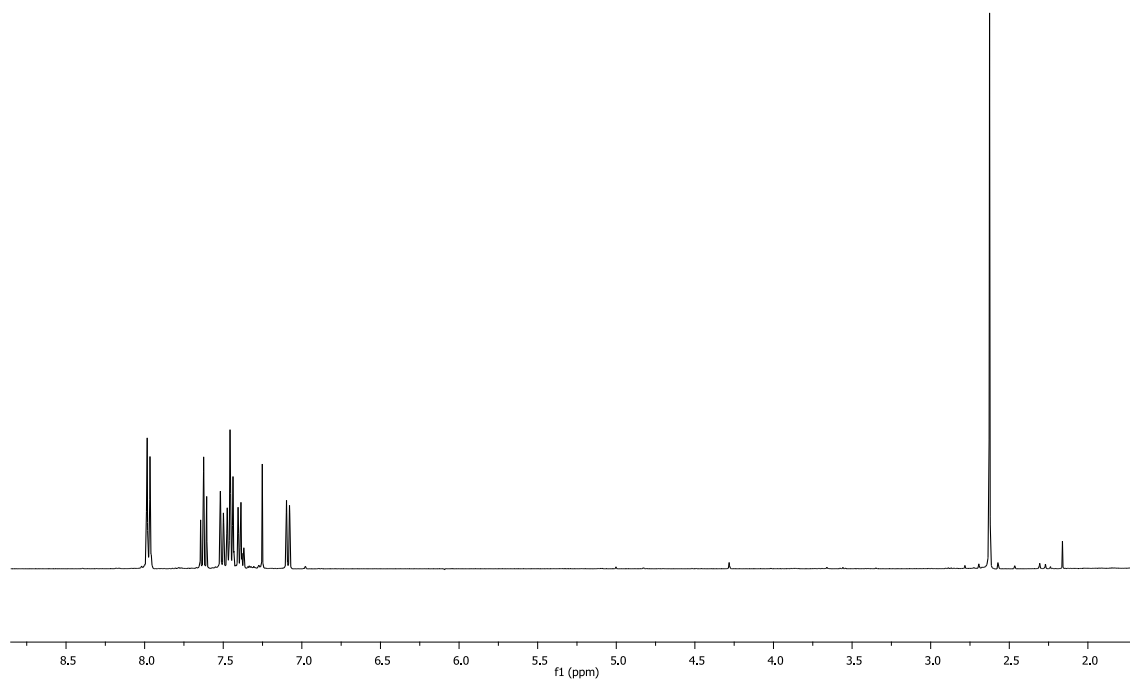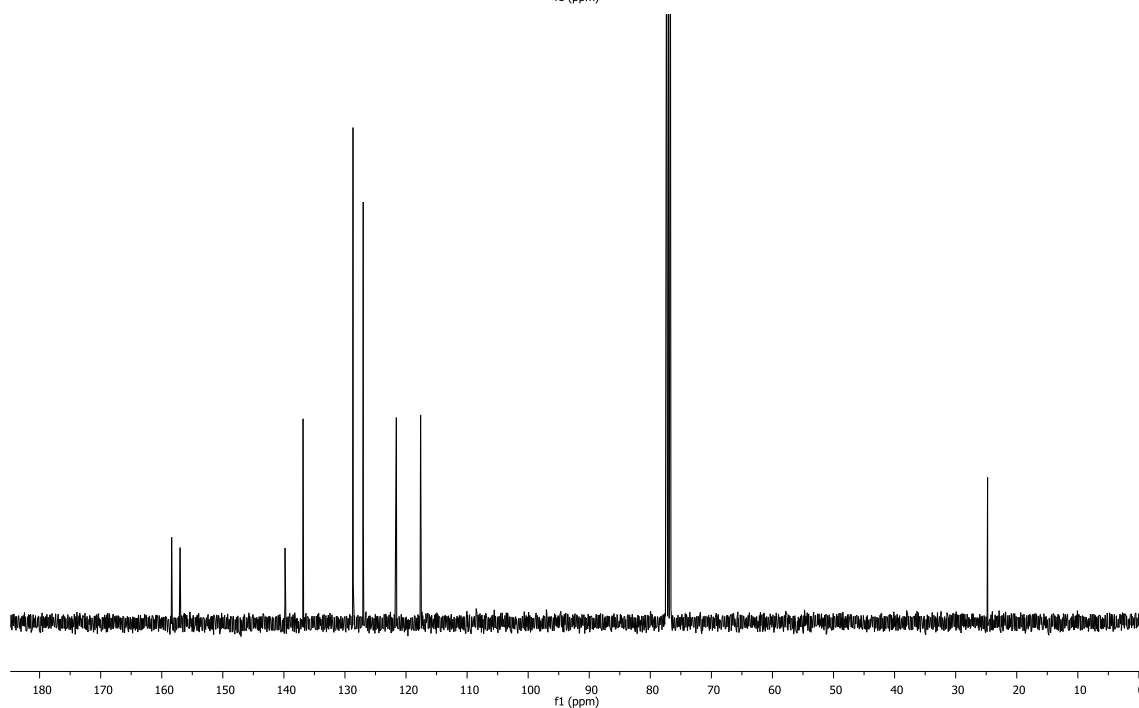

<sup>1</sup>H NMR (400 MHz) and <sup>13</sup>C NMR (100 MHz) of compound **31**

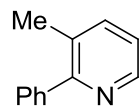

**32**

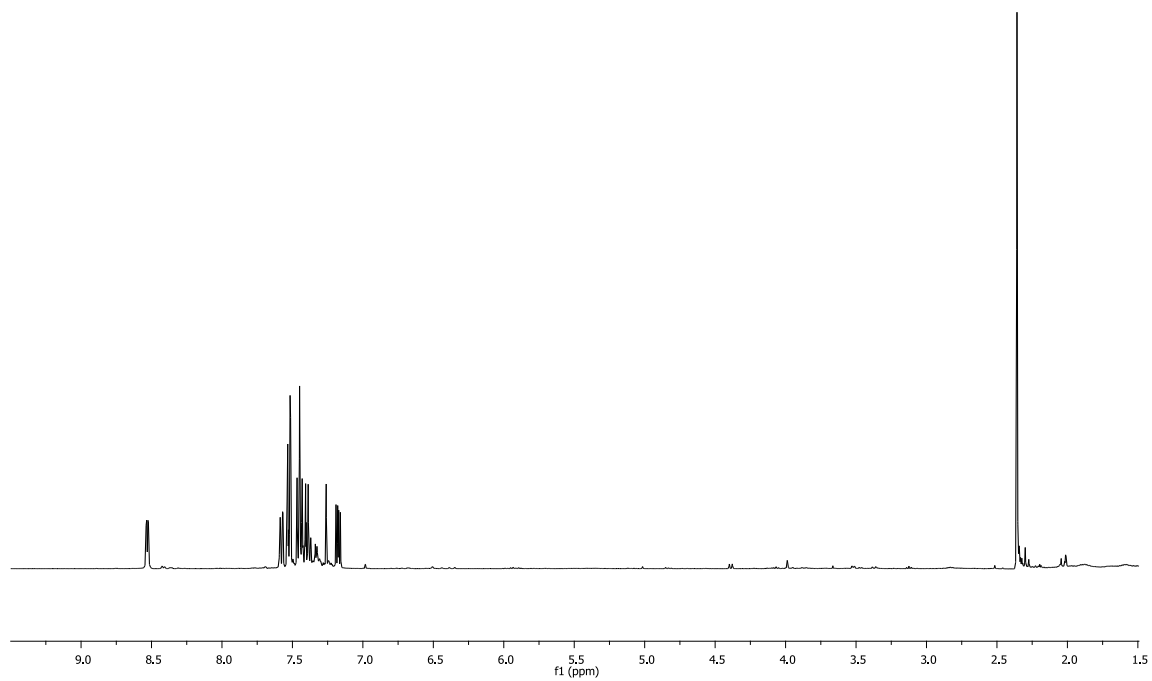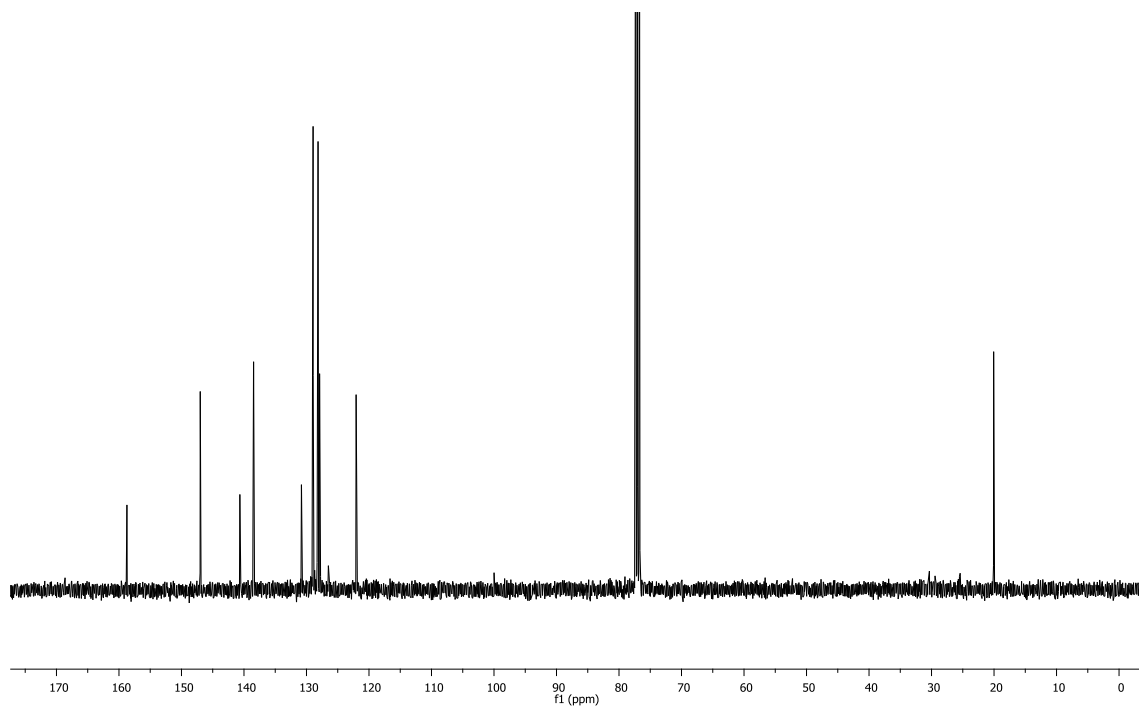

$^1\text{H}$  NMR (400 MHz) and  $^{13}\text{C}$  NMR (100 MHz) of compound **32**

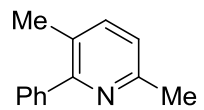

**33**

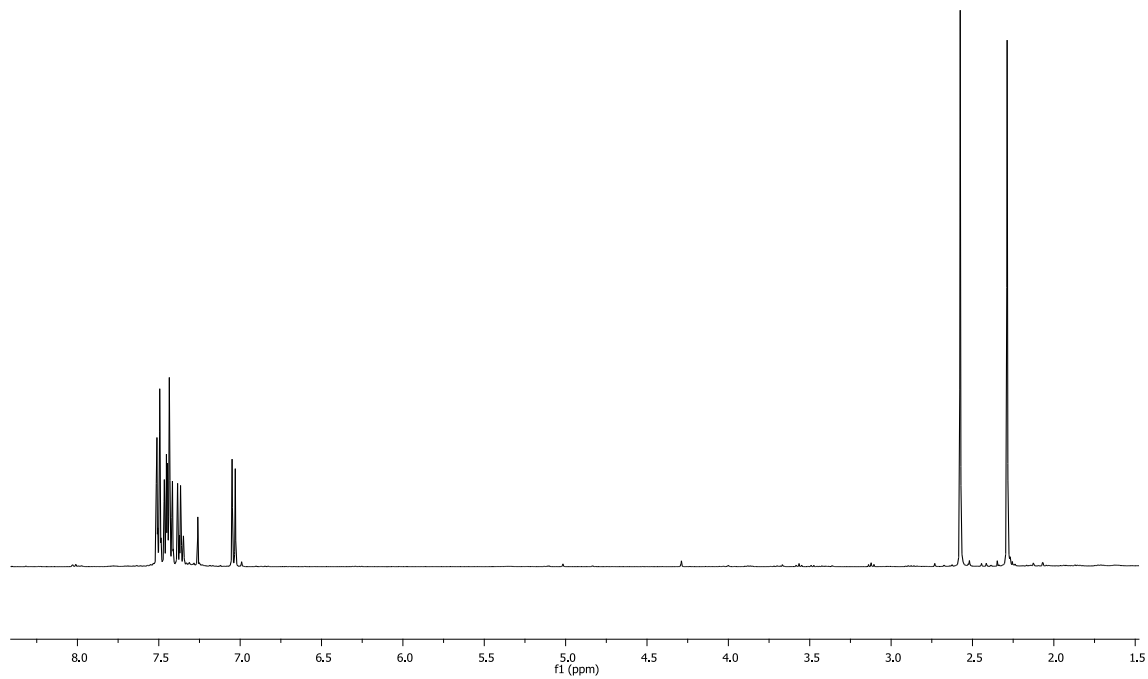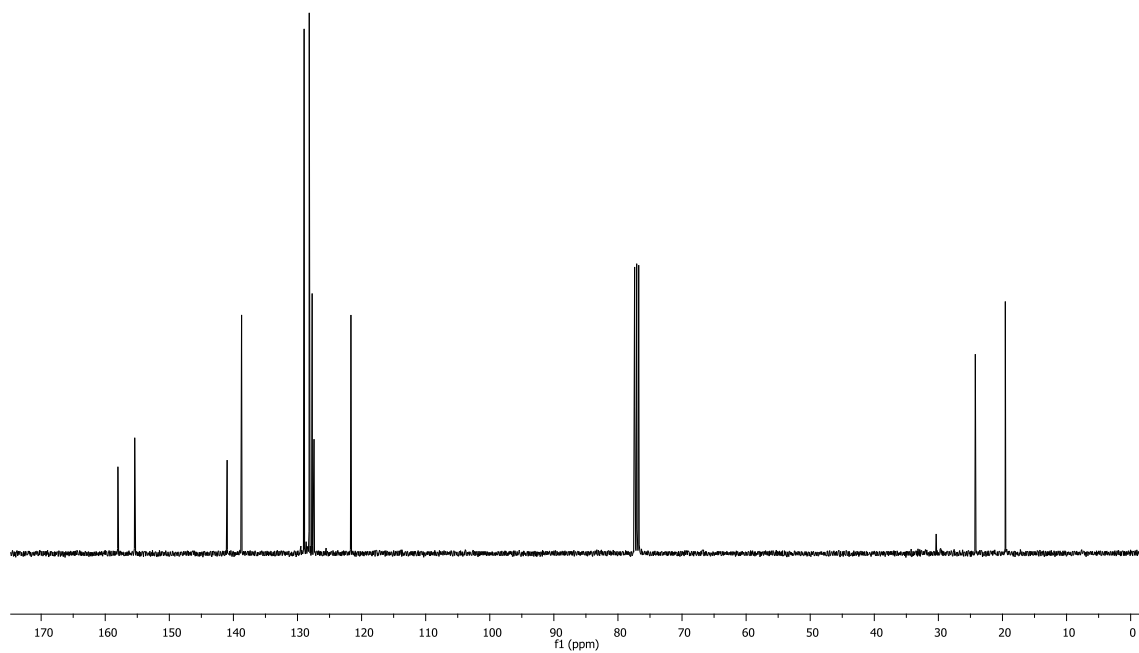

<sup>1</sup>H NMR (400 MHz) and <sup>13</sup>C NMR (100 MHz) of compound **33**



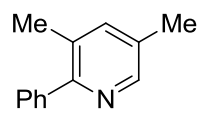

**34**

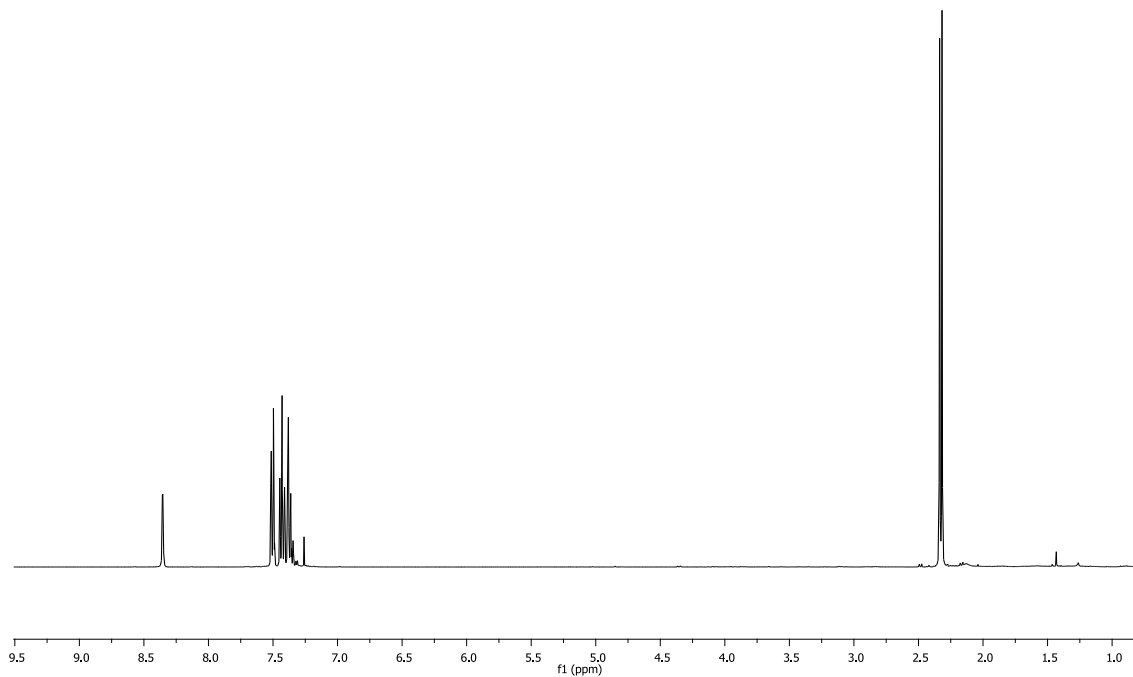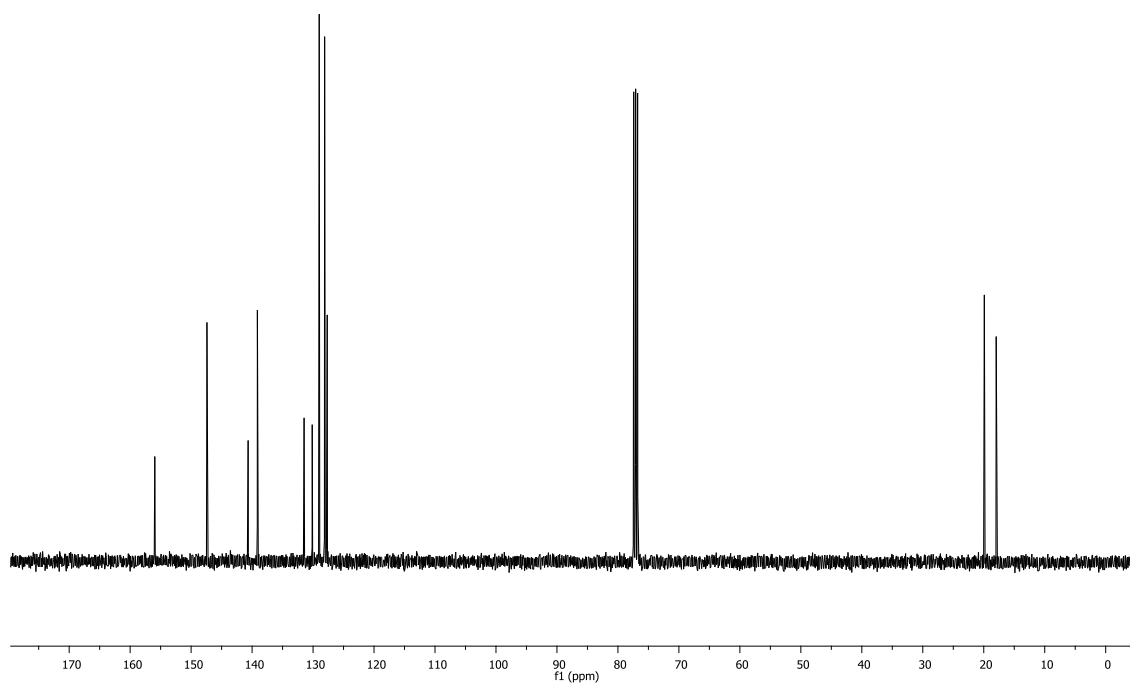

<sup>1</sup>H NMR (400 MHz) and <sup>13</sup>C NMR (100 MHz) of compound **34**

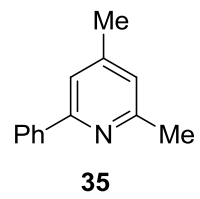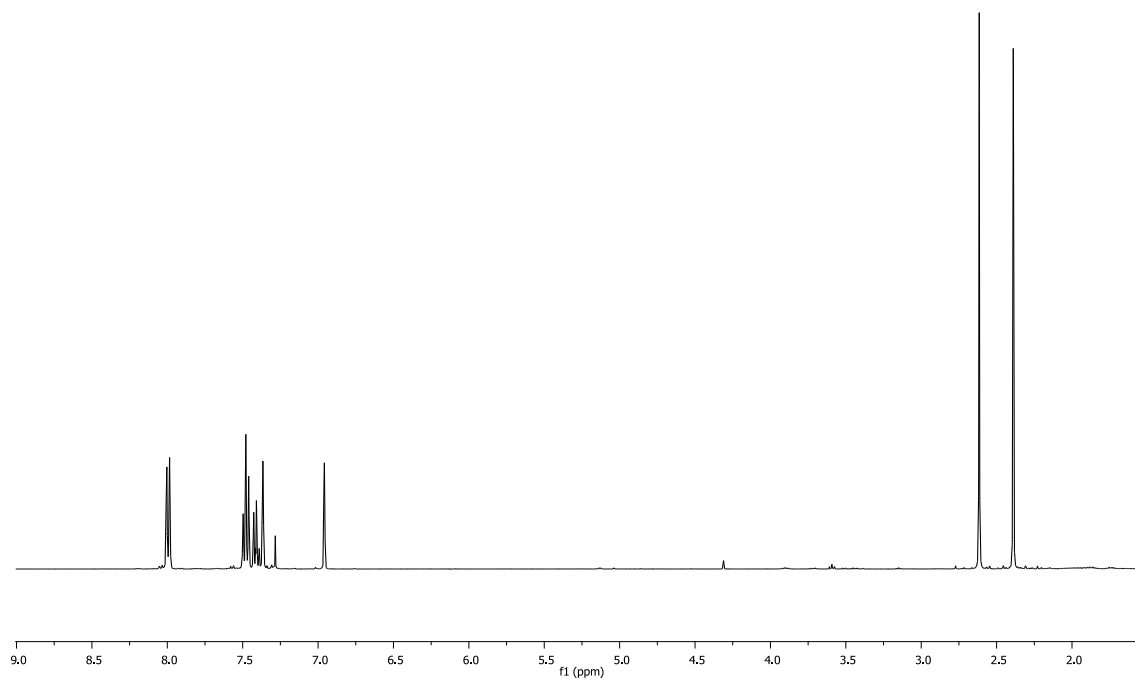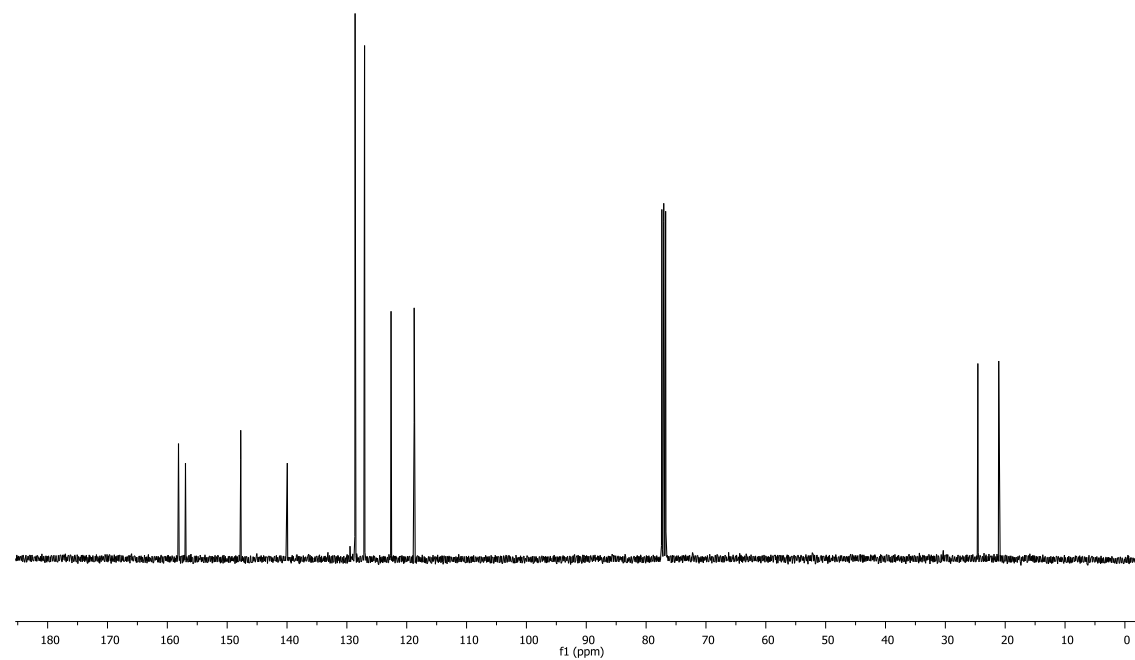

<sup>1</sup>H NMR (400 MHz) and <sup>13</sup>C NMR (100 MHz) of compound **35**

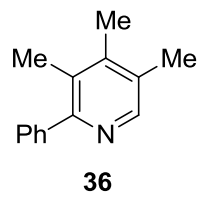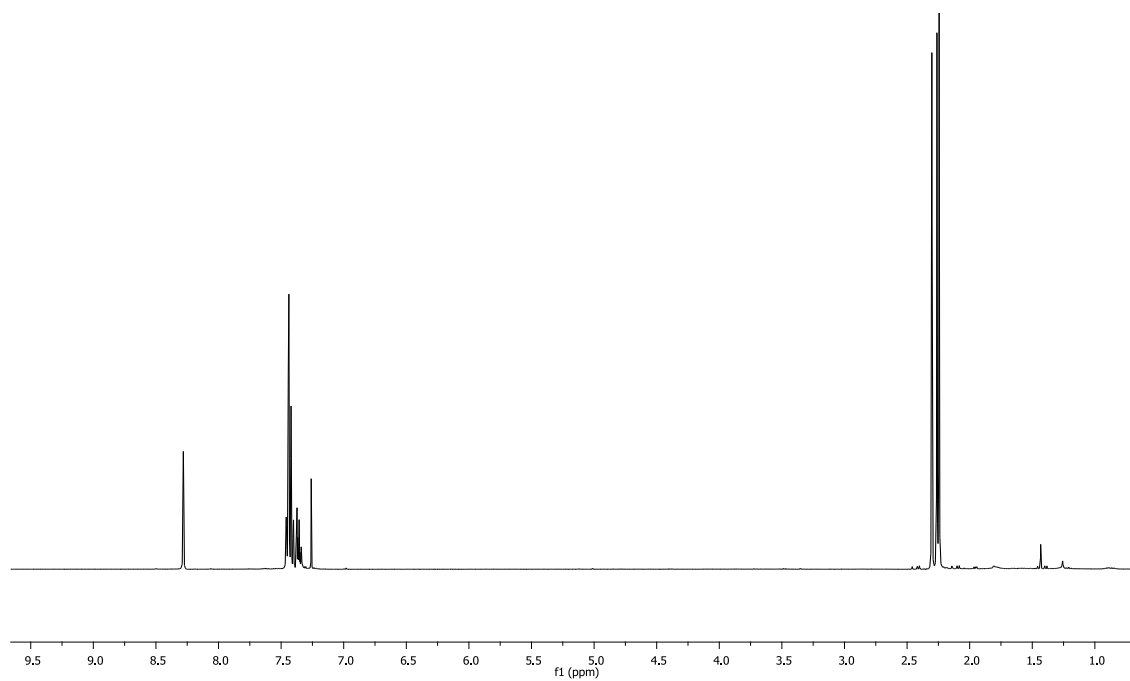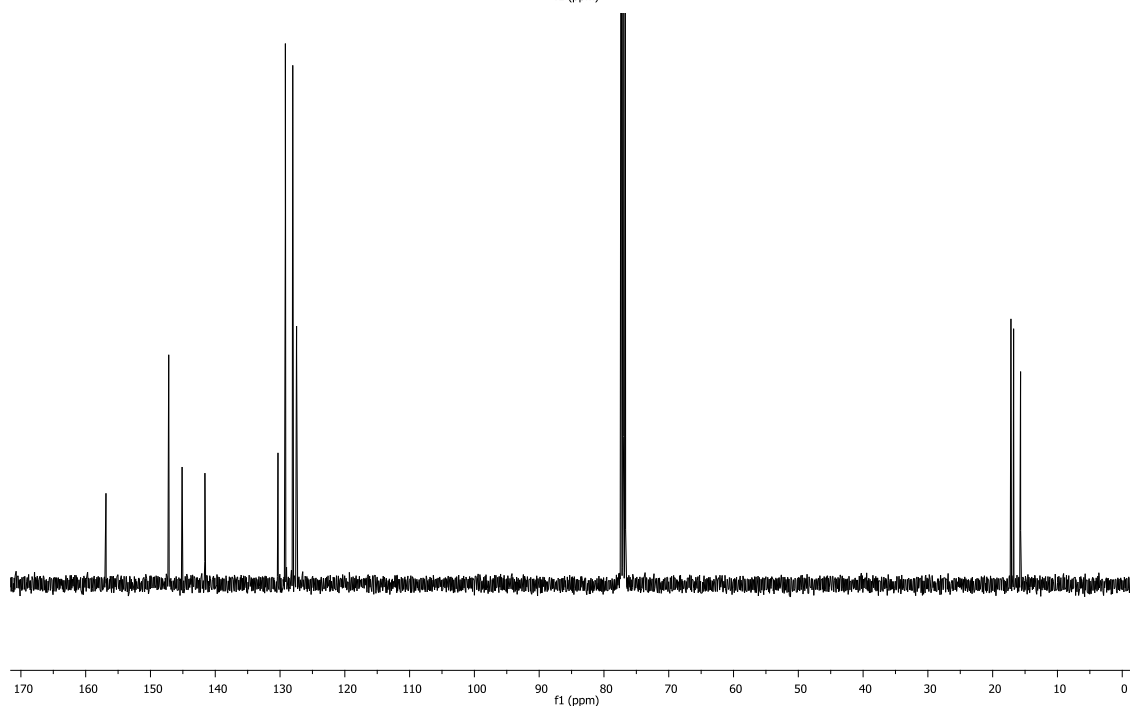

<sup>1</sup>H NMR (400 MHz) and <sup>13</sup>C NMR (100 MHz) of compound **36**

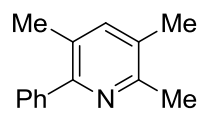

**37**

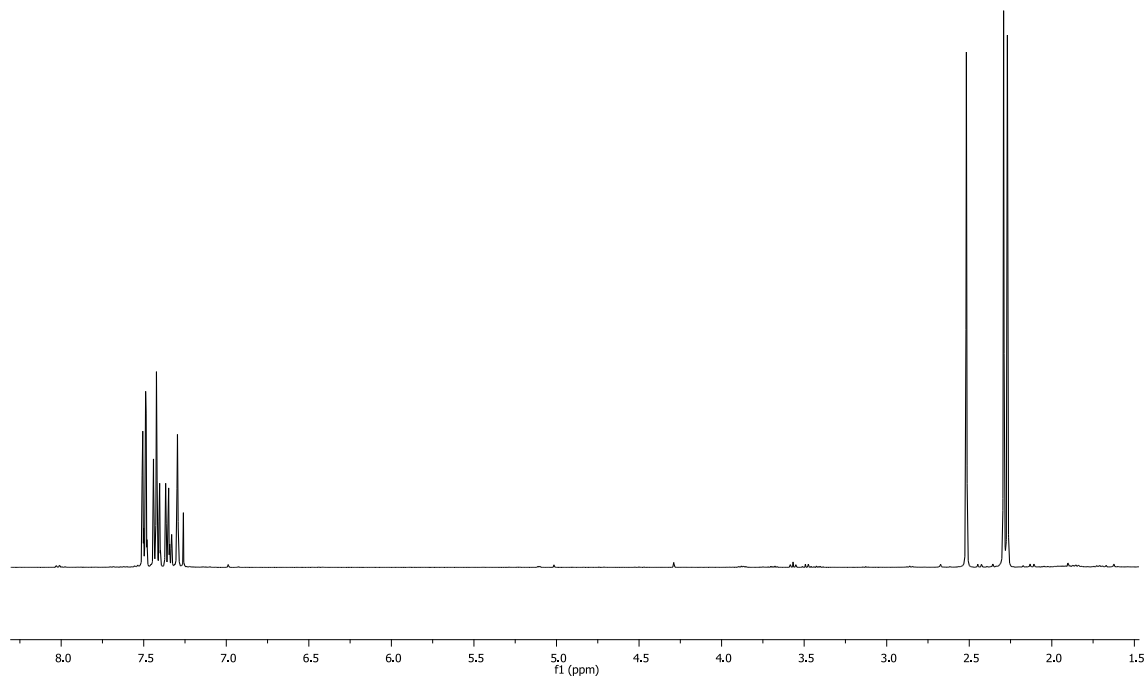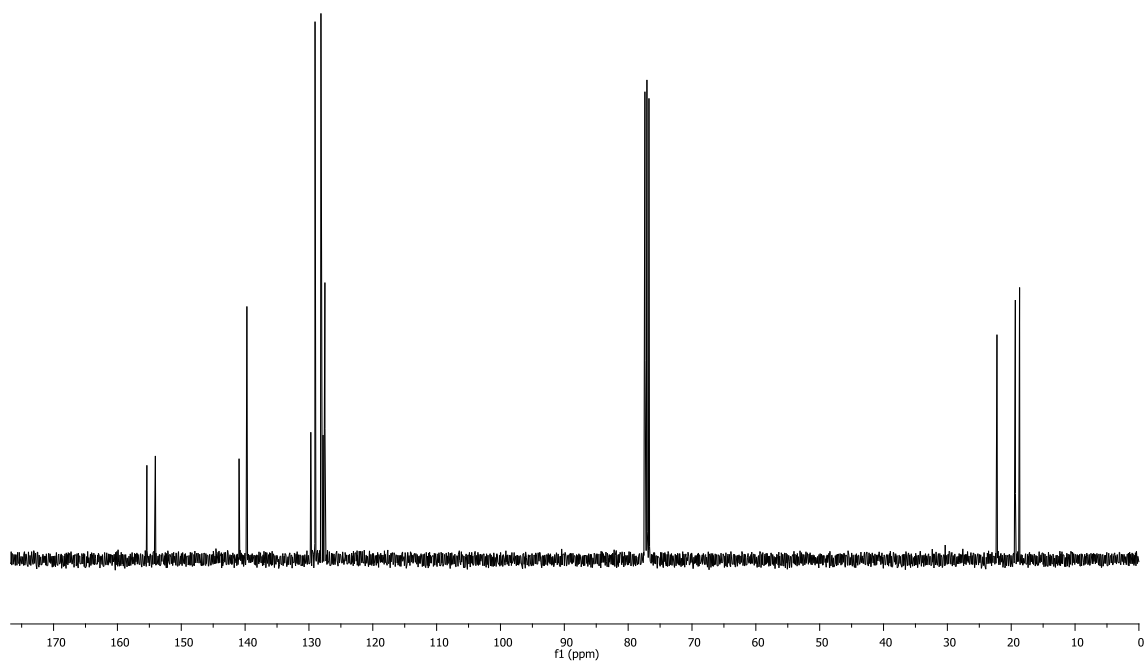

<sup>1</sup>H NMR (400 MHz) and <sup>13</sup>C NMR (100 MHz) of compound **37**

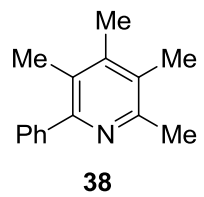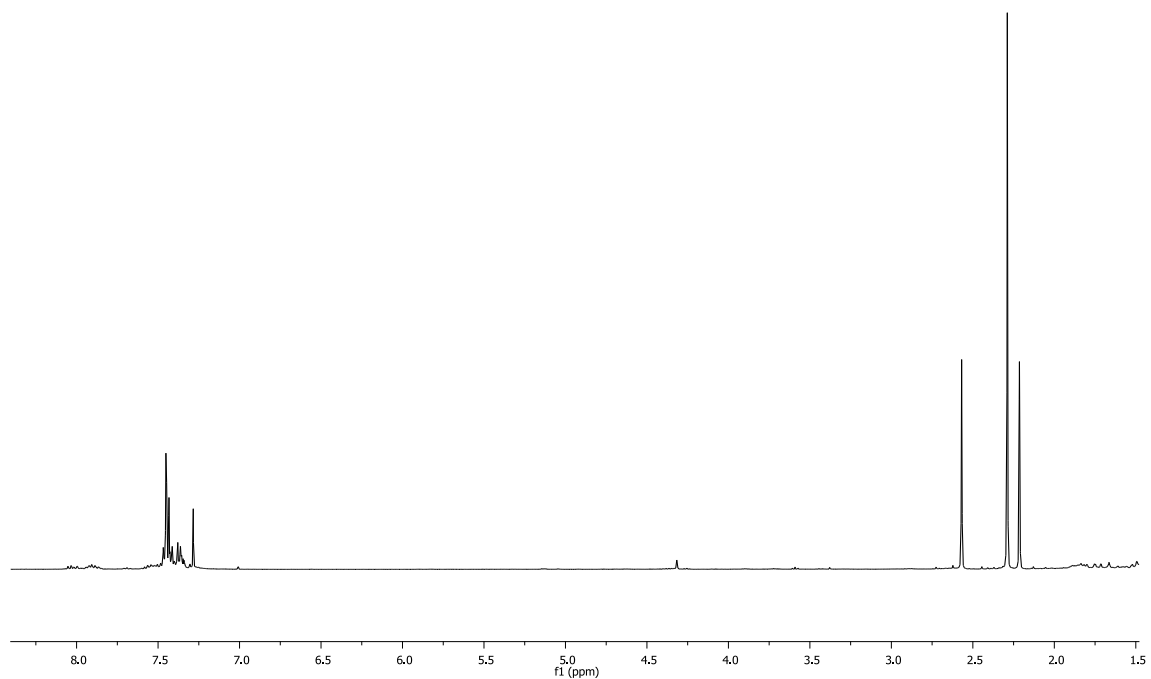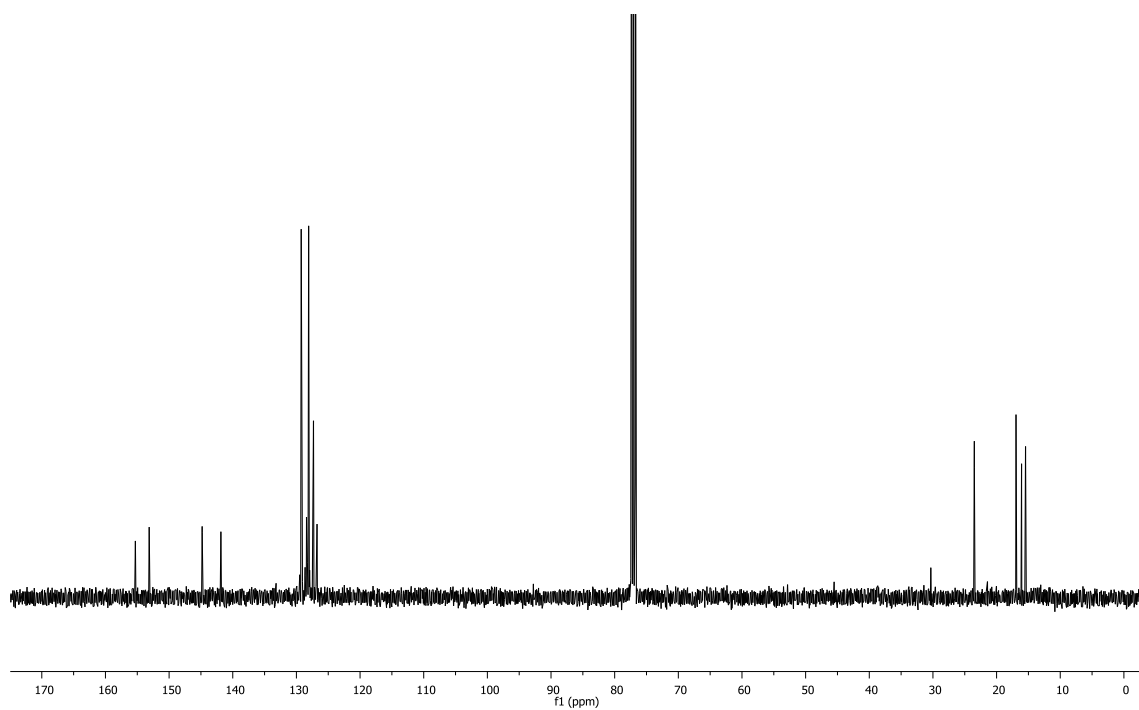

<sup>1</sup>H NMR (400 MHz) and <sup>13</sup>C NMR (100 MHz) of compound **38**

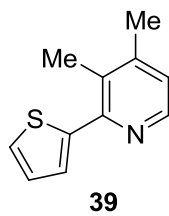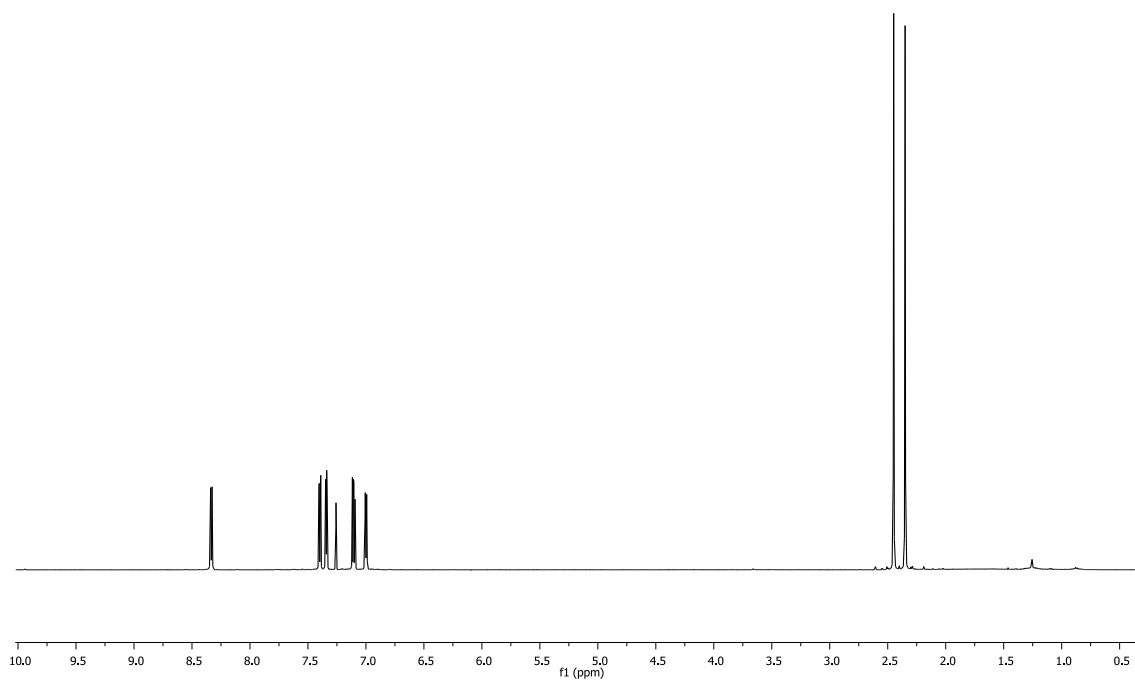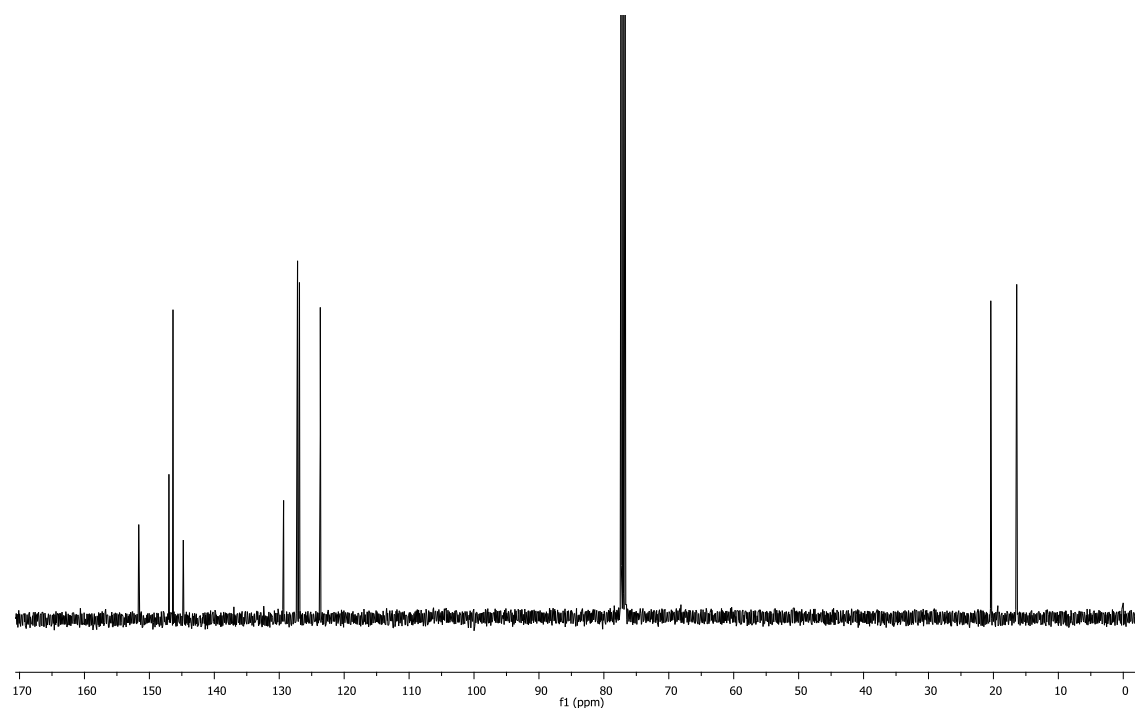

$^1\text{H}$  NMR (400 MHz) and  $^{13}\text{C}$  NMR (100 MHz) of compound **39**

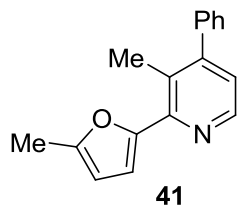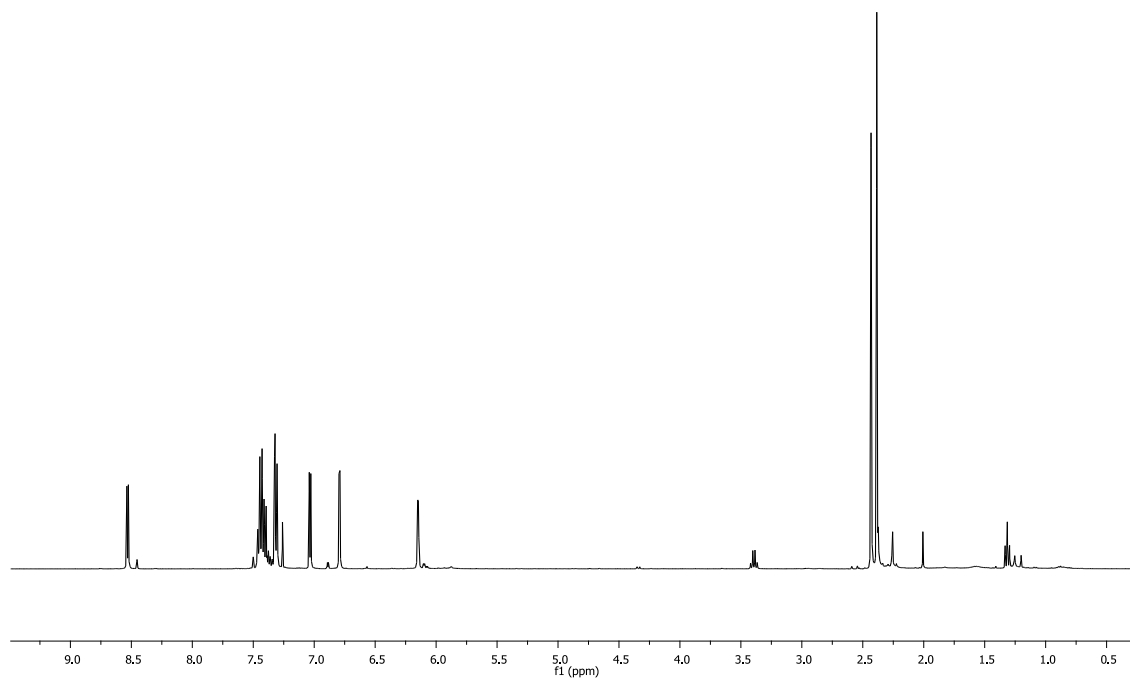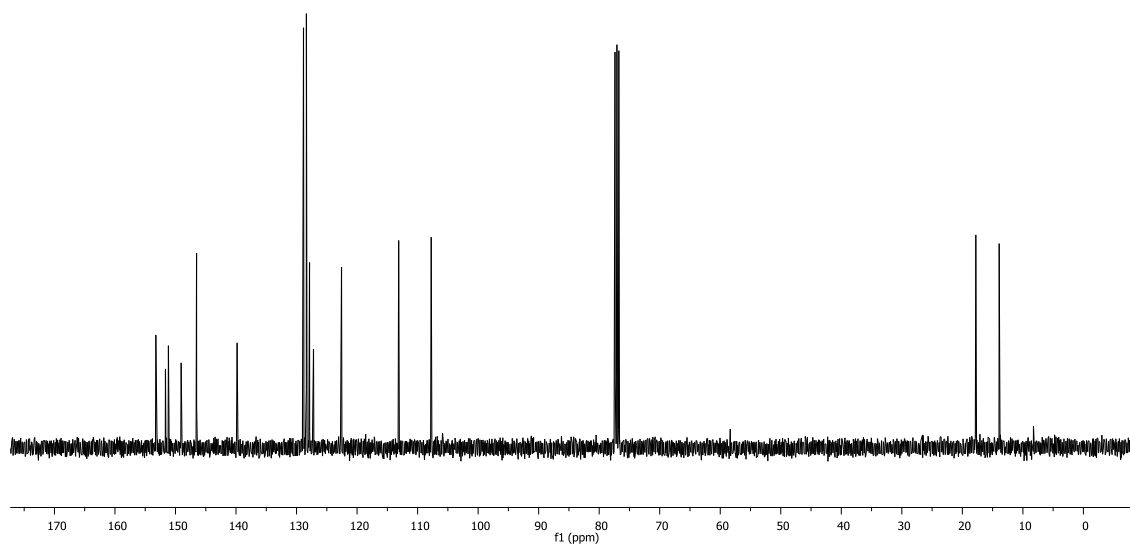

<sup>1</sup>H NMR (400 MHz) and <sup>13</sup>C NMR (100 MHz) of compound **41**

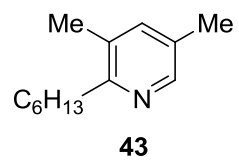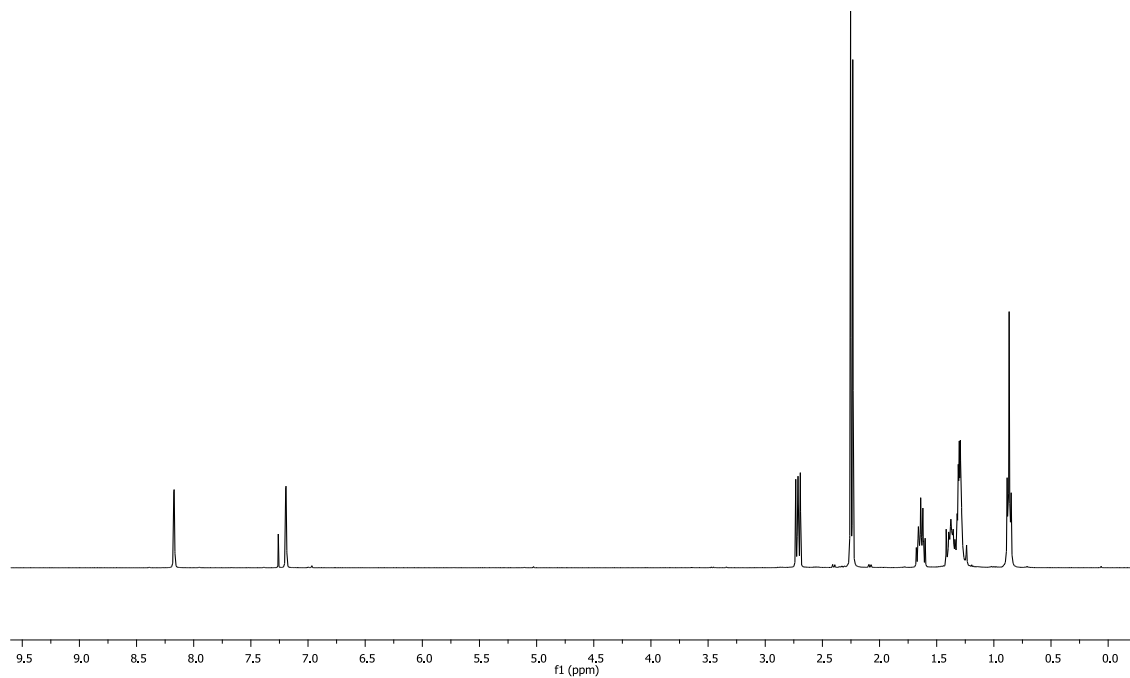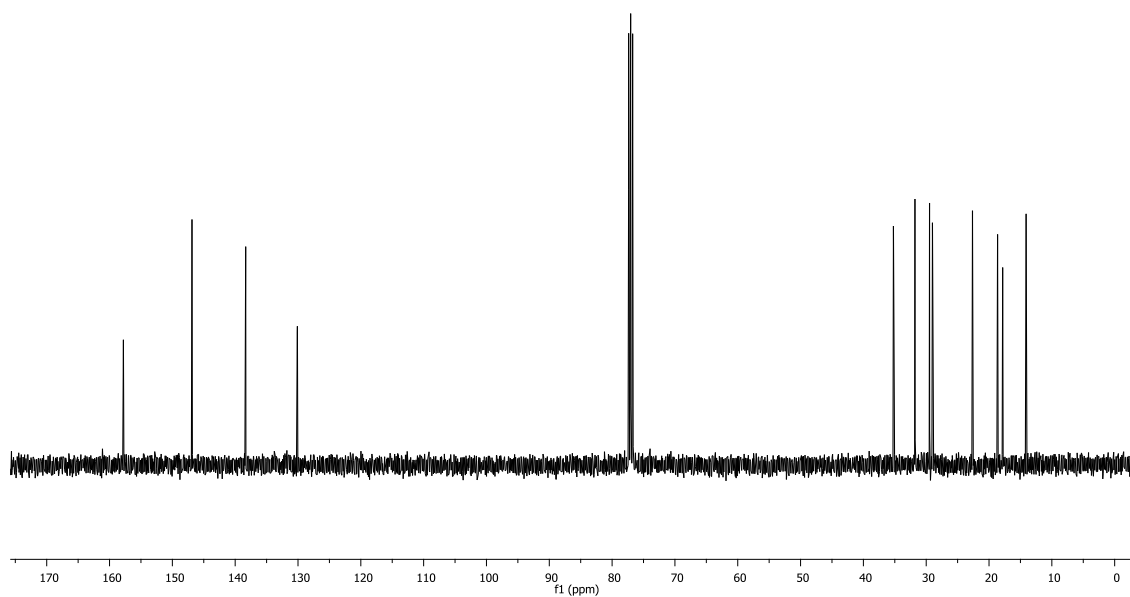

<sup>1</sup>H NMR (400 MHz) and <sup>13</sup>C NMR (100 MHz) of compound **43**



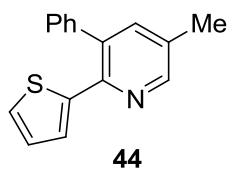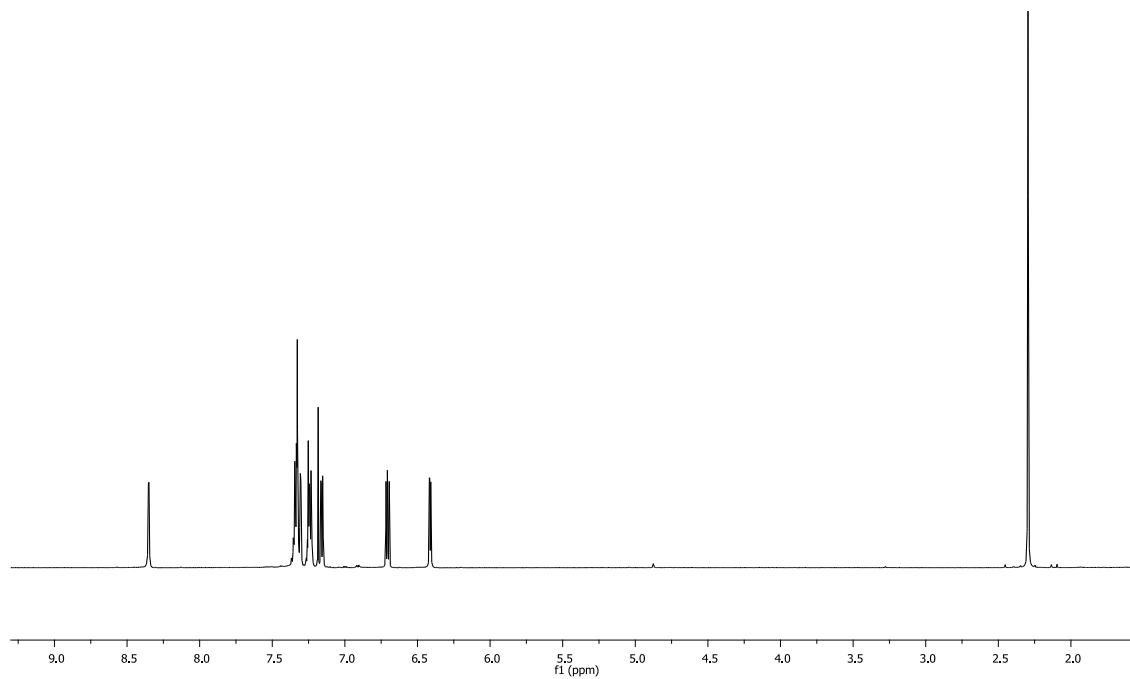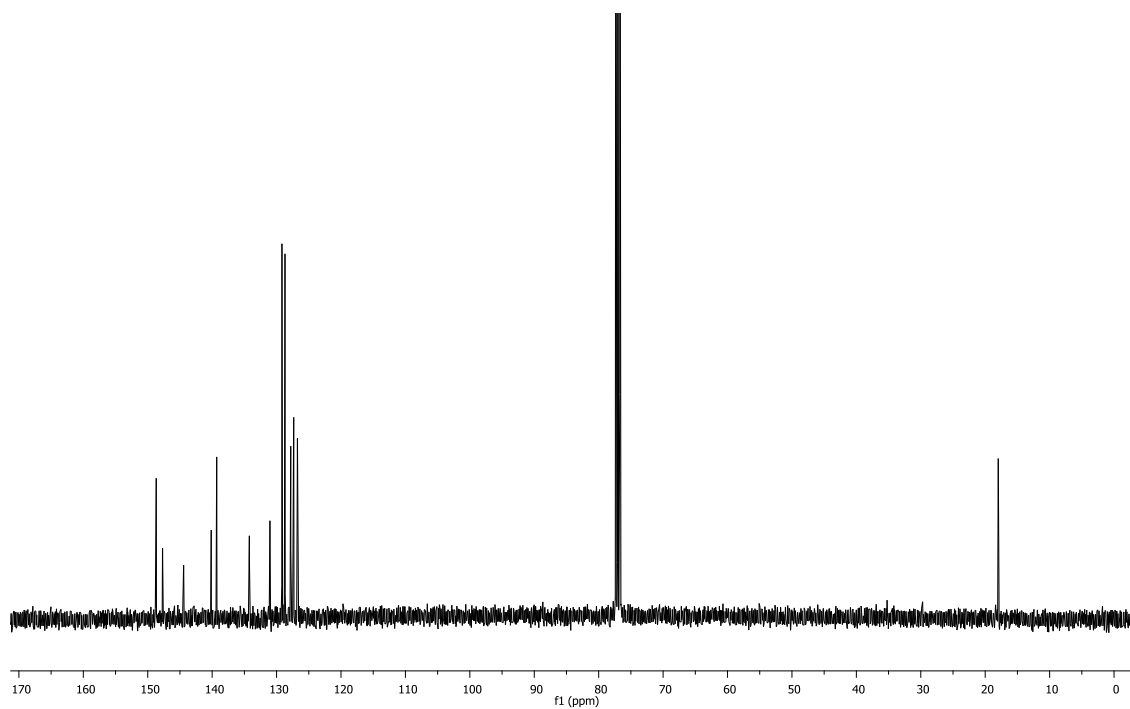

<sup>1</sup>H NMR (400 MHz) and <sup>13</sup>C NMR (100 MHz) of compound **44**

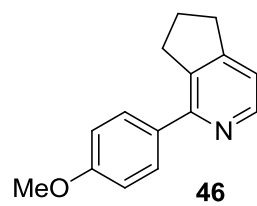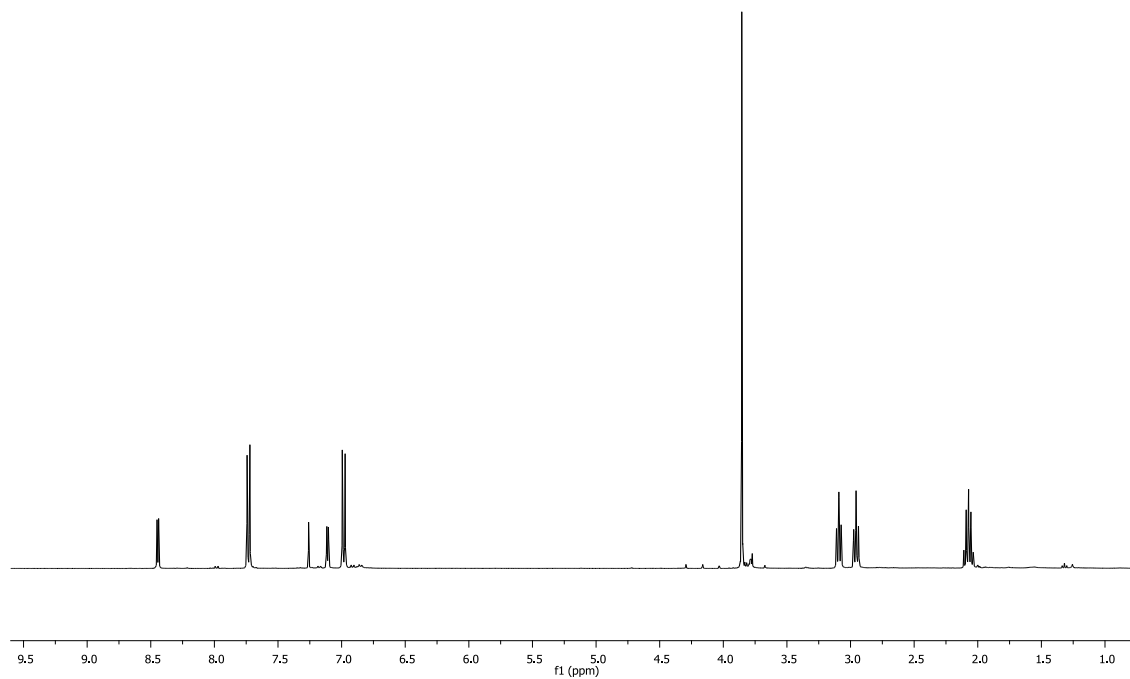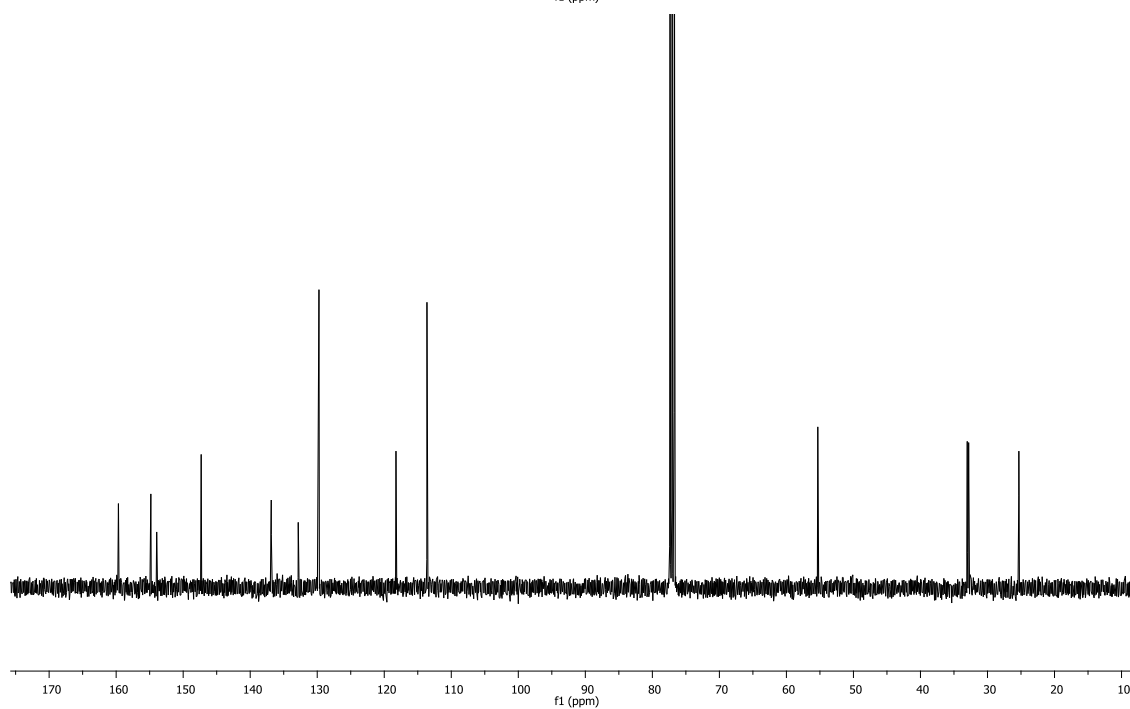

<sup>1</sup>H NMR (400 MHz) and <sup>13</sup>C NMR (100 MHz) of compound **46**

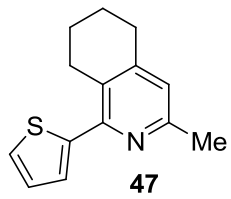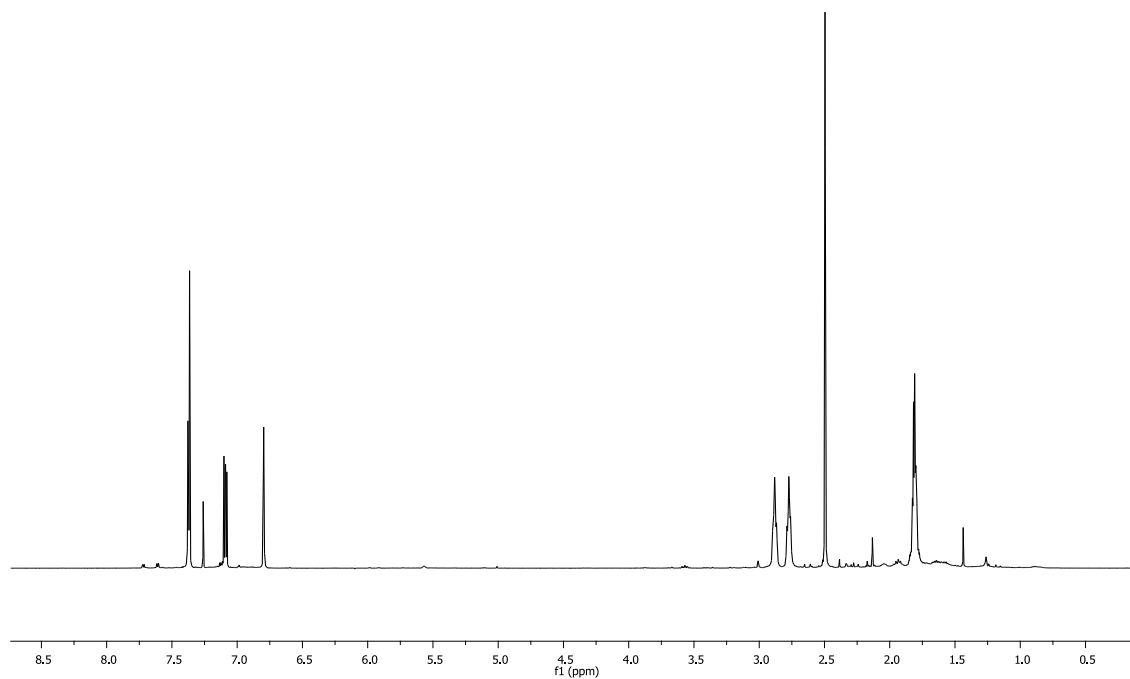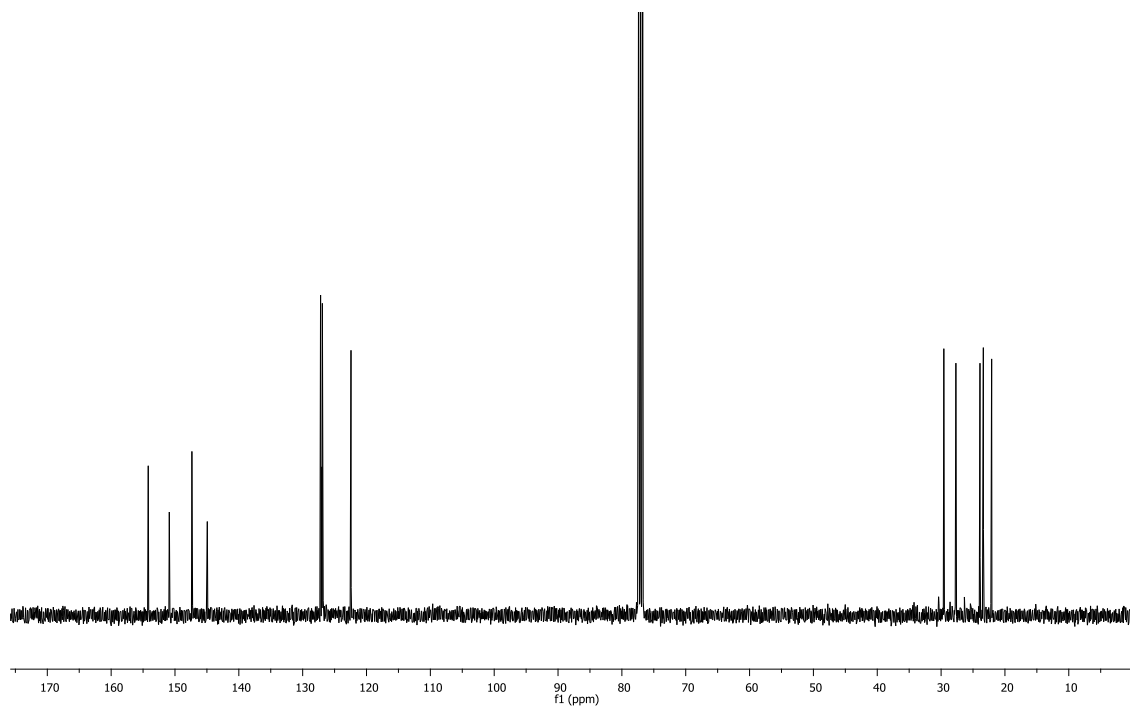

<sup>1</sup>H NMR (400 MHz) and <sup>13</sup>C NMR (100 MHz) of compound **47**

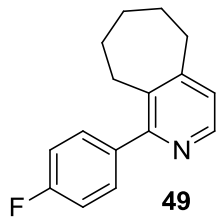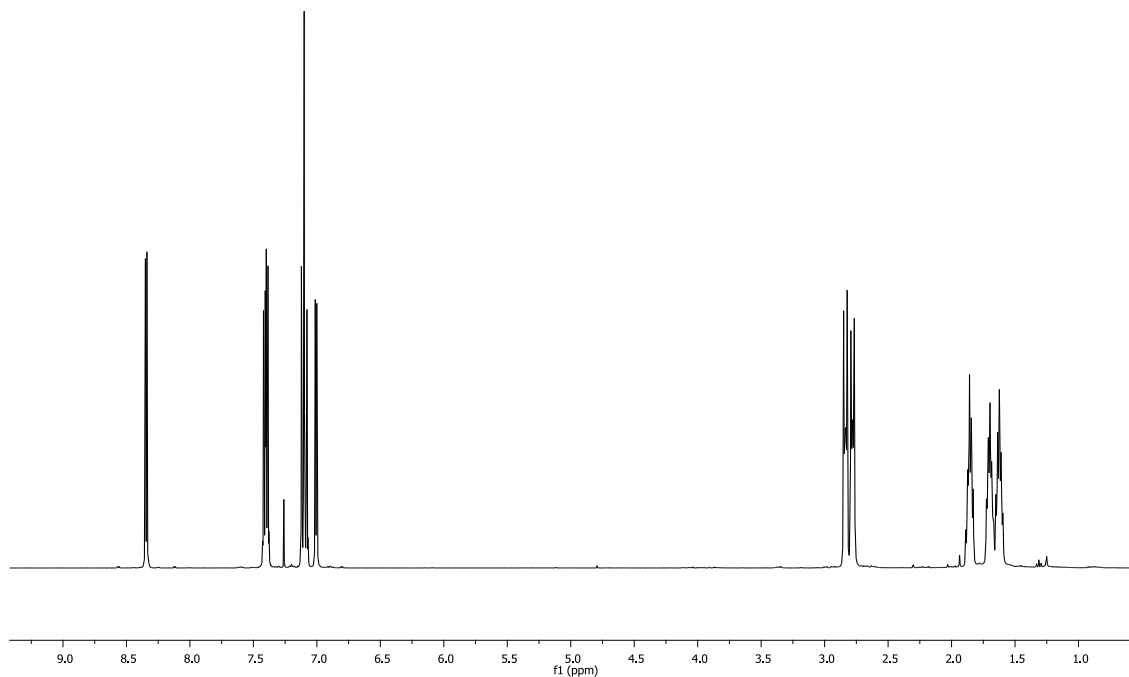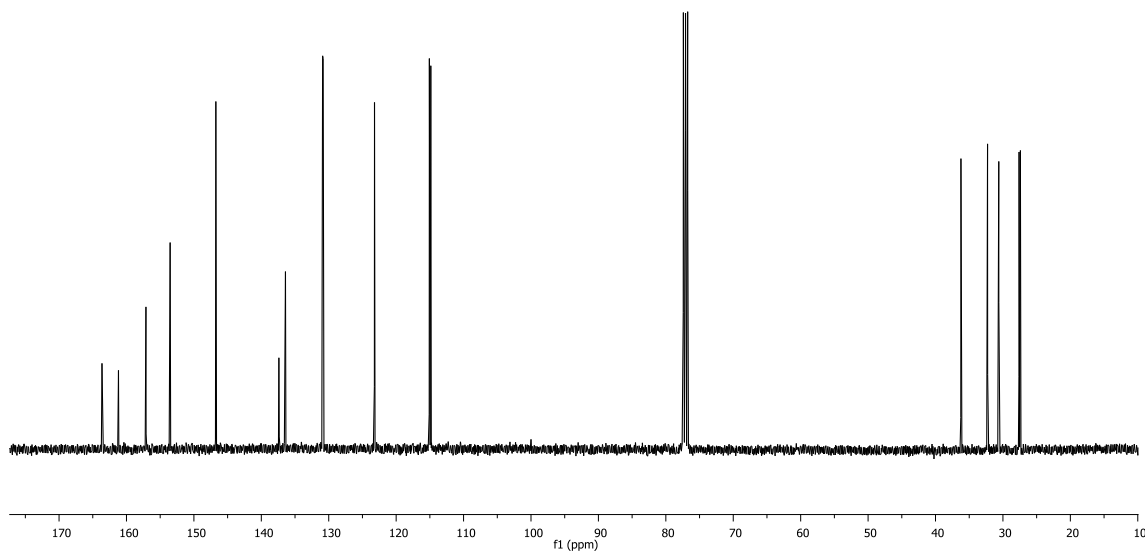

<sup>1</sup>H NMR (400 MHz) and <sup>13</sup>C NMR (100 MHz) of compound **49**

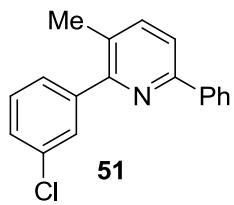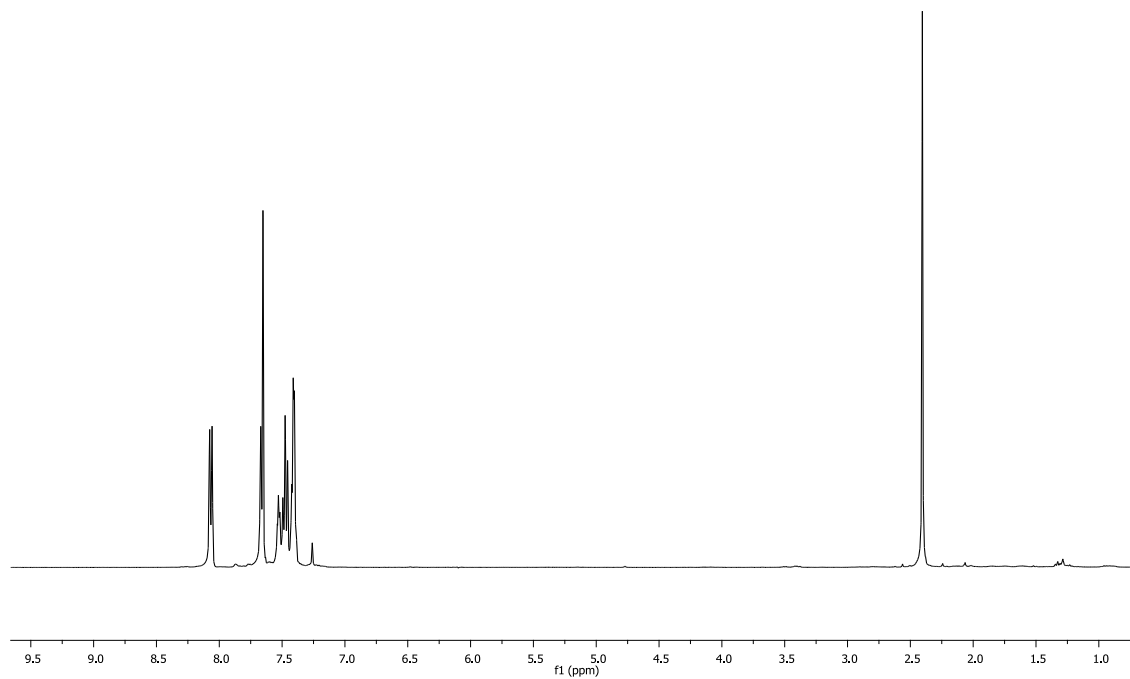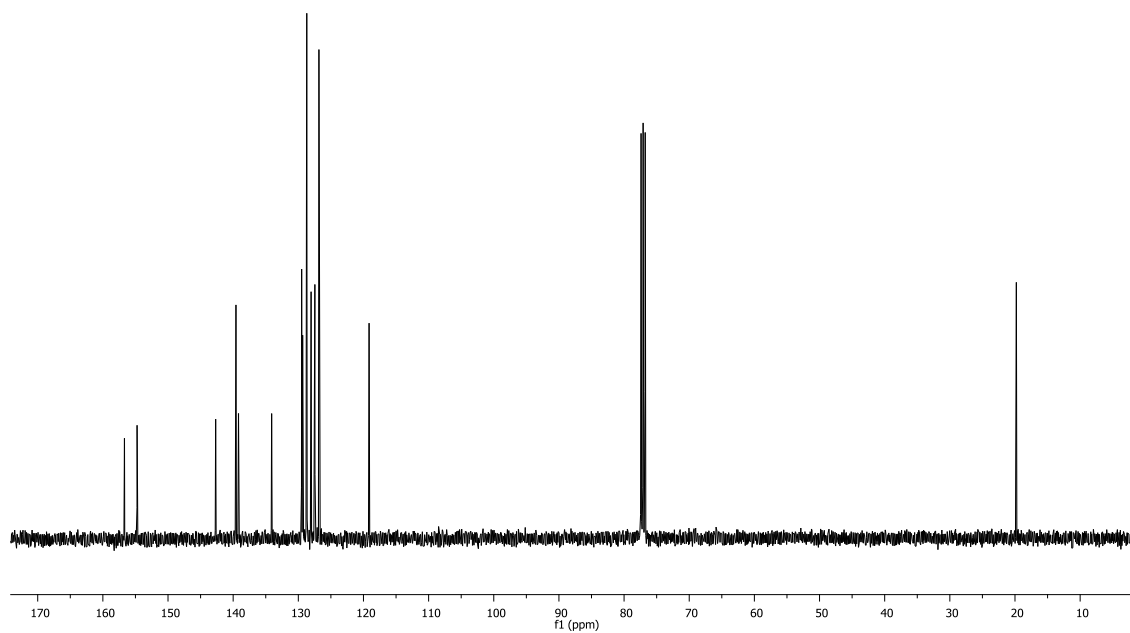

$^1\text{H}$  NMR (400 MHz) and  $^{13}\text{C}$  NMR (100 MHz) of compound **51**

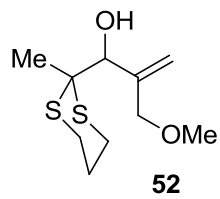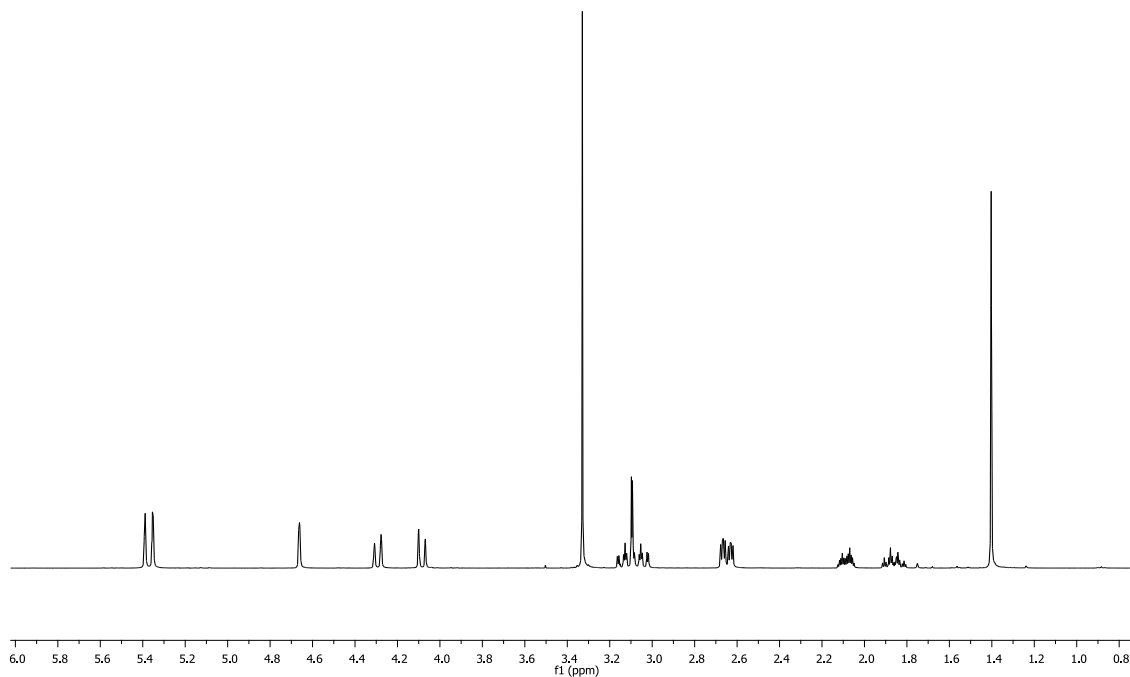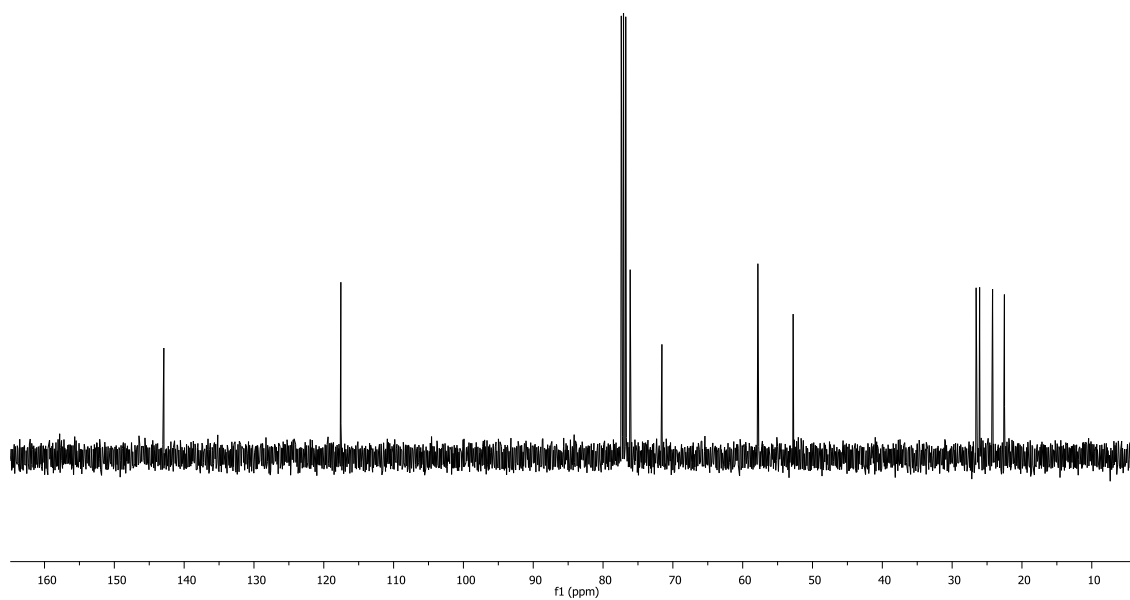

<sup>1</sup>H NMR (400 MHz) and <sup>13</sup>C NMR (100 MHz) of compound **52**

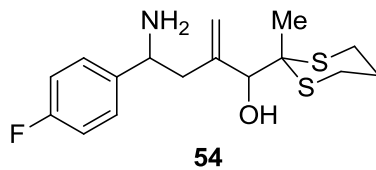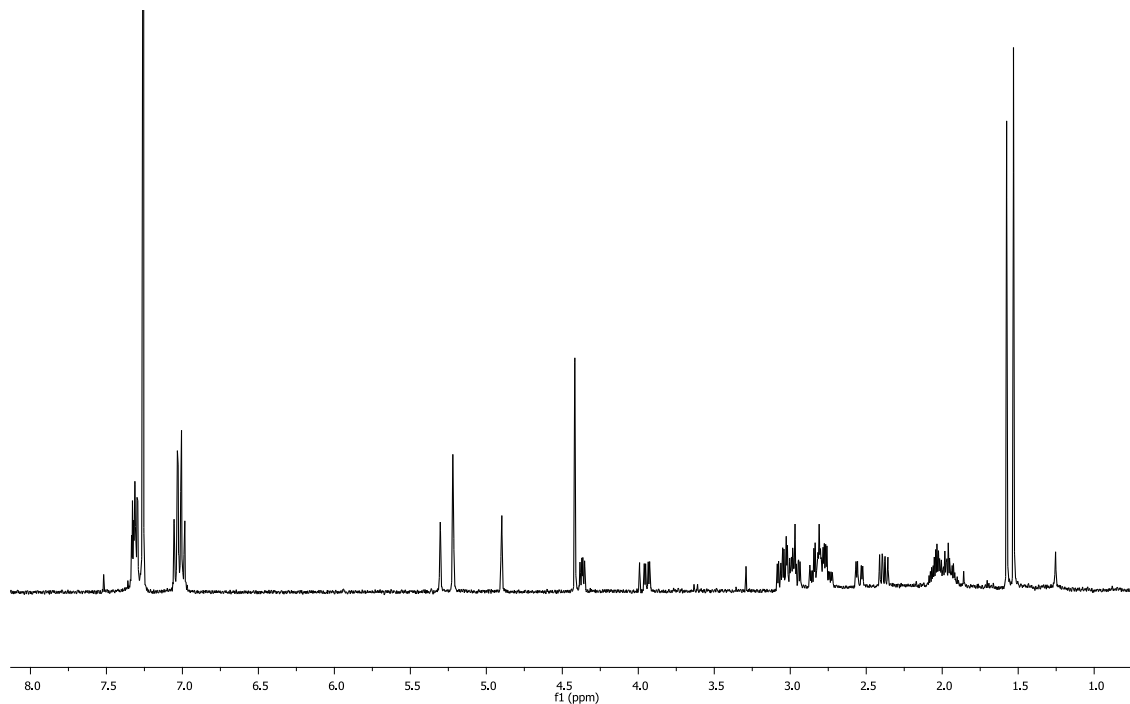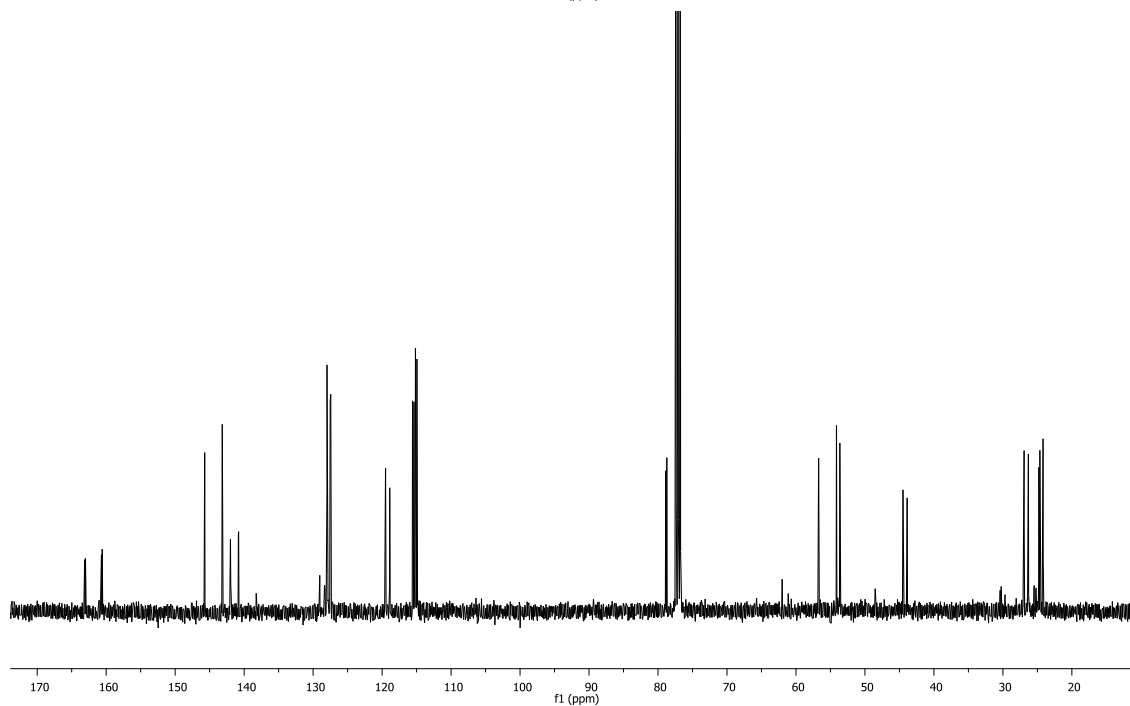

$^1\text{H}$  NMR (400 MHz) and  $^{13}\text{C}$  NMR (100 MHz) of compound **54** (inseparable mixture of two diastereomers)

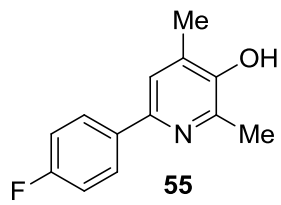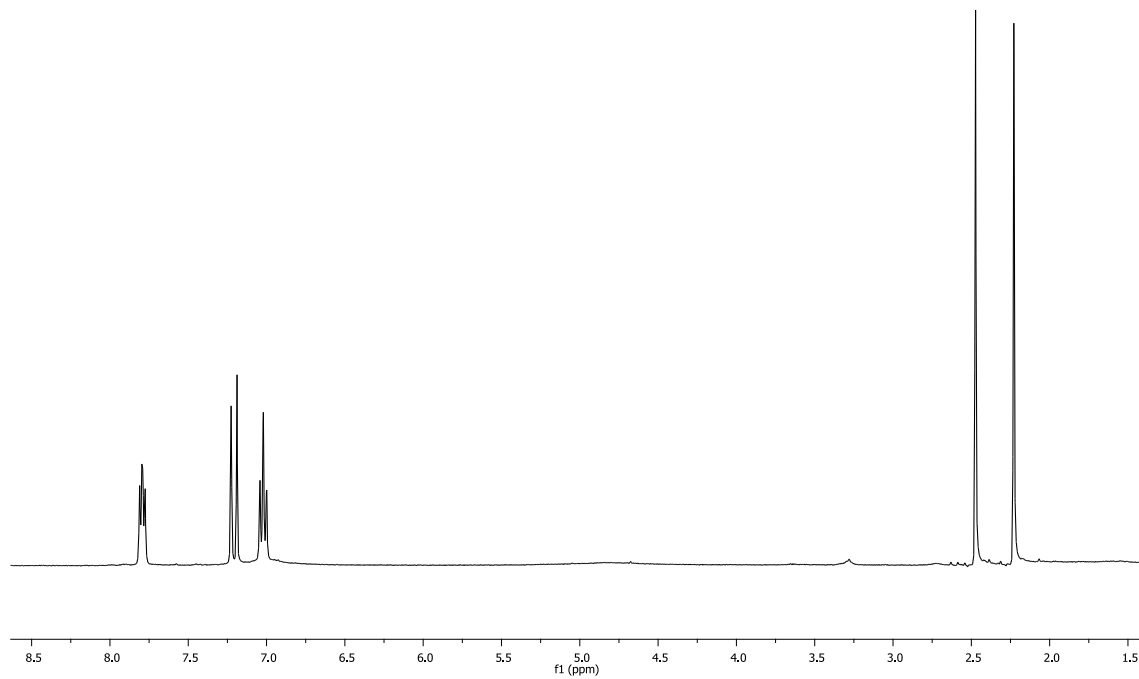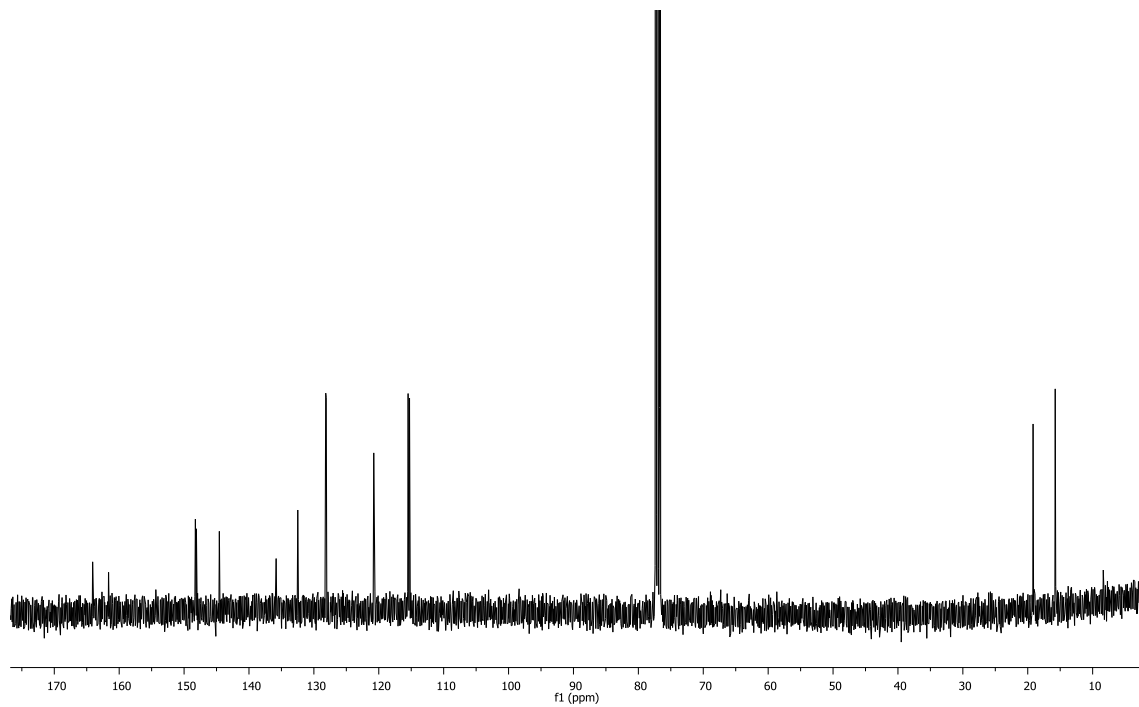

<sup>1</sup>H NMR (400 MHz) and <sup>13</sup>C NMR (100 MHz) of compound **55**
